# Supplementary material for: Reaction engineering enables selective chemoenzymatic transformation of alkynes into α-bromoketones and 1,2-dibromostyrenes
Source: Royal Society of Chemistry journal article supplement (doi:10.1039/d5gc05752c), 2026-01-01
Supplement: d5gc05752c1.pdf [file d5gc05752c1.pdf]

## Supplementary Information

### Reaction Engineering Enables Selective Chemoenzymatic Transformation of Alkynes into $\alpha$ -Bromoketones and 1,2- Dibromostyrenes

Jiangtao Sha <sup>a, b</sup>, Huanhuan Li <sup>b</sup>, Kun Guo <sup>\*a</sup>, Jie Zhang <sup>b</sup>, Jianqun Peng <sup>b</sup>, Junyi Cao <sup>b</sup>, Bishuang Chen <sup>\*c</sup>, and Wuyuan Zhang <sup>\*b</sup>

<sup>a</sup> School of Chemical Engineering and Technology, Xi'an Jiaotong University, Xi'an 710049, Shanxi, China.

<sup>b</sup> Key Laboratory of Engineering Biology for Low-carbon Manufacturing, Tianjin Institute of Industrial Biotechnology, Chinese Academy of Sciences, Tianjin 300308, China.

<sup>c</sup> School of Marine Sciences, Sun Yat-Sen University, Zhuhai 519082, Guangdong, China.

\*Corresponding author: kun.guo@xjtu.edu.cn; zhangwy@tib.cas.cn;  
chenbsh23@mail.sysu.edu.cn

## Table of Contents

|                                                                                                |           |
|------------------------------------------------------------------------------------------------|-----------|
| <b>Experimental Procedures .....</b>                                                           | <b>3</b>  |
| Expression information of <i>CiVCPO</i> .....                                                  | 3         |
| Preparation of cell free extract containing <i>CiVCPO</i> .....                                | 4         |
| Purification of <i>CiVCPO</i> by Ni-NTA .....                                                  | 4         |
| Procedure for the chemical synthesis of 1,2-dibromostyrene.....                                | 5         |
| Isolation and purification of the preparative-scale reaction products .....                    | 6         |
| <b>Analytical procedures .....</b>                                                             | <b>6</b>  |
| Gas chromatography (GC) .....                                                                  | 6         |
| GC-MS analysis .....                                                                           | 7         |
| NMR analysis .....                                                                             | 7         |
| Crystallography of <b>1-1</b> .....                                                            | 7         |
| <b>Further experimental results .....</b>                                                      | <b>8</b>  |
| SDS-PAGE analysis of purified <i>CiVCPO</i> .....                                              | 8         |
| Control experiments for the oxybromination of alkynes .....                                    | 8         |
| Time course of <b>1</b> (10-40 mM) catalysed by <i>CiVCPO</i> .....                            | 9         |
| Organic solvents optimization experiments.....                                                 | 9         |
| Non-model reaction of other substrates catalysed by <i>CiVCPO</i> .....                        | 10        |
| Isolated yield of products from preparative synthesis .....                                    | 11        |
| GC and GC-MS analysis of products from substrates <b>1-31</b> catalysed by <i>CiVCPO</i> ..... | 12        |
| Crystal structure of <b>1-1</b> .....                                                          | 47        |
| NMR analysis of products from preparative-scale synthesis .....                                | 48        |
| Mechanism investigation.....                                                                   | 59        |
| <b>E-factor analysis.....</b>                                                                  | <b>61</b> |
| <b>References .....</b>                                                                        | <b>62</b> |

## Experimental Procedures

Expression information of C/VCPO

Host: *Escherichia coli* BL21(DE3)

Plasmid: pET-28a (+)-C/VCPO

The DNA sequence of recombinant plasmid (the blue text denotes the plasmid sequence):

```
ATGGGCAGCAGCCATCATCATCATCACAGCAGCGGCCTGGTGCCGCGCGGCAGCCATATGGCTAG
CATGACTGGTGGACAGCAAATGGGTGCGGGATCCATGGGCAGCGTTACGCCGATTCCGCTGCCGAAA
ATTGATGAACCGGAAGAATATAATACCAACTATATTCTGTTTTGGAACCATGTTGGTCTGGAAGTGAATC
GTGTTACCCATACCGTGGGTGGTCCGCTGACGGGGCCCTCCTCTGAGCGCACGTGCACTGGGTATGCTG
CATCTGGCAATTCATGATGCATATTTAGCATTGTCTCCGACCGATTTTACCACCTTTCTGAGTCCGGA
TACCGAAAATGCGGCCTATCGTCTGCCGTACCGAATGGTGCCAATGATGCTCGTCAGGCCGTTGCAGG
CGCAGCCCTGAAAATGCTGAGCAGTCTGTATATGAAACCTGTTGAACAGCCGAATCCGAATCCGGGCG
CAAACATTAGCGATAATGCGTATGCACAGCTGGGTCTGGTCTGGATCGTAGTGTCTGGAAGCCCTG
GTGGTGTGCGATCGTGAATCTGCTAGCTTTATGTTTGGTGAAGATGTTGCAGATGTTTTTTTGCCTGCT
GAATGATCCTCGTGGCGCATCTCAGGAAGGTTATCATCCGACCCCTGGTCGTTATAAATTTGATGATGAA
CCGACCCATCCGGTTGTGCTGATTCTGTTGATCCTAATAATCCGAATGGTCCGAAAATGCCGTTTCGCC
AGTATCATGCGCCTTTTTATGGTAAAACCAACAAACGTTTTGCAACACAGAGCGAACATTTTCTGGCAG
ATCCTCCTGGTCTGCGTAGCAATGCAGATGAAACCGCCGAATATGATGATGCCGTCCGTGTTGCAATTG
CAATGGGCGGCGCCAGGCCCTGAATAGCACCAAACGTAGTCCTTGGCAGACCGCACAGGGTCTGTAT
TGGGCATACGATGGCAGCAATCTGATTGGTACACCGCCGCGTTTTTATAATCAGATTGTTGCTCGTATTG
CCGTTACCTATAAAAAGGAAGAAGATTAGCAAACAGCGAAGTTAATAATGCAGATTTTGCACGCCTGT
TTGCCCTGGTGCATGTTGCATGACTGATGCAGGCATTTTATAGCTGGAAAGAAAAATGGGAATTTGAAT
TTTGGCGTCCTCTGAGCGGTGTTCTGTGATGATGGTCGTCCGGATCATGGTGATCCTTTTTGGCTGACCC
TGGGCGCCCCGGCAACGAATACAAATGATATCCGTTTAAACCGCCGTTTCCGGCATATCCTAGCGGTC
ATGCAACCTTTGGTGGTGCAGTTTTTCAGATGGTTCGTGCTTATTATAATGGTCGTGTTGGTACGTGGAA
AGATGATGAACCTGATAATATTGCCATTGATATGATGATTAGCGAAGAACTGAATGGTGTTAATCGTGAT
CTGCGTCAGCCGTATGATCCTACGGCGCCGATTGAAGATCAGCCGGGTATTGTTTCGTACCCGTATTGTTT
GTCATTTTGATAGCGCCTGGGAAGTATGTTTGAATGCAATTAGTCGATTTTTCTGGGTGTTTCATTG
GCGTTTTGATGCAGCAGCAGCACGTGATATTCTGATTCTACCACCACTAAAGATGTTTATGCAGTTGAT
AATAACGGTGCAACCGTTTTTTCAGAATGTTGAAGATATTCGTTATACCACCCGTGGTACACGCGAAGAT
CCTGAAGGTCTGTTTCCGATCGGCGGCGTTCCGCTGGGTATTGAAATTGCAGATGAAATTTTAAACAAC
GGTCTGAAACCGACCCACCTGAAATTCAGCCTATGCCACAGGAAACCCCTGTTCAGAAACCGGTGGG
TCAGCAGCCGTTAAAGGTATGTGGGAAGAAGAACAGGCCCCGGTGGTGAAAGAAGCACCGCTCGA
GCACCACCACCACCACCTGAGATCCGGCT
```

The sequence of recombinant C/VCPO (the blue text denotes the sequence of tags):

HHHHHHSSGLVPRGSHMASMTGGQQMGRGSMGSVTPIPLPKIDEPEEYNTNYILFWNHVGLNLRVT  
 HTVGGPLTGPPLSARALGMLHLAIHDAYFSICPPTDFTTFLSPDTENAAYRLPSPNGANDARQAVAGAALK  
 MLSSLYMKPVEQPNPNPGANISDNAYAQLGLVLDRSVLEAPGGVDRESASFMFGEDVADVFFALLNDPR  
 GASQEGYHPTPGRYKFDDEPTHPVVLIPVDPNPNNGPKMPFRQYHAPFYGKTTKRFATQSEHFLADPPG  
 LRSNADETAEYDDAVRVAIAMGGAQALNSTKRSPWQTAQGLYWAYDGSNLIGTPPRFYNQIVRRIAVTYK  
 KEEDLANSEVNNADFARLFALVDVACTDAGIFSWKEKWEFEFWRPLSGVRDDGRPDHGDPPFWLTGAP  
 ATNTNDIPFKPPFPAYPSGHATFGGAVFQMVERRYYNGRVGTWKDDEPDNIAIDMMISEELNGVNRLDR  
 QPYDPTAPIEDQPGIVRTRIVRHFDASAWELMFENAIISRIFLGVHWRFDAAAARDILIPTTTTKDQVYAVDNNG  
 ATVFQNVEDIRYTTRGTREDPEGLFPIGGVPLGIEIADEIFNNGLKPTPPEIQMPQETPVQKPVGQQPVK  
 GMWEEEQAPVVKEAPLEHHHHHHH\*

#### Preparation of cell free extract containing C<sub>i</sub>VCPO

Preparation of C<sub>i</sub>VCPO was conducted as reported previously<sup>1</sup>. The recombinant plasmids were transformed into *Escherichia coli* BL21 (DE3) and pre-cultivated in 30 mL Luria-Bertani (LB) medium (5 g/L yeast extract, 10 g/L tryptone, and 10 g/L NaCl) containing 50 mg/L kanamycin at 37 °C and 220 rpm overnight. Then, 2 L LB medium containing 50 mg/L kanamycin was inoculated with 1 mL of an overnight culture. Cells were grown at 37 °C and 220 rpm. When the optical density at 600 nm (OD<sub>600</sub>) reached 0.6-1.0, IPTG was added for inducing protein expression at the final concentration of 0.5 mM, followed by incubation at 20 °C and 180 rpm for 20 h. The cells were harvested by centrifugation (8000 rpm, 5 min, 4 °C) and washed twice with 0.85% NaCl solution. The harvested cells were resuspended in Tris-H<sub>2</sub>SO<sub>4</sub> buffer (50 mM, pH 8.0) and disrupted by ultrasonication for 30 min (30% power, 3 s on and 5 s off at 4 °C). The cell lysate was centrifugated at 4 °C (10000 rpm) for 30 min, and the supernatant was filtered through a 0.45 µm filter. Then, the filtrate was packed in a dialysis bag with a molecular cutoff of 10 kDa, and the target enzyme solution was salt-exchanged with Tris-H<sub>2</sub>SO<sub>4</sub> buffer (50 mM, pH 8.0, 1 mM sodium orthovanadate). Enzyme activity was monitored by using phenol red method. Stop changing the salt until the enzyme activity stops changing, collect the enzyme solution, and concentrate it using a Millipore Amicon® Ultra centrifugal filters (10 kDa, 15 mL).

Phenol red analytical method: Incubating the enzyme in sodium citrate (100 mM, pH 5.0), 100 mM H<sub>2</sub>O<sub>2</sub>, 50 mM KBr, 100 µM phenol red at 25 °C.

#### Purification of C<sub>i</sub>VCPO by Ni-NTA

The harvested cells were resuspended with binding buffer (pH 8.0, 0.05 M Tris-H<sub>2</sub>SO<sub>4</sub> buffer, 0.3 M NaCl and 0.05 M imidazole) and disrupted by ultrasonication for 30 min (30% power, 3 s on and 5 s off at 4 °C). The cell lysate was centrifugated at 4 °C (10000 rpm) for 30 min, and

the supernatant was loaded onto a HisTrap™ FF crude column (GE, USA) equilibrated with binding buffer. Then, the samples were eluted with binding buffer at a flow rate of 5 mL/min to remove the impure proteins. Next, the elution of the target enzymes was conducted by gradually increasing the contents of an elution buffer (pH 8.0, 0.05 M Tris-H<sub>2</sub>SO<sub>4</sub> buffer, 0.5 M NaCl and 0.3 M imidazole) with a flow rate of 3 mL/min. Then, the filtrate was packed in a dialysis bag with a molecular cutoff of 10 kDa, and the target enzyme solution was salt-exchanged with Tris-H<sub>2</sub>SO<sub>4</sub> buffer (50 mM, pH 8.0, 1 mM sodium orthovanadate). The fractions containing target enzymes were concentrated by Millipore Amicon® Ultra centrifugal filters (10 kDa, 15 mL) with desalting buffer (pH 8.0, 0.05 M Tris-H<sub>2</sub>SO<sub>4</sub> buffer). The purified protein fractions were subjected to SDS-PAGE analysis to determine its purity. Additionally, the protein concentrations were measured by the Bradford protocol. Enzyme activity was monitored by using chlorodimedon (MCD) method as previously reported.

MCD analytical method: Incubating the enzyme in sodium citrate (100 mM, pH 5.0), 5 mM H<sub>2</sub>O<sub>2</sub>, 5 mM KBr, 100 μM MCD (methanol solution) at 25°C.

#### Procedure for the chemical synthesis of 1,2-dibromostyrene

The method for synthesizing 1,2-dibromostyrene was carried out according to the reported procedure with a slight modification<sup>2</sup>. Typically, the reaction was performed in a 1.5 mL glass vial, NBS (N-Bromosuccinimide, 0.1 mmol) was added into a mixture of the alkynes (0.05 mmol) and PPh<sub>3</sub> (Triphenylphosphine, 0.05 mmol) in CH<sub>2</sub>Cl<sub>2</sub> (200 μL), and the mixture was placed on a Thermo Shaker Incubator at 30 °C, 500 rpm for 3 h. After the reaction was complete, a 10 μL aliquot was taken, diluted 50-fold with ethyl acetate (EA), and subjected to GC and GC-MS analysis. The results were then compared with those obtained from the enzymatic catalytic reaction.

## Isolation and purification of the preparative-scale reaction products

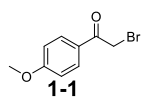

The crude product was purified by silica gel column chromatography with n-hexane: ethyl acetate = 50:1 as the eluent to give a light yellow solid (90 mg, 82% purity,  $R_f$  = 0.13).

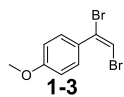

The crude product was purified by silica gel column chromatography with n-hexane as the eluent to give a colourless liquid (212 mg, 95% purity,  $R_f$  = 0.55).

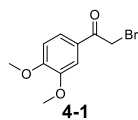

The crude product was purified by silica gel column chromatography with n-hexane: ethyl acetate = 20:1 as the eluent to give a light yellow solid (133.4 mg, 79% purity,  $R_f$  = 0.07).

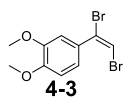

The crude product was purified by silica gel column chromatography with n-hexane: ethyl acetate = 20:1 as the eluent to give a white solid (275.2 mg, 97% purity,  $R_f$  = 0.39).

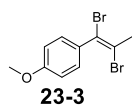

The crude product was purified by silica gel column chromatography with n-hexane as the eluent to give a colorless liquid (199.8 mg, 89% purity,  $R_f$  = 0.33).

## Analytical procedures

### Gas chromatography (GC)

GC2010 Pro or GC2030 from SHIMADZU equipped with SH-1 column (crossed 100% dimethyl polysiloxane, 30 m  $\times$  0.25 mm  $\times$  0.25  $\mu$ m) was employed in this research. Gas chromatography equipped with a flame ionization detector (FID) was used to quantify the conversion of each substrate and determine the selectivity of the products. Nitrogen was used as the carrier gas, and a column flow at 3 mL min<sup>-1</sup> and split ratio of 80:1 was used in all analyses. Data was analyzed using the software LabSolutions™ post-run analysis from SHIMADZU. Typically, for the determination of substrates **1-2**, **4-31**, and **S1-S3** catalysed by *Ci*VCPO, the GC was programmed from 120 °C (held for 0.5 min) to 180 °C at 10 °C min<sup>-1</sup> (held for 4 min), 30 °C min<sup>-1</sup> to 320 °C (held for 1 min). For the determination of **2** catalysed by *Ci*VCPO, the GC was programmed from 120 °C (held for 0.5 min) to 180 °C at 9 °C min<sup>-1</sup> (held for 6 min), 30 °C min<sup>-1</sup> to 320 °C (held for 1 min).

### GC-MS analysis

Electron ionisation (EI) GC-MS data were collected on GCMS-QP2010 equipped with SH-1 column (crossed 100% dimethyl polysiloxane, 30 m × 0.25 mm × 0.25 µm) was employed in this reasearch. The program for GC-MS analysis was identical to that employed in the GC protocol, as described above.

### NMR analysis

<sup>1</sup>H NMR (400 MHz) and <sup>13</sup>C NMR (101 MHz) spectra were recorded on a Quantum-I 400MHz spectrometer (Q.One Instruments Ltd., China) using CDCl<sub>3</sub> or DMSO-d<sub>6</sub> as solvents. Chemical shifts are reported in ppm relative to tetramethylsilane (TMS) as an internal standard. Signal multiplicities are abbreviated as: singlet (s), doublet (d), triplet (t), quartet (q), multiplet (m). Coupling constants (J) are given in Hz and were directly extracted from spectra without correction.

### Crystallography of **1-1**

Crystallization was achieved via the slow solvent evaporation method. Specifically, the product was dissolved in a mixture of ethyl acetate and petroleum ether (5:95, v/v) until just dissolved. The solution was placed in a glass vial and allowed to stand undisturbed at room temperature. Crystals formed after approximately 24 h through controlled solvent evaporation.

## Further experimental results

### SDS-PAGE analysis of purified *CiVCPO*

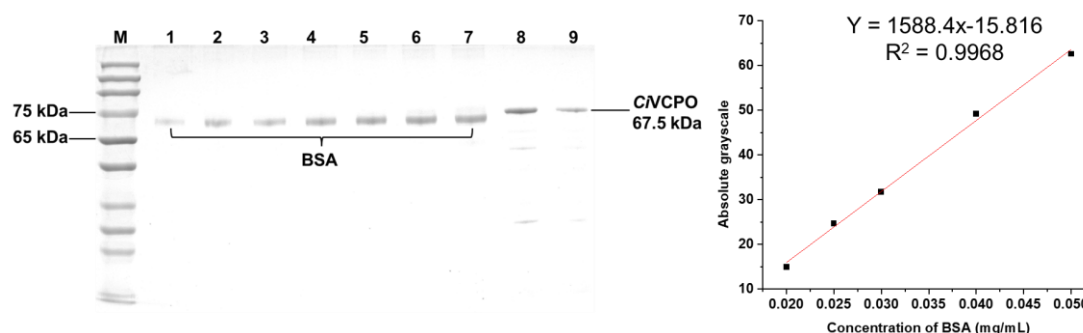

**Figure S1.** SDS-PAGE analysis and quantification of purified *CiVCPO*. Lane M, Marker. Lane 1-7 are different concentrations of bovine serum albumin (BSA). Lane 1, 0.01 mg/mL. Lane 2, 0.015 mg/mL. Lane 3, 0.02 mg/mL. Lane 4, 0.025 mg/mL. Lane 5, 0.03 mg/mL. Lane 6, 0.04 mg/mL. Lane 7, 0.05 mg/mL. Lane 8, *CiVCPO*. Lane 9, *CiVCPO*. The standard curve for gray scale analysis is  $Y = 1588.4x - 15.816$ ,  $R^2 = 0.9968$ .

### Control experiments for the oxybromination of alkynes

**Table S1.** Control experiments for the oxybromination of alkynes

| Entry | Conditions                                                                                           | Conversion (%) |      |
|-------|------------------------------------------------------------------------------------------------------|----------------|------|
| 1     | 10 mM <b>1</b> , 100 mM H <sub>2</sub> O <sub>2</sub> , 20 mM KBr with VO <sub>4</sub> <sup>3-</sup> | R.L.           | N.P. |
| 2     | 10 mM <b>1</b> , 100 mM H <sub>2</sub> O <sub>2</sub> , 20 mM KBr without <i>CiVCPO</i>              | R.L.           | N.P. |
| 3     | 10 mM <b>1</b> , 100 mM H <sub>2</sub> O <sub>2</sub> , 20 mM KBr with <i>CiVCPO</i>                 | 99             |      |
| 4     | 10 mM <b>1</b> , 100 mM H <sub>2</sub> O <sub>2</sub> , 1 M KBr without <i>CiVCPO</i>                | R.L.           | N.P. |
| 5     | 10 mM <b>1</b> , 100 mM H <sub>2</sub> O <sub>2</sub> , 1 M KBr with <i>CiVCPO</i>                   | >99            |      |

Reaction condition: 10% DMSO in citrate buffer (100 mM, pH 5.0), [**1**] = 10 mM, [*CiVCPO*] = 150 nM, [H<sub>2</sub>O<sub>2</sub>] = 100 mM, [KBr] = 20 or 1000 mM, 200  $\mu$ L scale, 30  $^{\circ}$ C, 800 rpm, 0.5 h. The conversion and product selectivity were determined by GC and GC-MS. R.L. = Relatively low. N.P. = No product.

Time course of **1** (10-40 mM) catalysed by *Ci*VCPO

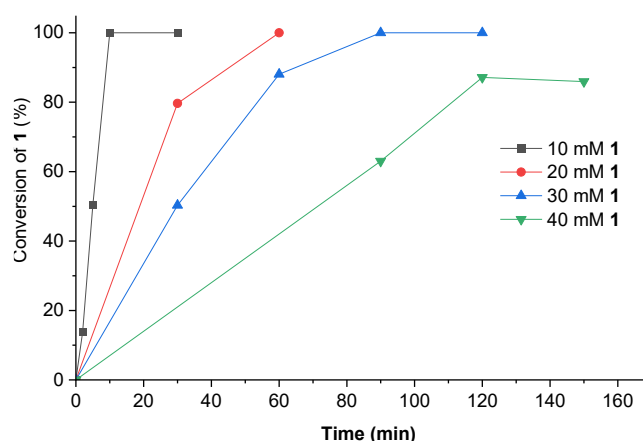

**Figure S2.** Time course of **1** (10-40 mM) catalysed by *Ci*VCPO. General reaction condition: 10% DMSO in citrate buffer (100 mM, pH 5.0), [**1**] = 10-40 mM, [*Ci*VCPO] = 150 nM, [KBr] = 20-80 mM, [H<sub>2</sub>O<sub>2</sub>] = 100-400 mM, 150 min, 200  $\mu$ L scale, 30  $^{\circ}$ C, 800 rpm, 150 min. The conversion was determined by GC.

**Table S2.** Product distribution with different concentration of **1**. Reaction condition: 10% DMSO in citrate buffer (100 mM, pH 5.0), [**1**] = 10-40 mM, [*Ci*VCPO] = 150 nM, [KBr] = 20-80 mM, [H<sub>2</sub>O<sub>2</sub>] = 100-400 mM, 200  $\mu$ L scale, 30  $^{\circ}$ C, 800 rpm, 150 min. The conversion and product selectivity were determined by GC and GC-MS.

| Entry | c ( <b>1</b> )<br>(mM) | c<br>( <i>Ci</i> VCPO)<br>(nM) | c<br>(H <sub>2</sub> O <sub>2</sub> )<br>(mM) | c<br>(KBr)<br>(mM) | reaction<br>time (min) | Conv.<br>(%) | Product selectivity (%) |     |     |     |
|-------|------------------------|--------------------------------|-----------------------------------------------|--------------------|------------------------|--------------|-------------------------|-----|-----|-----|
|       |                        |                                |                                               |                    |                        |              | 1-1                     | 1-2 | 1-3 | 1-4 |
| 1     | 10                     | 150                            | 100                                           | 20                 | 30                     | 99           | 60                      | 14  | 25  | 1   |
| 2     | 20                     |                                | 200                                           | 40                 | 60                     | 99           | 55                      | 3   | 41  | 2   |
| 3     | 30                     |                                | 300                                           | 60                 | 90                     | 99           | 53                      | 1   | 44  | 2   |
| 4     | 40                     |                                | 400                                           | 80                 | 120                    | 87           | 49                      | 1   | 48  | 23  |

## Organic solvents optimization experiments

**TableS3.** Organic solvents optimization experiments

| Entry | c ( <b>1</b> )<br>(mM) | 10%<br>organic<br>solvent | c<br>(KBr)<br>(mM) | c<br>(H <sub>2</sub> O <sub>2</sub> )<br>(mM) | c<br>( <i>Ci</i> VCPO)<br>(nM) | Conv.<br>(%) | Product selectivity (%) |     |     |     |
|-------|------------------------|---------------------------|--------------------|-----------------------------------------------|--------------------------------|--------------|-------------------------|-----|-----|-----|
|       |                        |                           |                    |                                               |                                |              | 1-1                     | 1-2 | 1-3 | 1-4 |
| 1     | 30                     | acetone                   | 60                 | 300                                           | 150                            | 99           | 35                      | 8   | 55  | 2   |
| 2     |                        | acetone                   | 1000               |                                               |                                | 67           | 4                       | 1   | 93  | 3   |
| 3     |                        | methanol                  | 60                 |                                               |                                | 94           | 45                      | 1   | 52  | 2   |
| 4     |                        | methanol                  | 1000               |                                               |                                | 73           | 4                       | 1   | 93  | 3   |

Reaction condition: 10% acetone or methanol in citrate buffer (100 mM, pH 5.0), [**1**] = 30 mM, [*Ci*VCPO] = 150 nM, [H<sub>2</sub>O<sub>2</sub>] = 300 mM, [KBr] = 60 or 1000 mM, 200  $\mu$ L scale, 30  $^{\circ}$ C, 800 rpm,

120 min. The conversion and product selectivity were determined by GC.

### Non-model reaction of other substrates catalysed by CVCPO

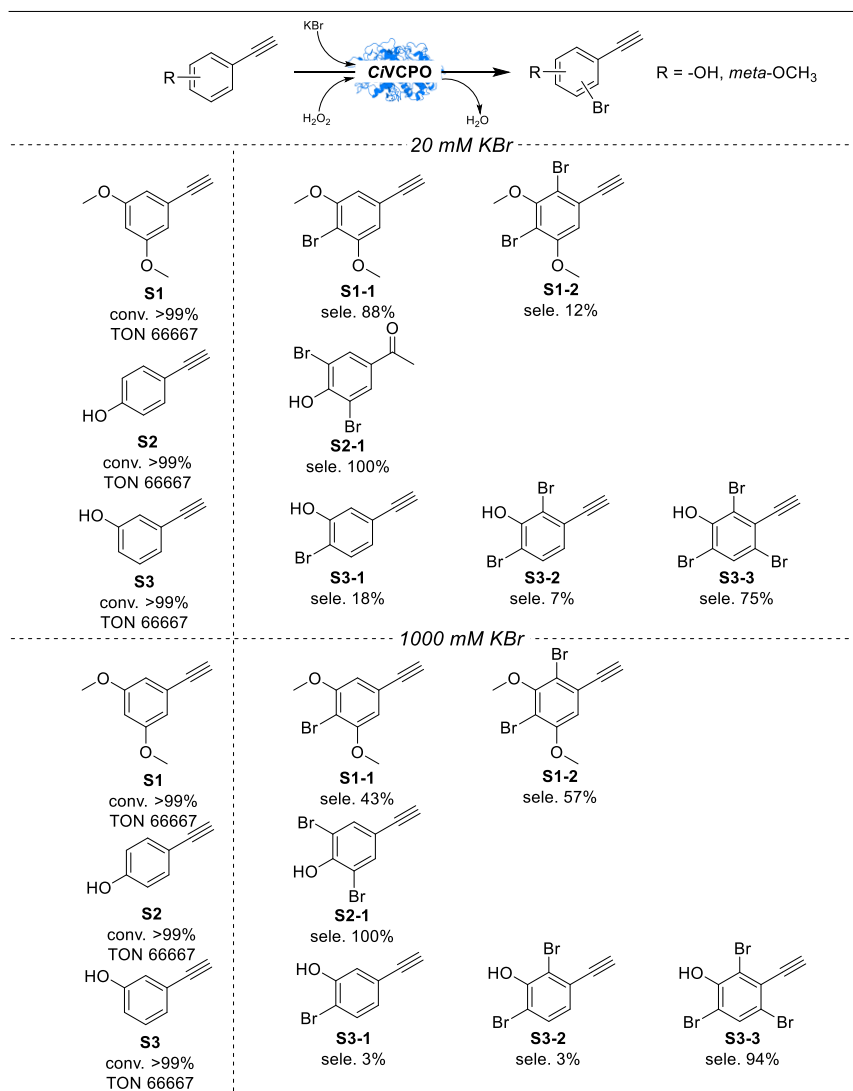

**Figure S3.** Non-model reaction of other substrates catalysed by CVCPO. General reaction condition: 10% DMSO in citrate buffer (100 mM, pH 5.0), [substrate] = 10 mM, [CVCPO] = 150 nM, [KBr] = 20 or 1000 mM, [H<sub>2</sub>O<sub>2</sub>] = 100 mM, 30 °C, 800 rpm, 0.5 h, 200 µL scale.

Isolated yield of products from preparative synthesis

**Table S4.** Isolated yield of products from preparative synthesis

| Substrate                                                                                      | Condition | Product isolated yield (%)                                                                              |
|------------------------------------------------------------------------------------------------|-----------|---------------------------------------------------------------------------------------------------------|
| 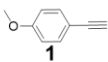<br><b>1</b>  | A         | <br><b>1-1</b><br>51%  |
| <br><b>4</b>  | B         | <br><b>4-1</b><br>65%  |
| <br><b>1</b>  | C         | <br><b>1-3</b><br>79%  |
| <br><b>4</b>  | D         | <br><b>4-3</b><br>97%  |
| <br><b>23</b> | E         | <br><b>23-3</b><br>70% |

Reaction condition: [substrate] = 30 mM (1 mmol), 10% DMSO, citrate buffer (100 mM, pH 5.0), 30 °C, 500 rpm. A. [CVCPO] = 150 nM, [H<sub>2</sub>O<sub>2</sub>] = 150 mM, [KBr] = 13.33 mM/h, 4 h; B. [CVCPO] = 150 nM, [H<sub>2</sub>O<sub>2</sub>] = 200 mM, [KBr] = 13.33 mM/h, 4 h; C. [CVCPO] = 150 nM, [H<sub>2</sub>O<sub>2</sub>] = 150 mM, [KBr] = 1 M, 3 h; D. [CVCPO] = 150 nM, [H<sub>2</sub>O<sub>2</sub>] = 200 mM, [KBr] = 2 M, 3 h; E. [CVCPO] = 150 nM, [H<sub>2</sub>O<sub>2</sub>] = 250 mM, [KBr] = 2 M, 3 h.

GC and GC-MS analysis of products from substrates **1-31** catalysed by *Ci*VCPO

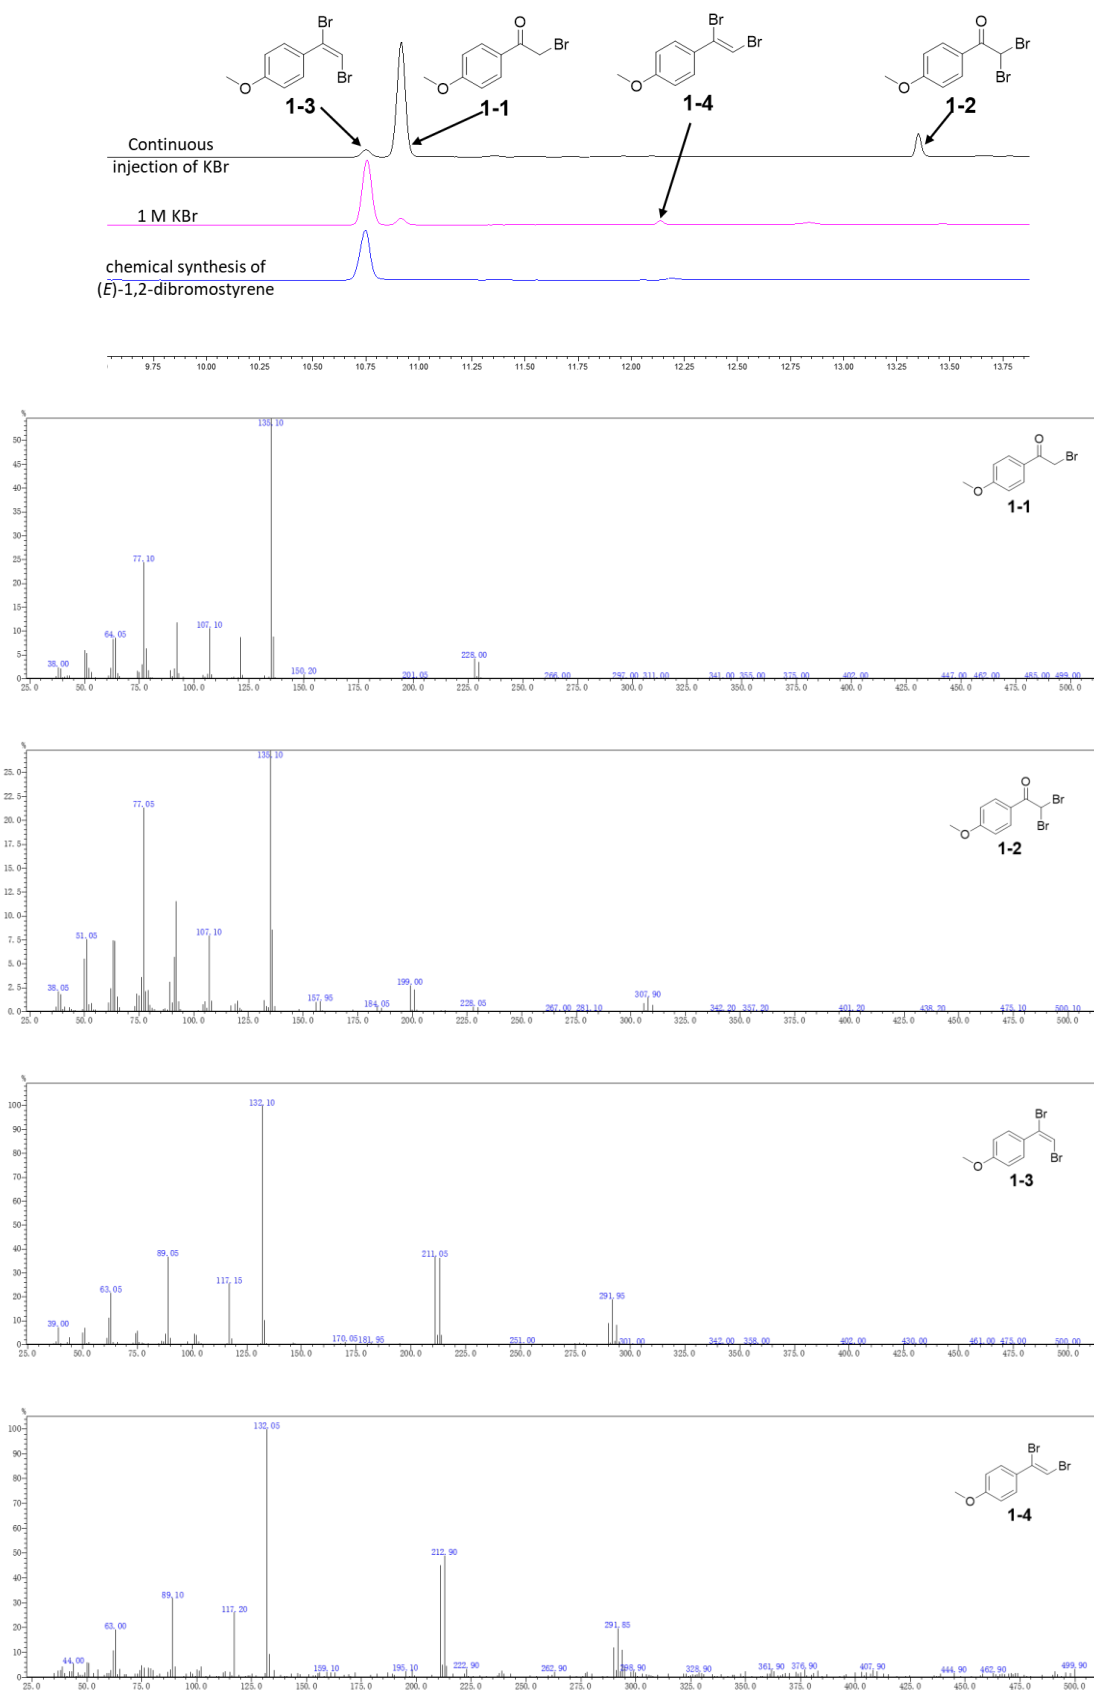

**Figure S4.** Representative GC and Mass spectrum of **1-1**, **1-2**, **1-3**, **1-4**

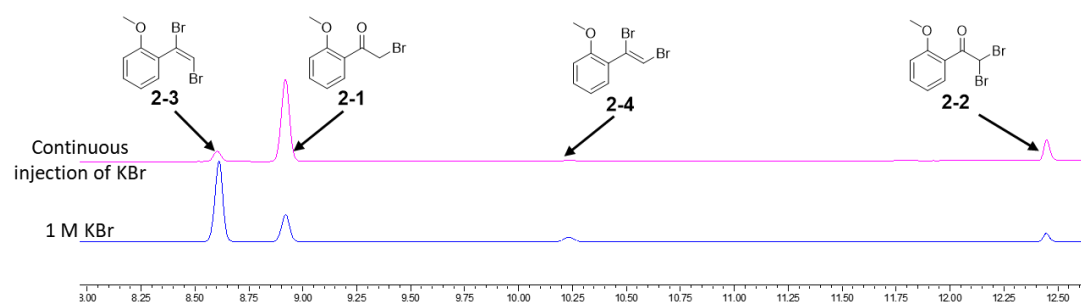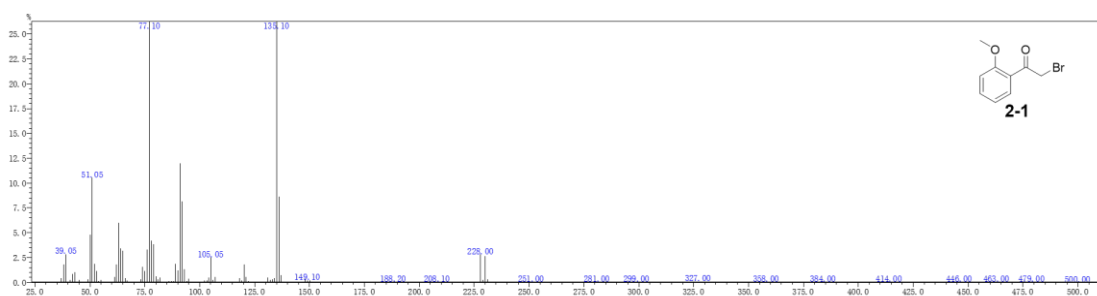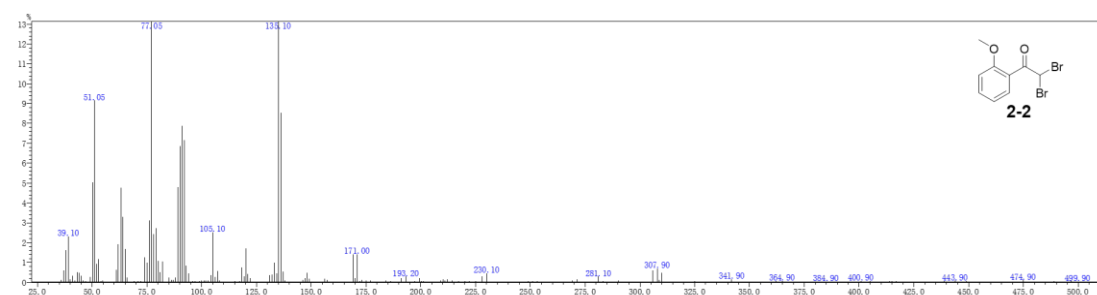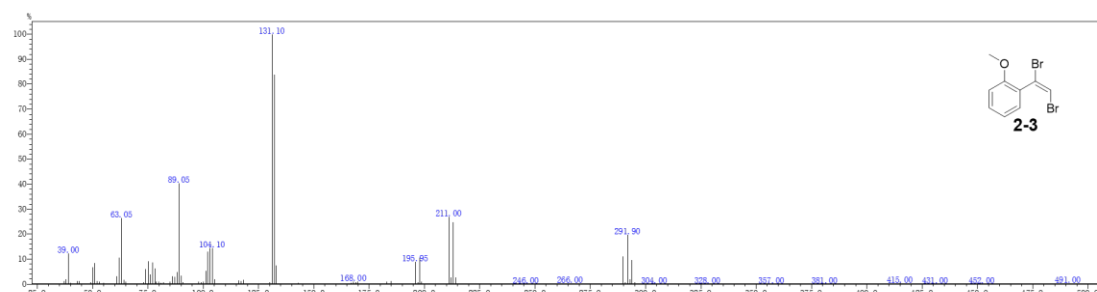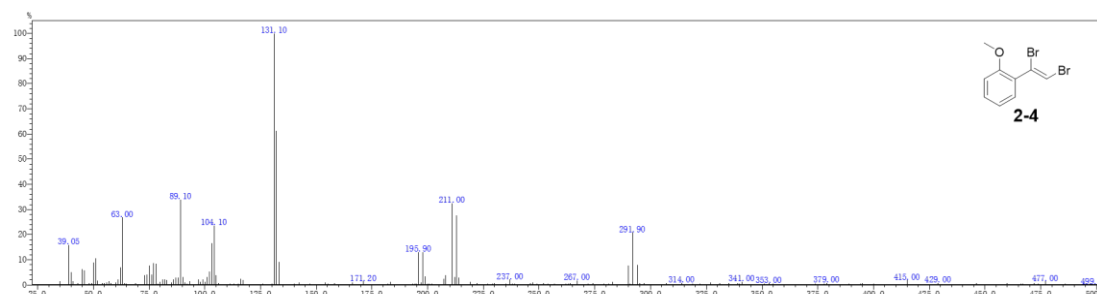

**Figure S5.** Representative GC and Mass spectrum of 2-1, 2-2, 2-3, 2-4

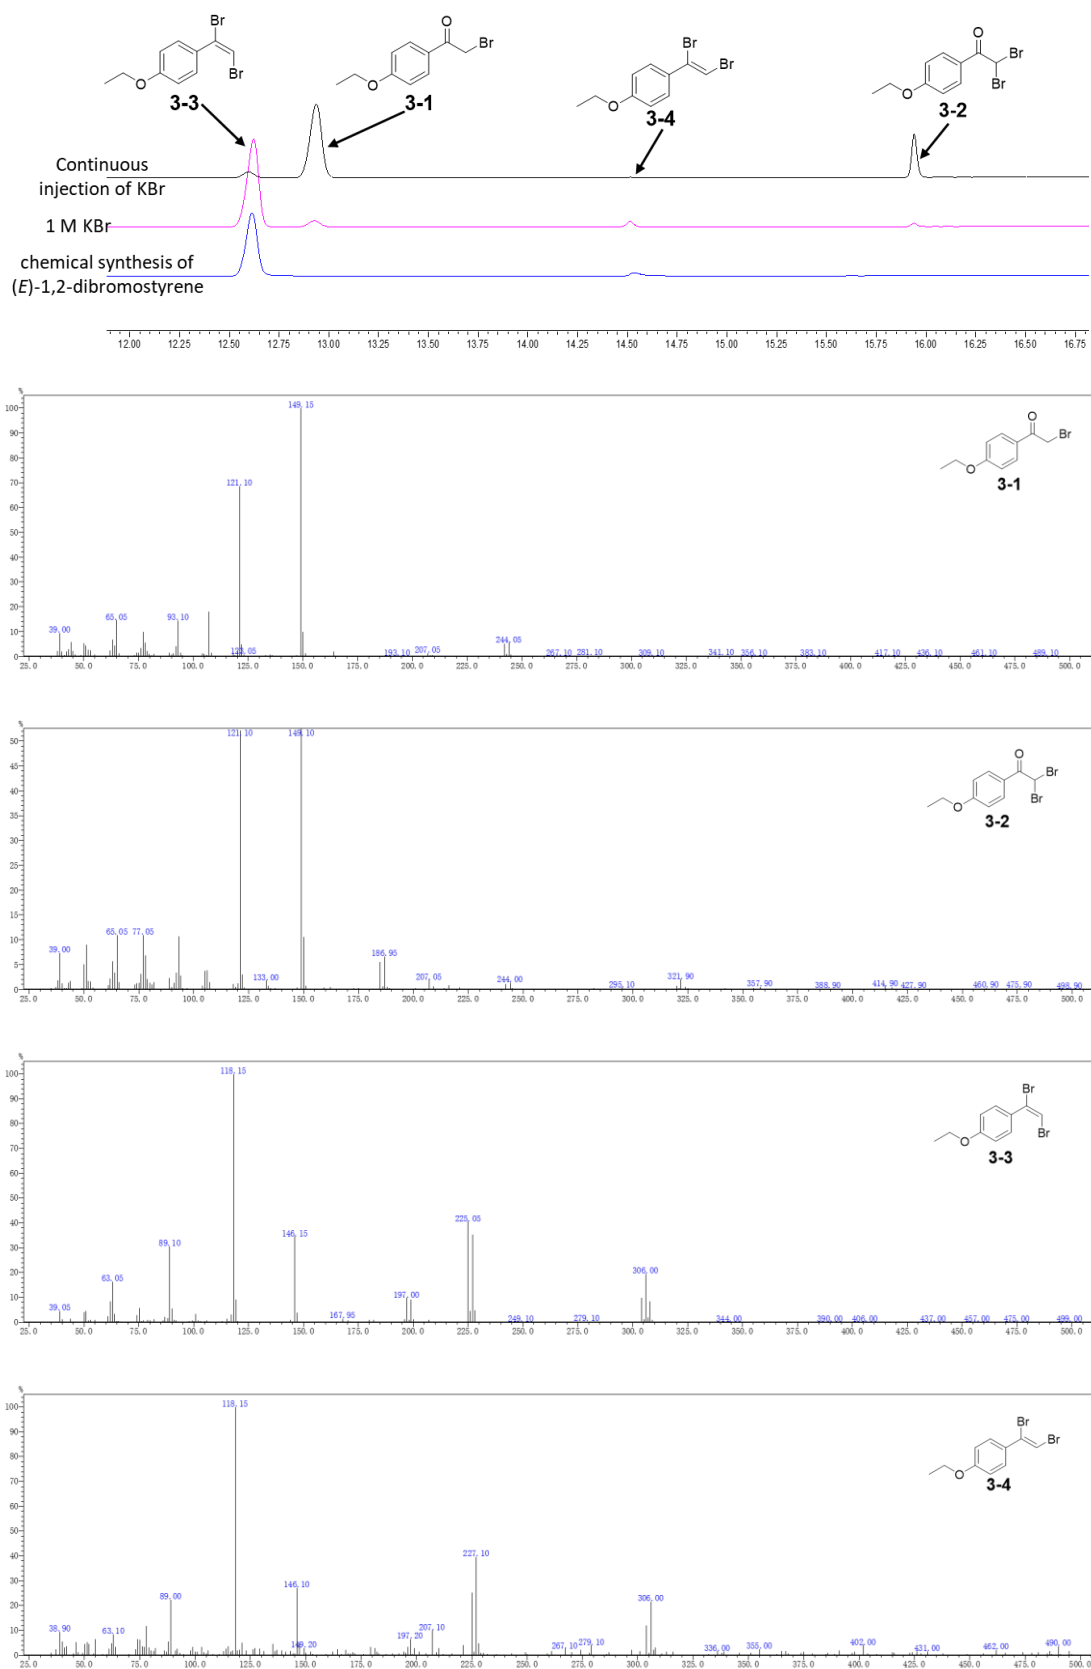

**Figure S6.** Representative GC and Mass spectrum of **3-1**, **3-2**, **3-3**, **3-4**

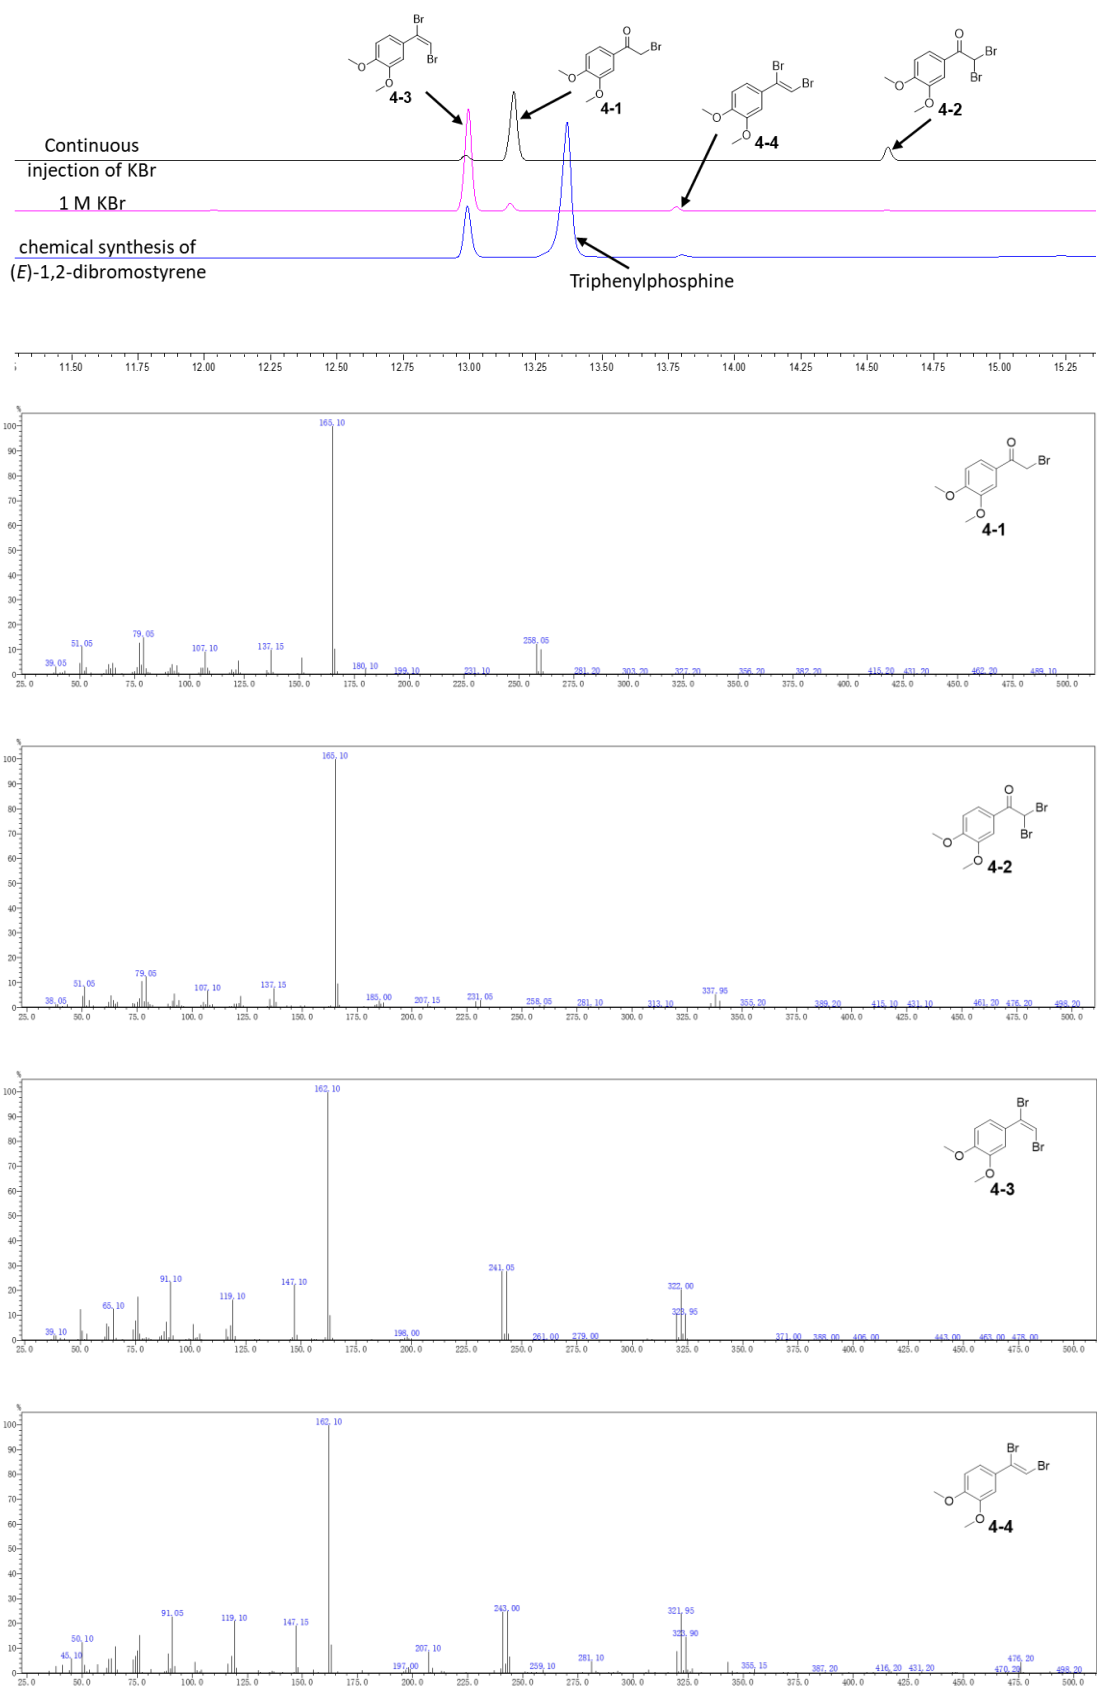

**Figure S7. Representative GC and Mass spectrum of 4-1, 4-2, 4-3, 4-4**

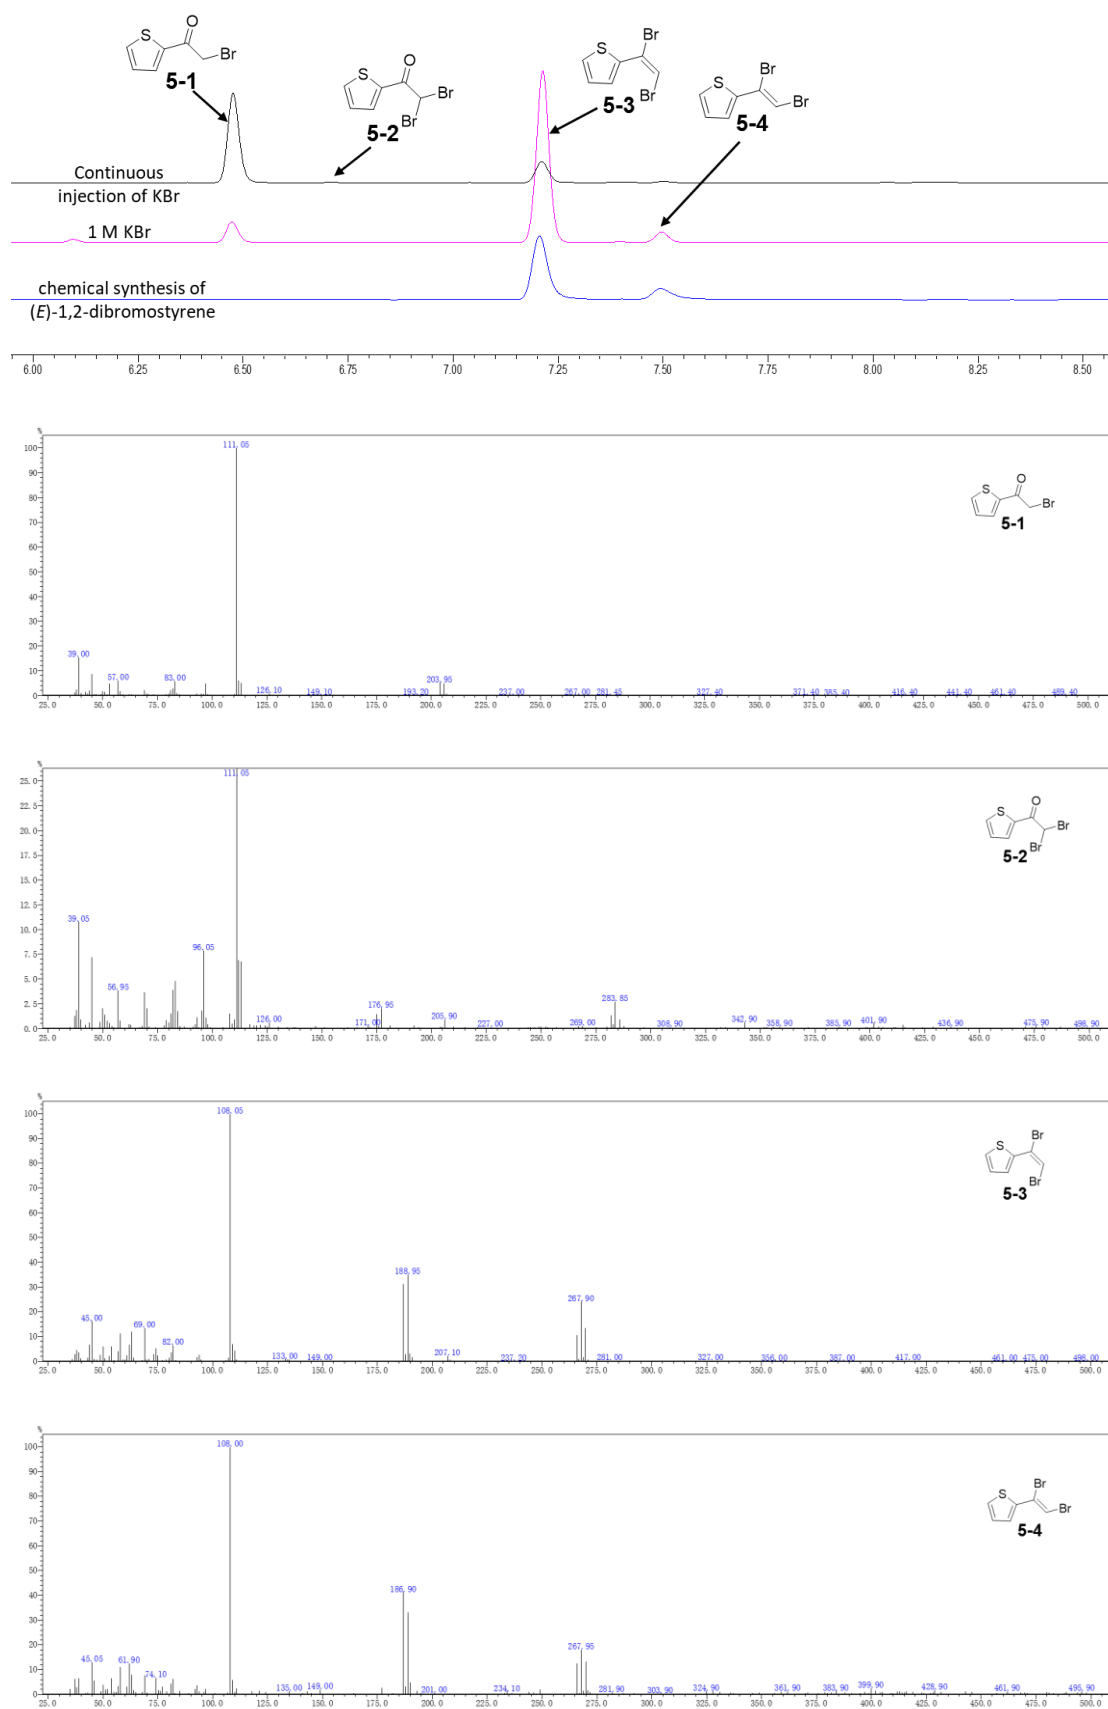

**Figure S8.** Representative GC and Mass spectrum of 5-1, 5-2, 5-3, 5-4

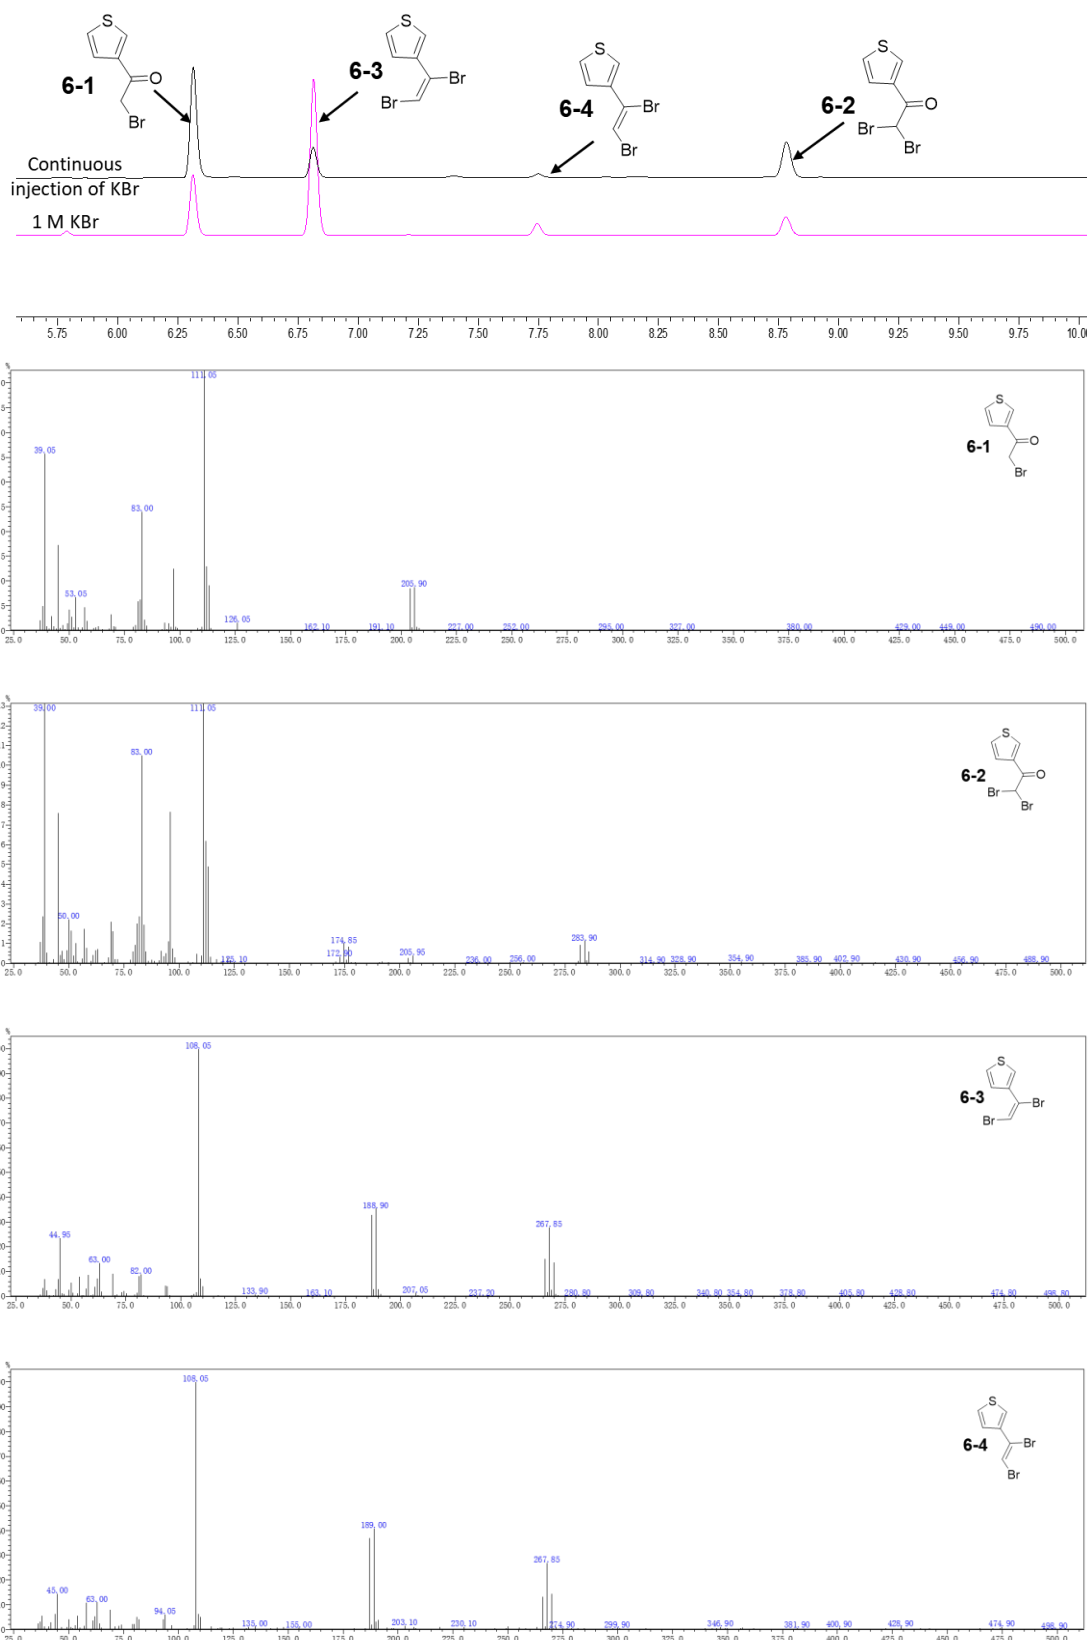

**Figure S9. Representative GC and Mass spectrum of 6-1, 6-2, 6-3, 6-4**

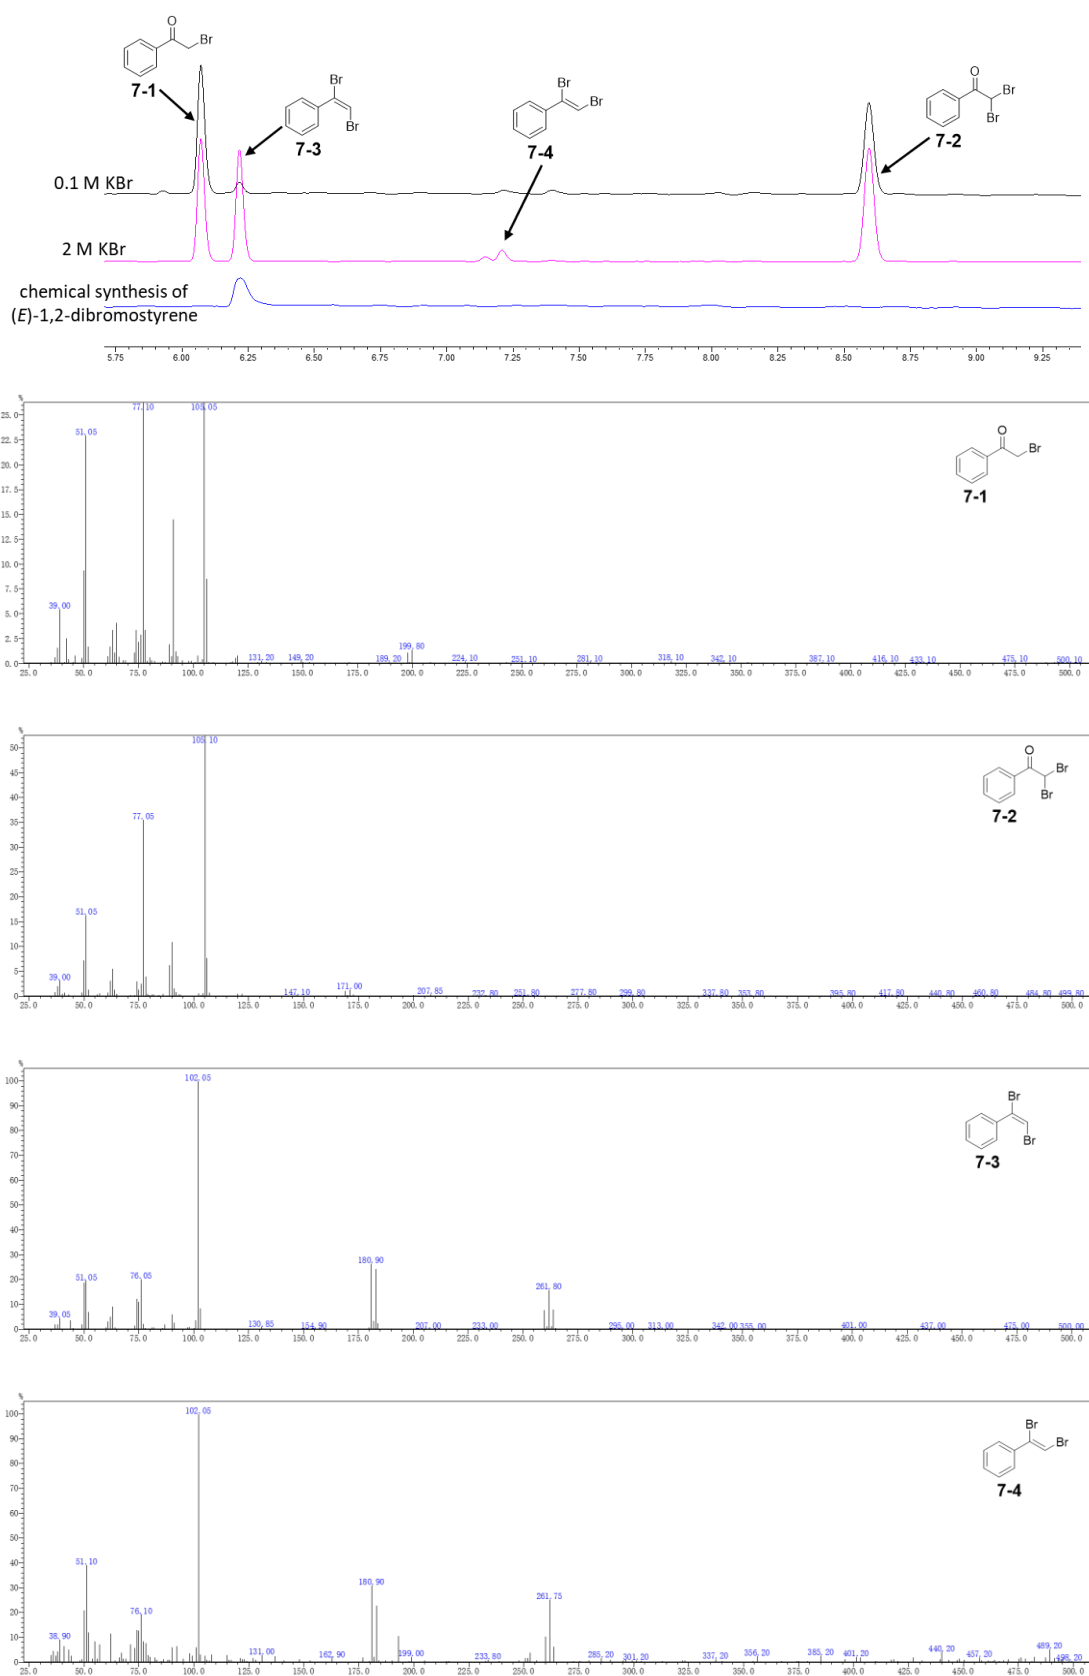

**Figure S10.** Representative GC and Mass spectrum of 7-1, 7-2, 7-3, 7-4

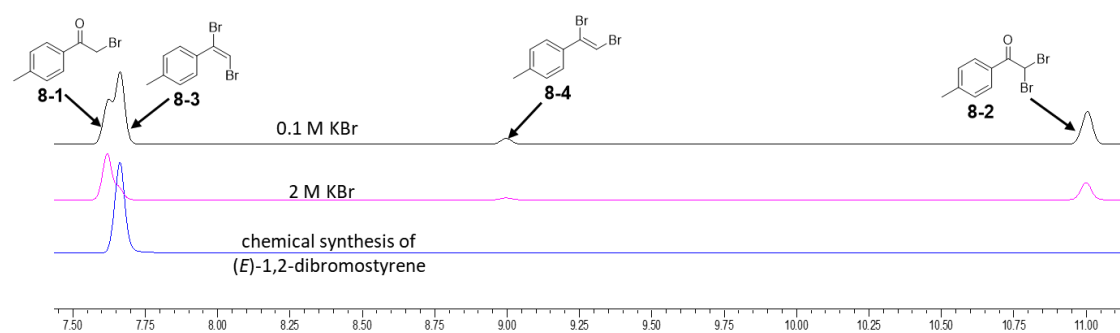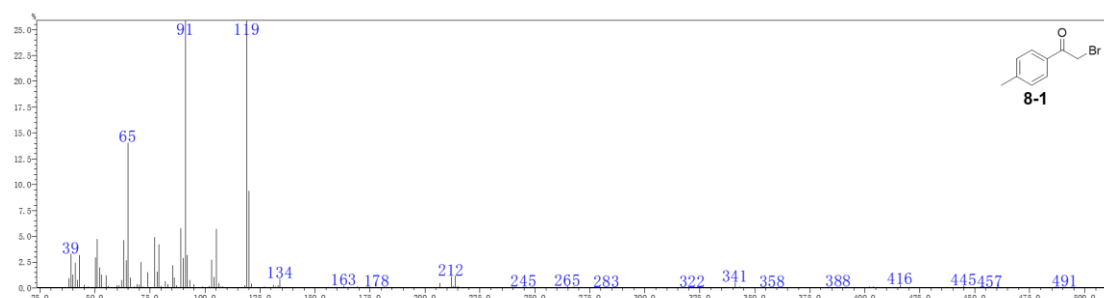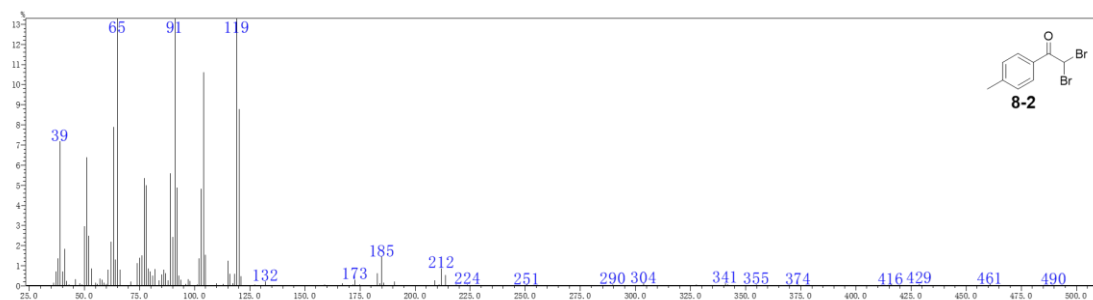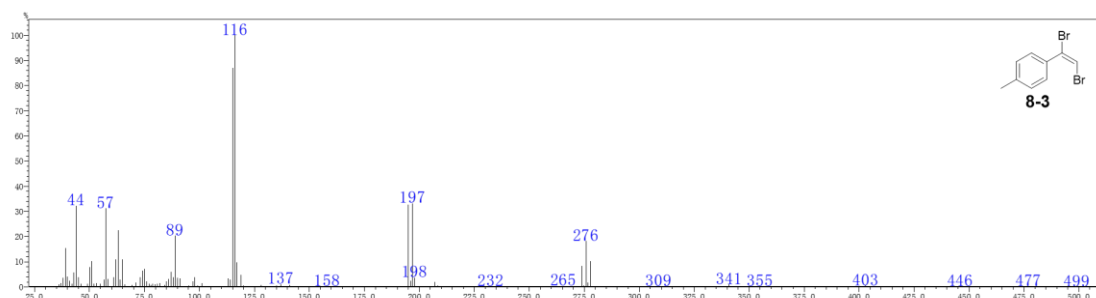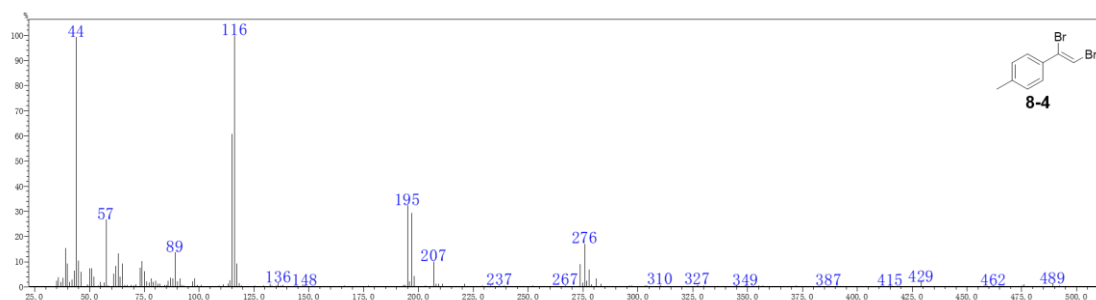

**Figure S11. Representative GC and Mass spectrum of 8-1, 8-2, 8-3, 8-4**

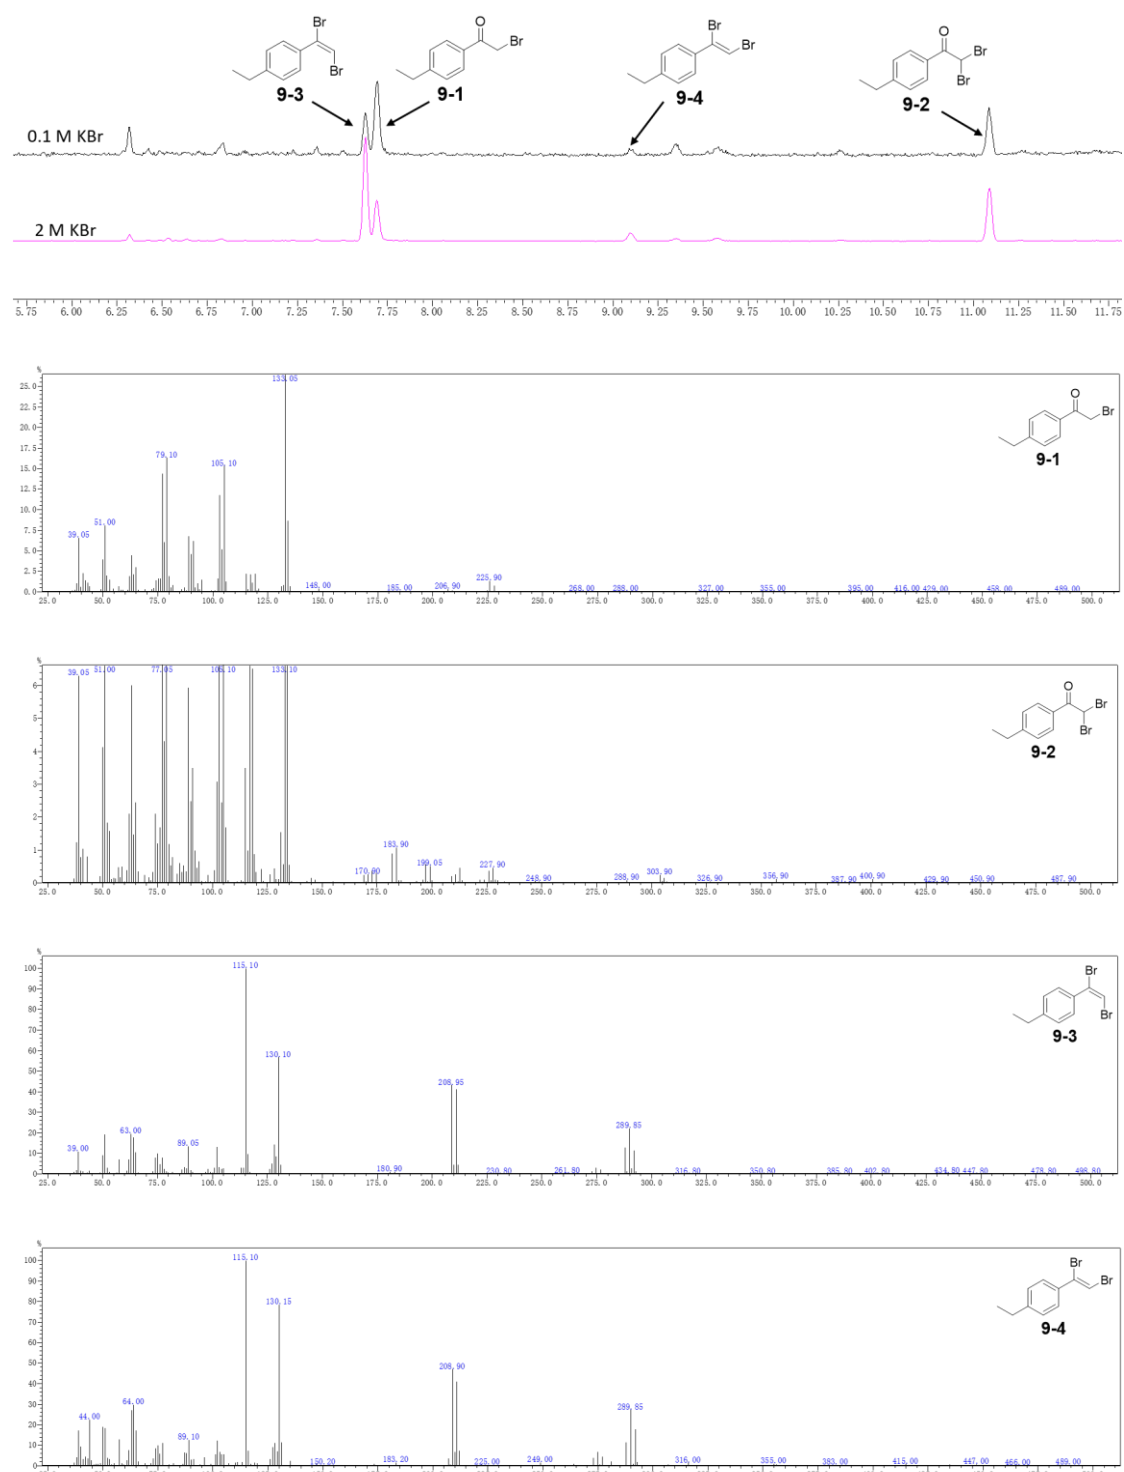

**Figure S12.** Representative GC and Mass spectrum of **9-1**, **9-2**, **9-3**, **9-4**

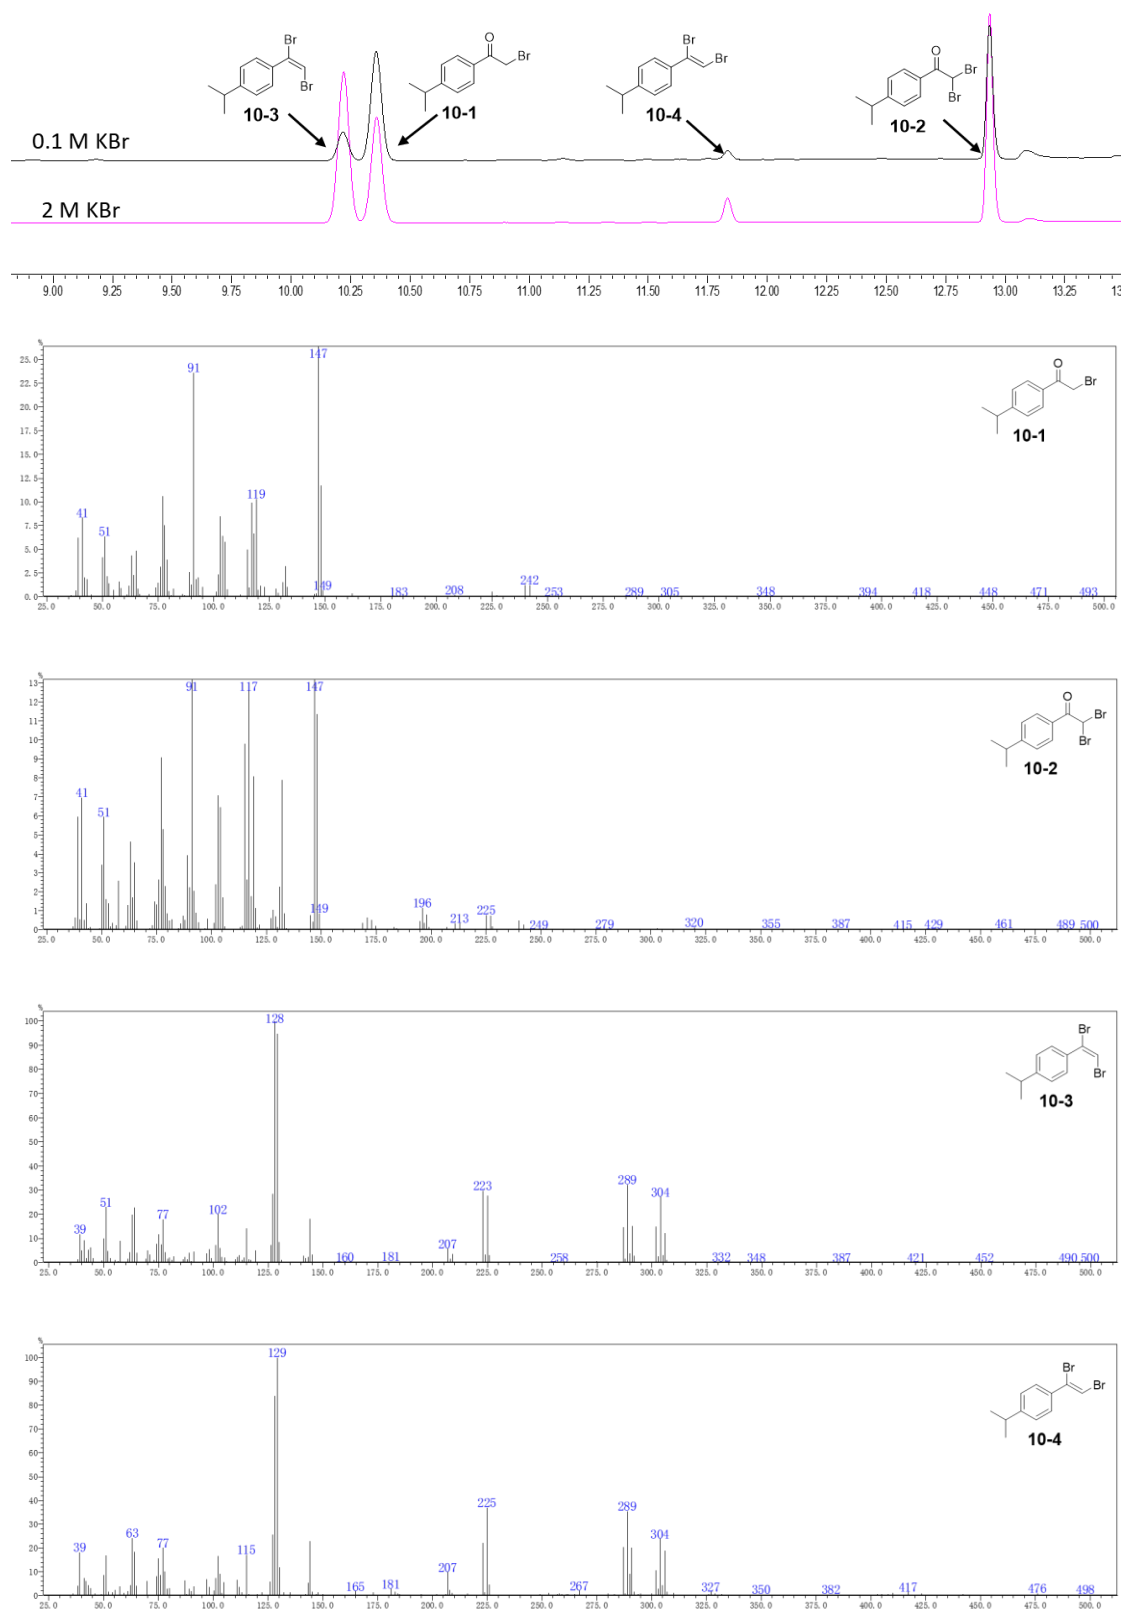

**Figure S13.** Representative GC and Mass spectrum of 10-1, 10-2, 10-3, 10-4

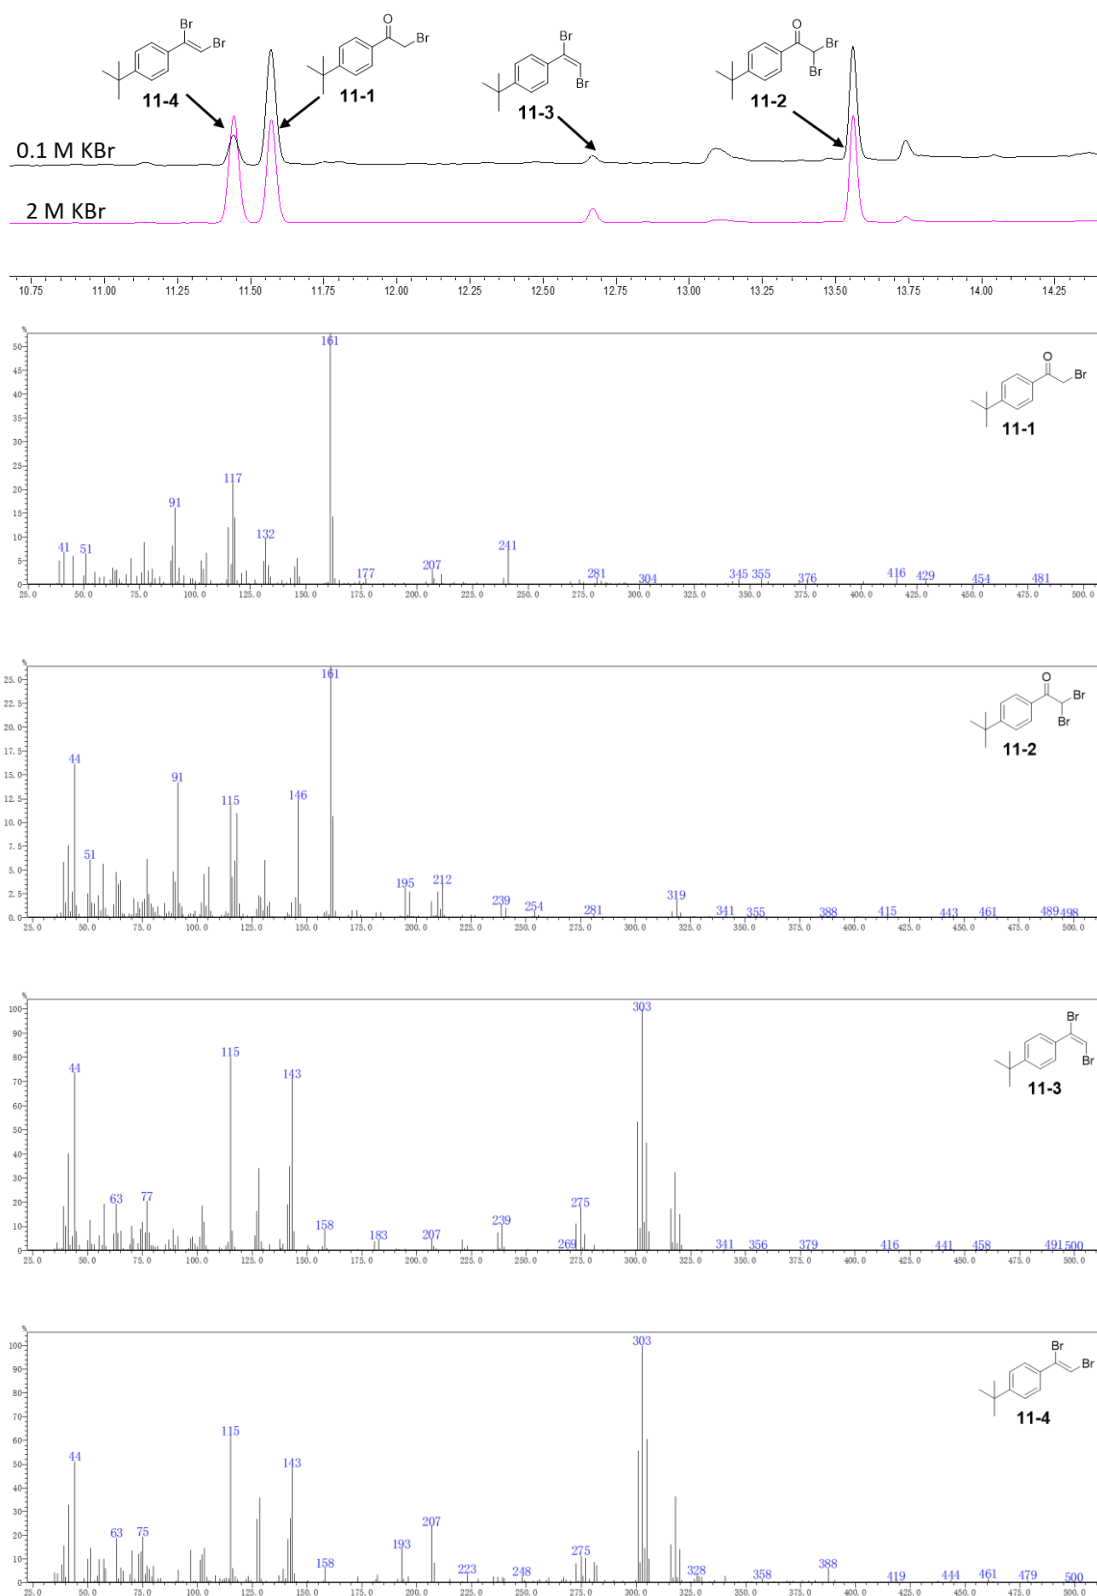

**Figure S14.** Representative GC and Mass spectrum of **11-1**, **11-2**, **11-3**, **11-4**

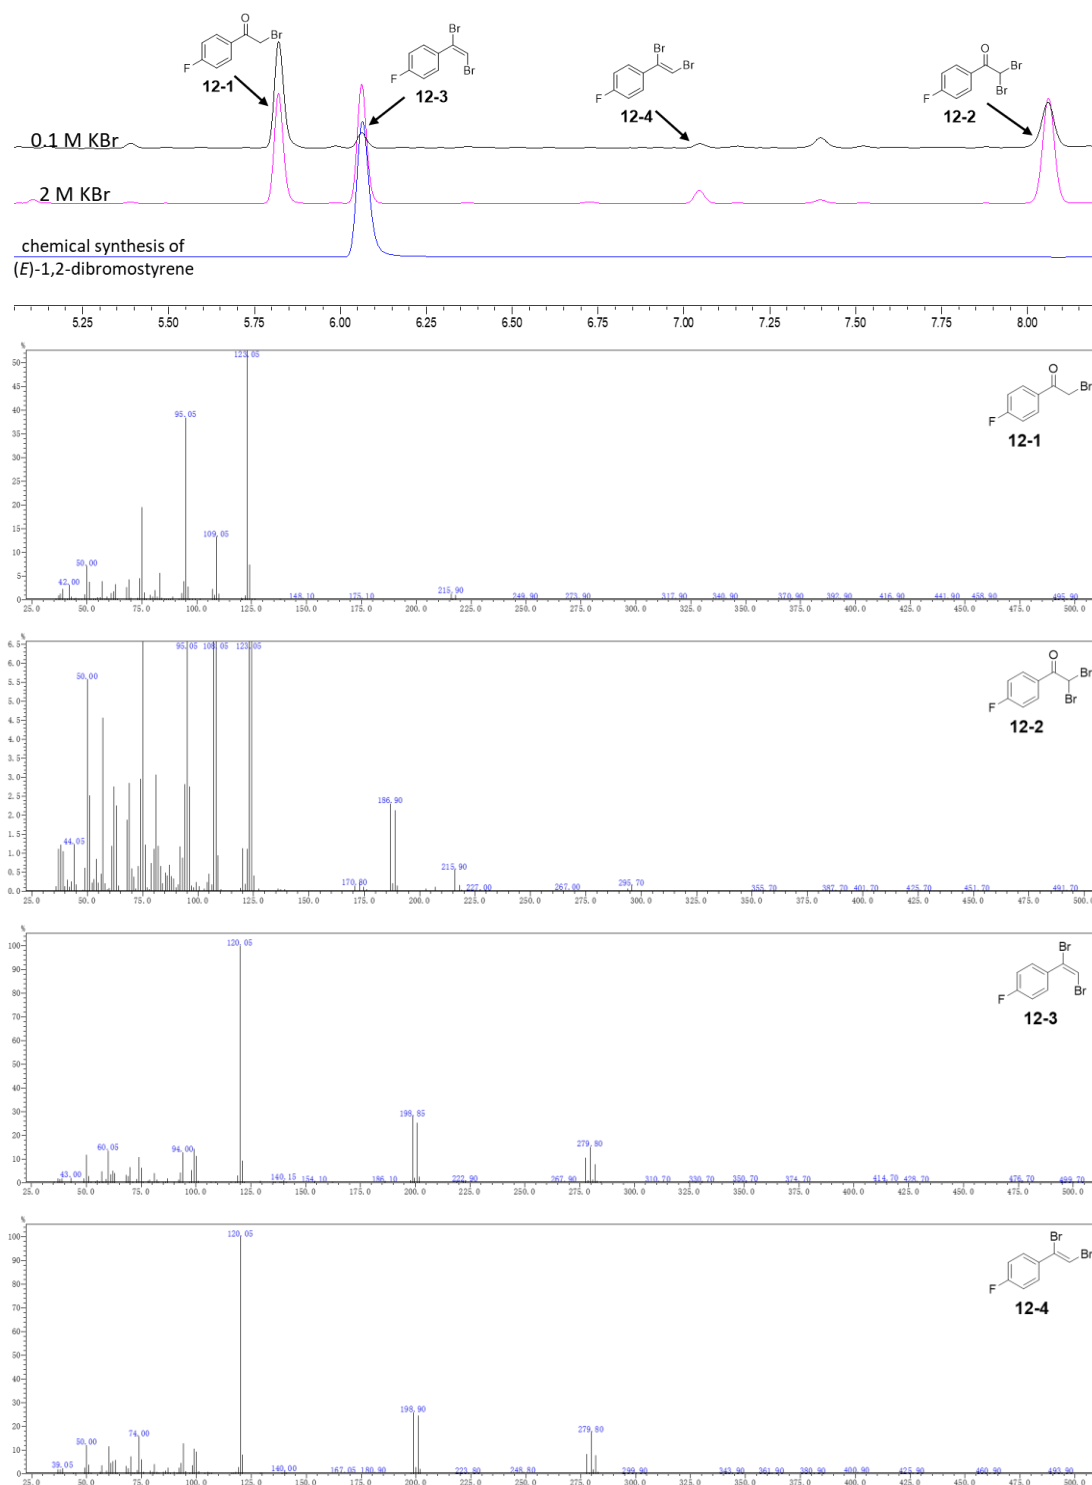

**Figure S15. Representative GC and Mass spectrum of 12-1, 12-2, 12-3, 12-4**

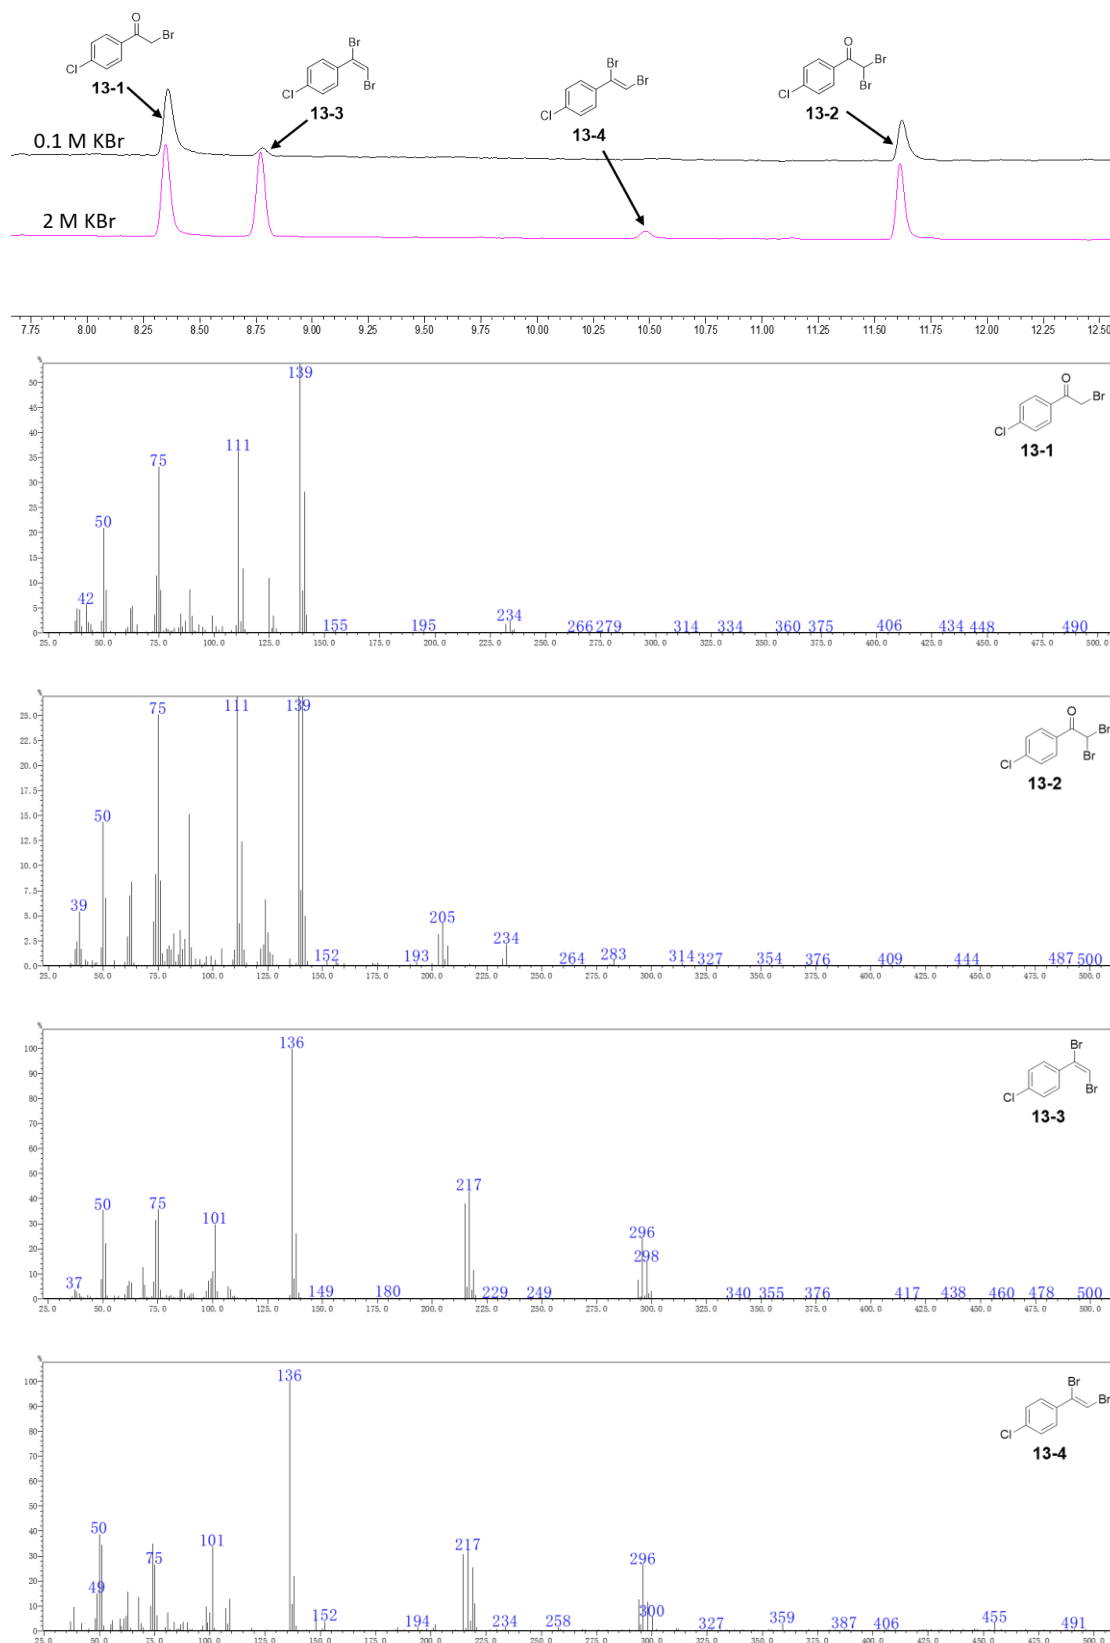

**Figure S16. Representative GC and Mass spectrum of 13-1, 13-2, 13-3, 13-4**

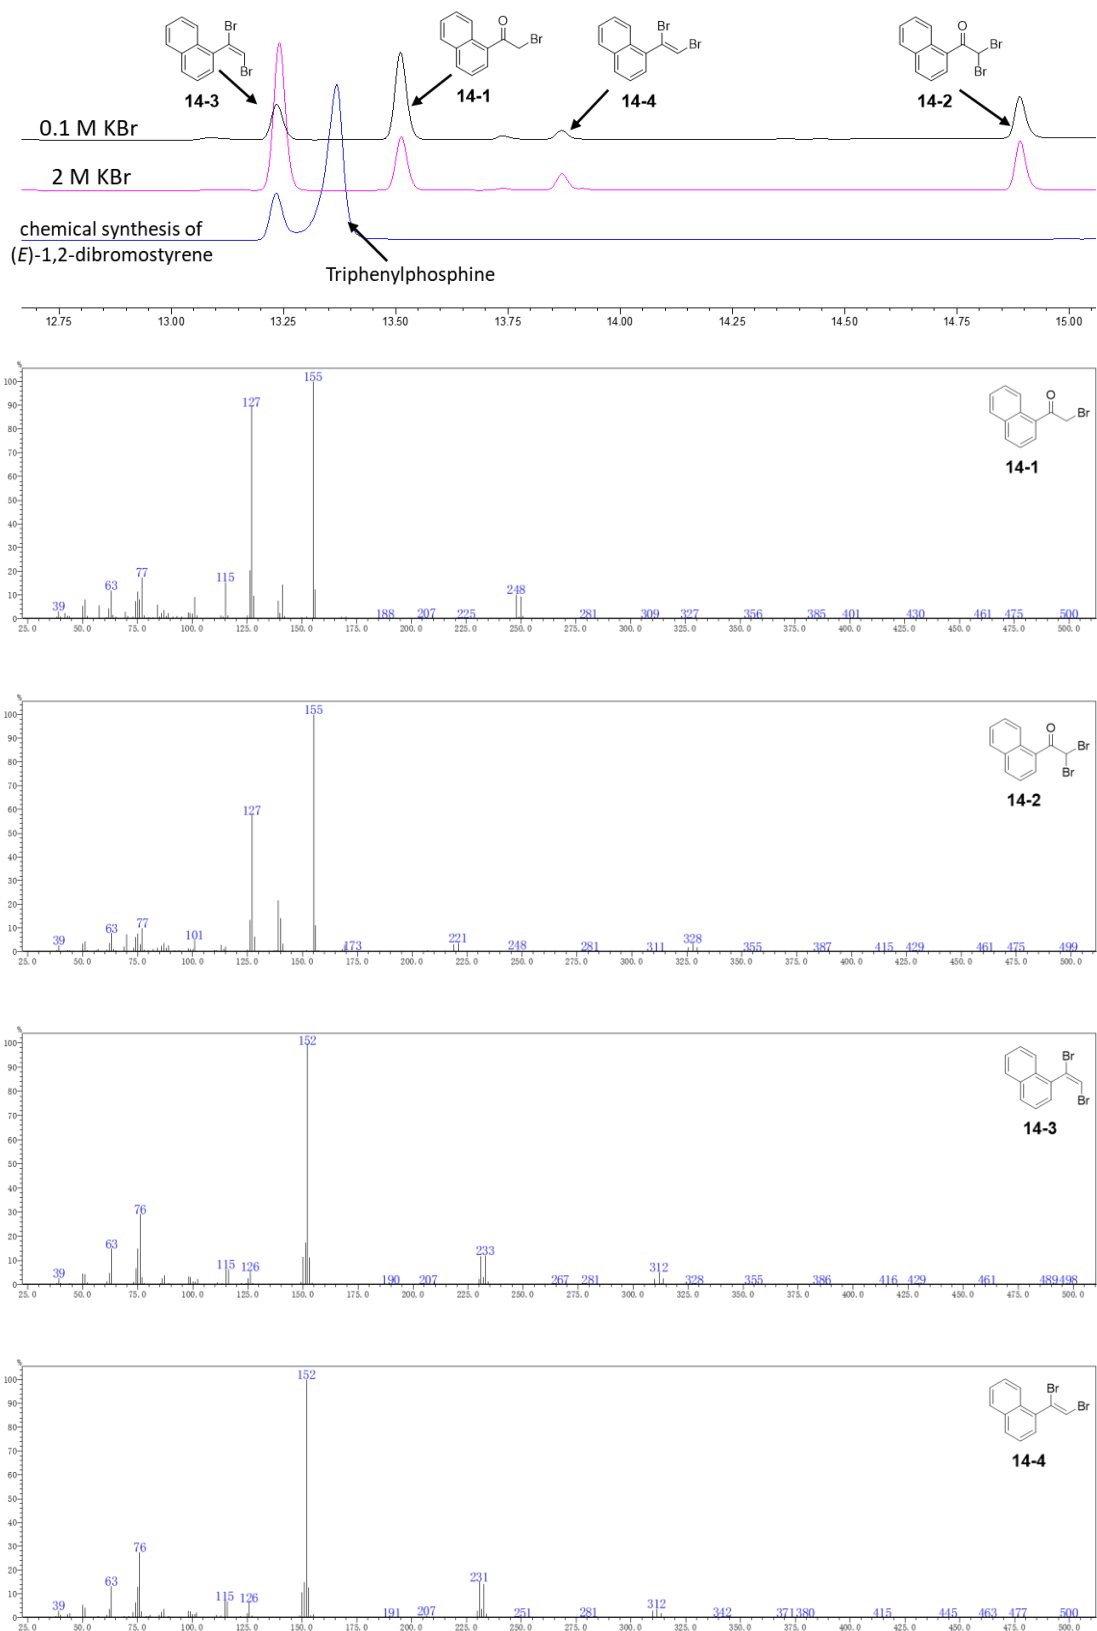

**Figure S17. Representative GC and Mass spectrum of 14-1, 14-2, 14-3, 14-4**

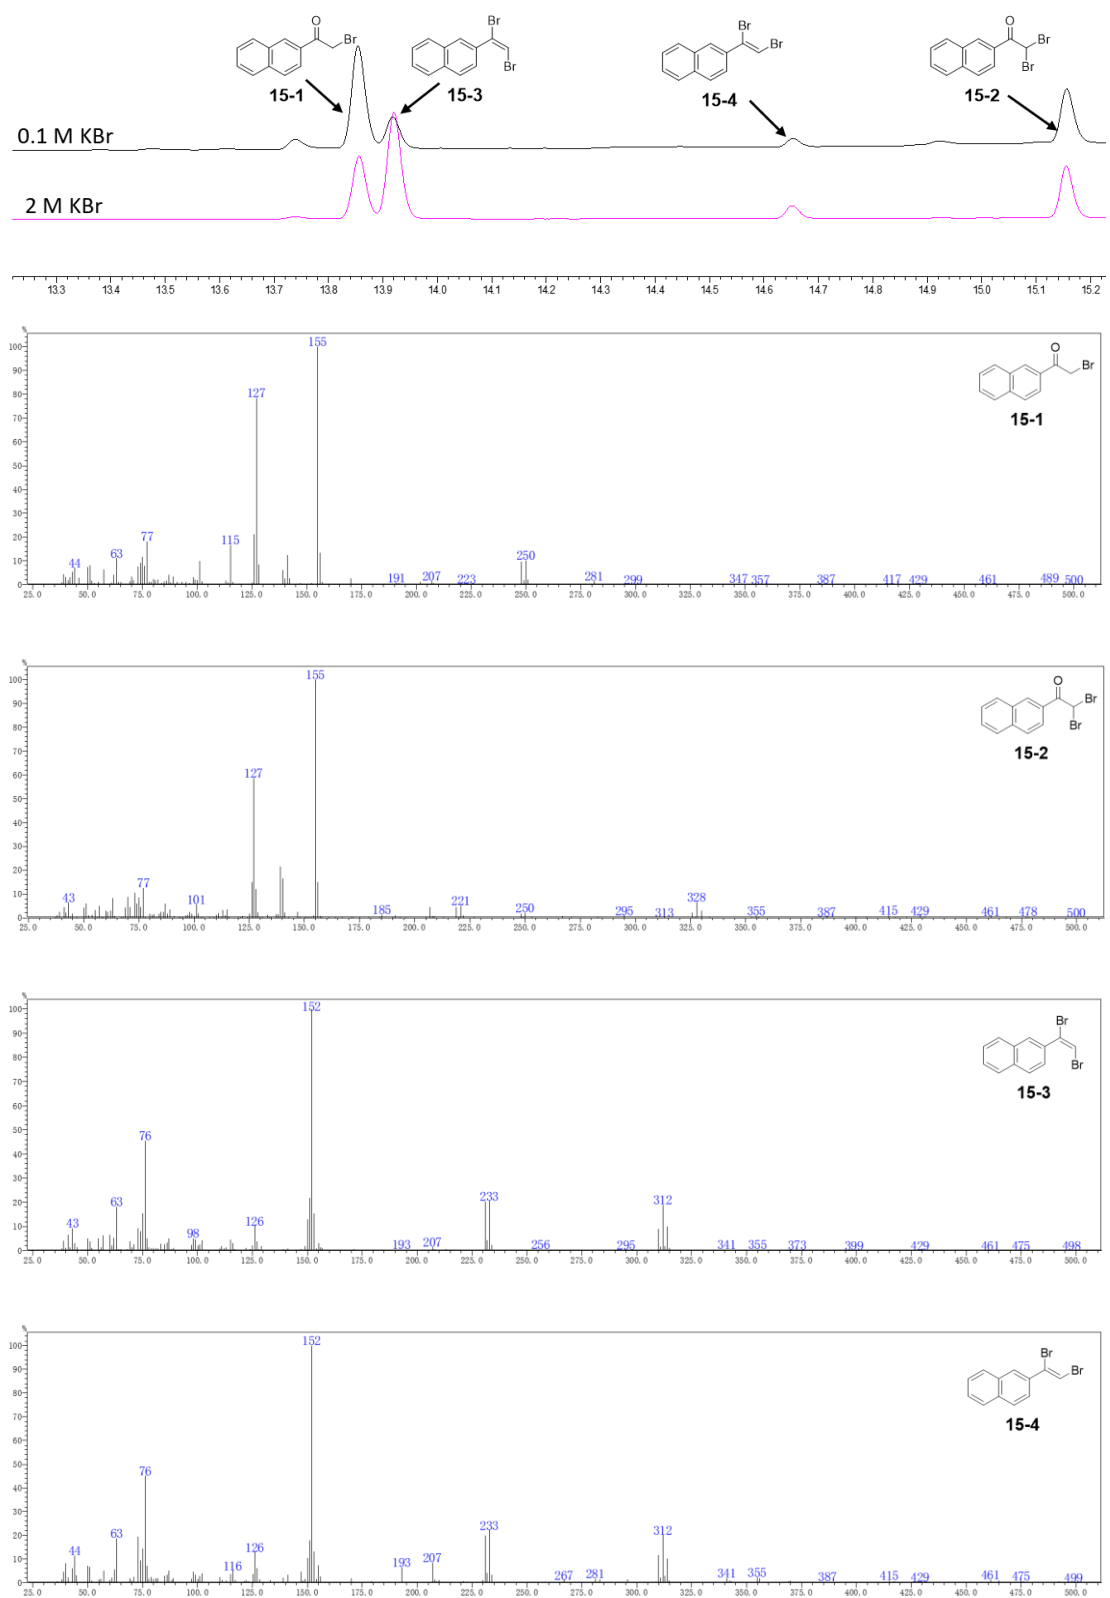

**Figure S18.** Representative GC and Mass spectrum of **15-1**, **15-2**, **15-3**, **15-4**

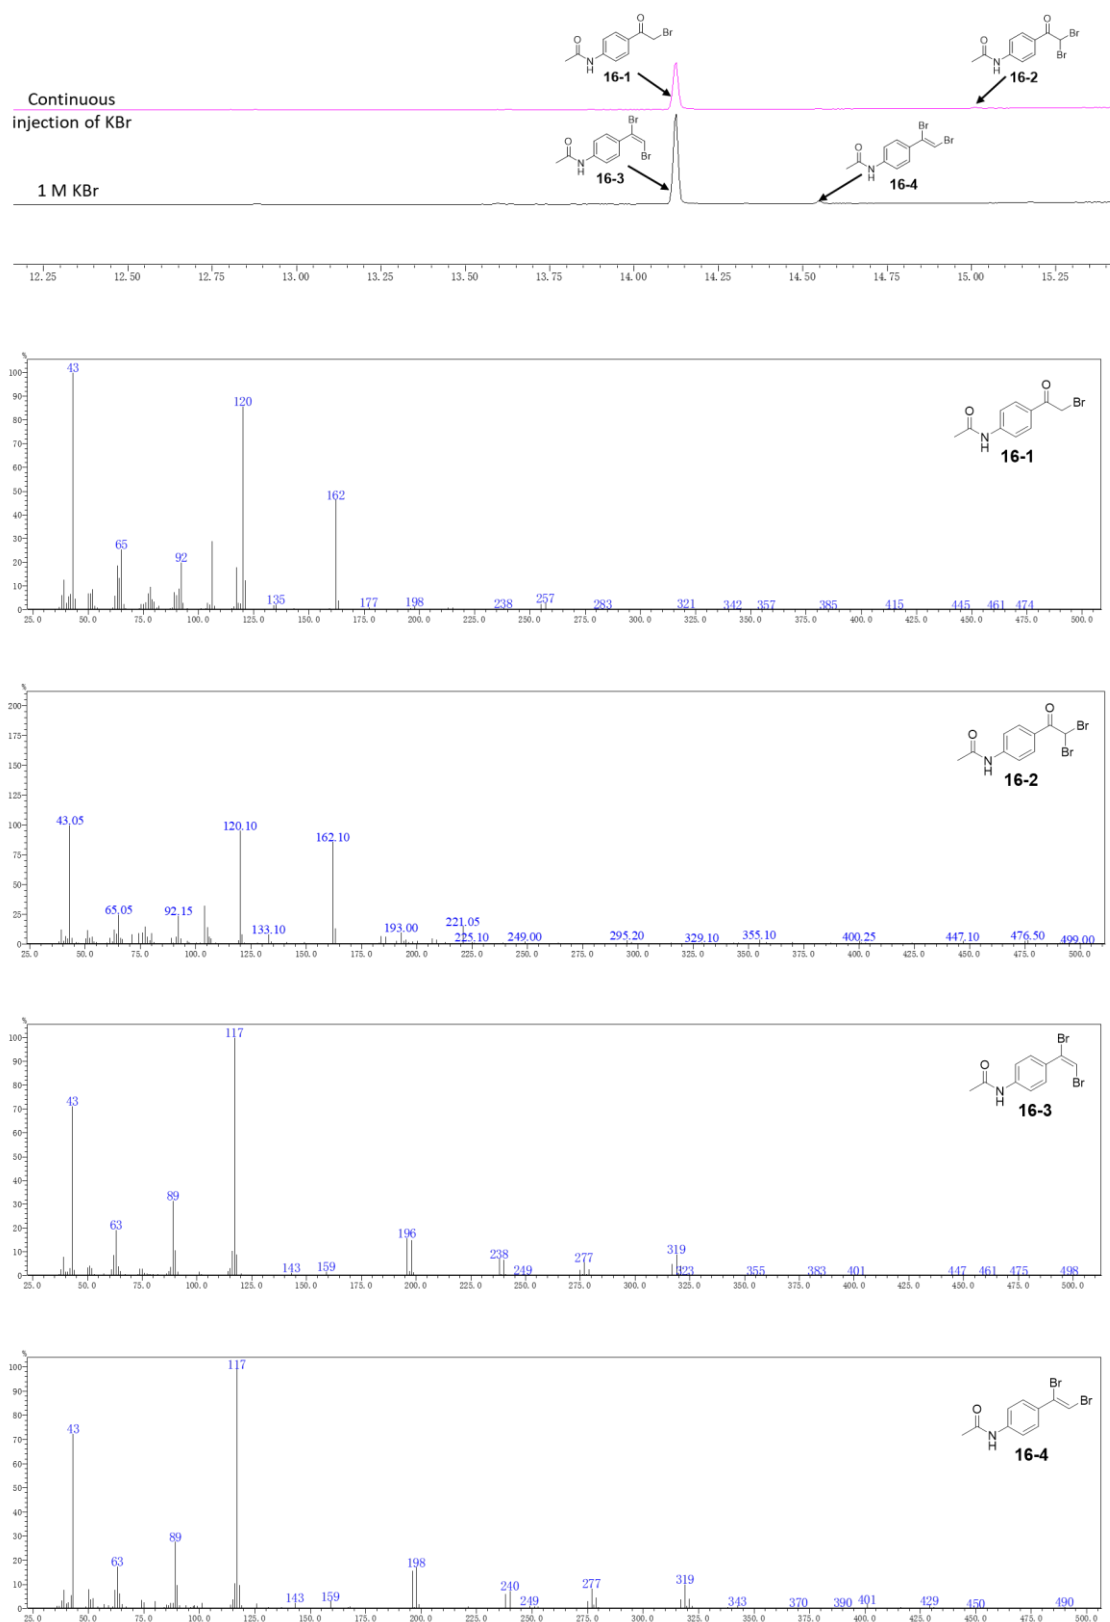

**Figure S19. Representative GC and Mass spectrum of 16-1, 16-2, 16-3, 16-4**

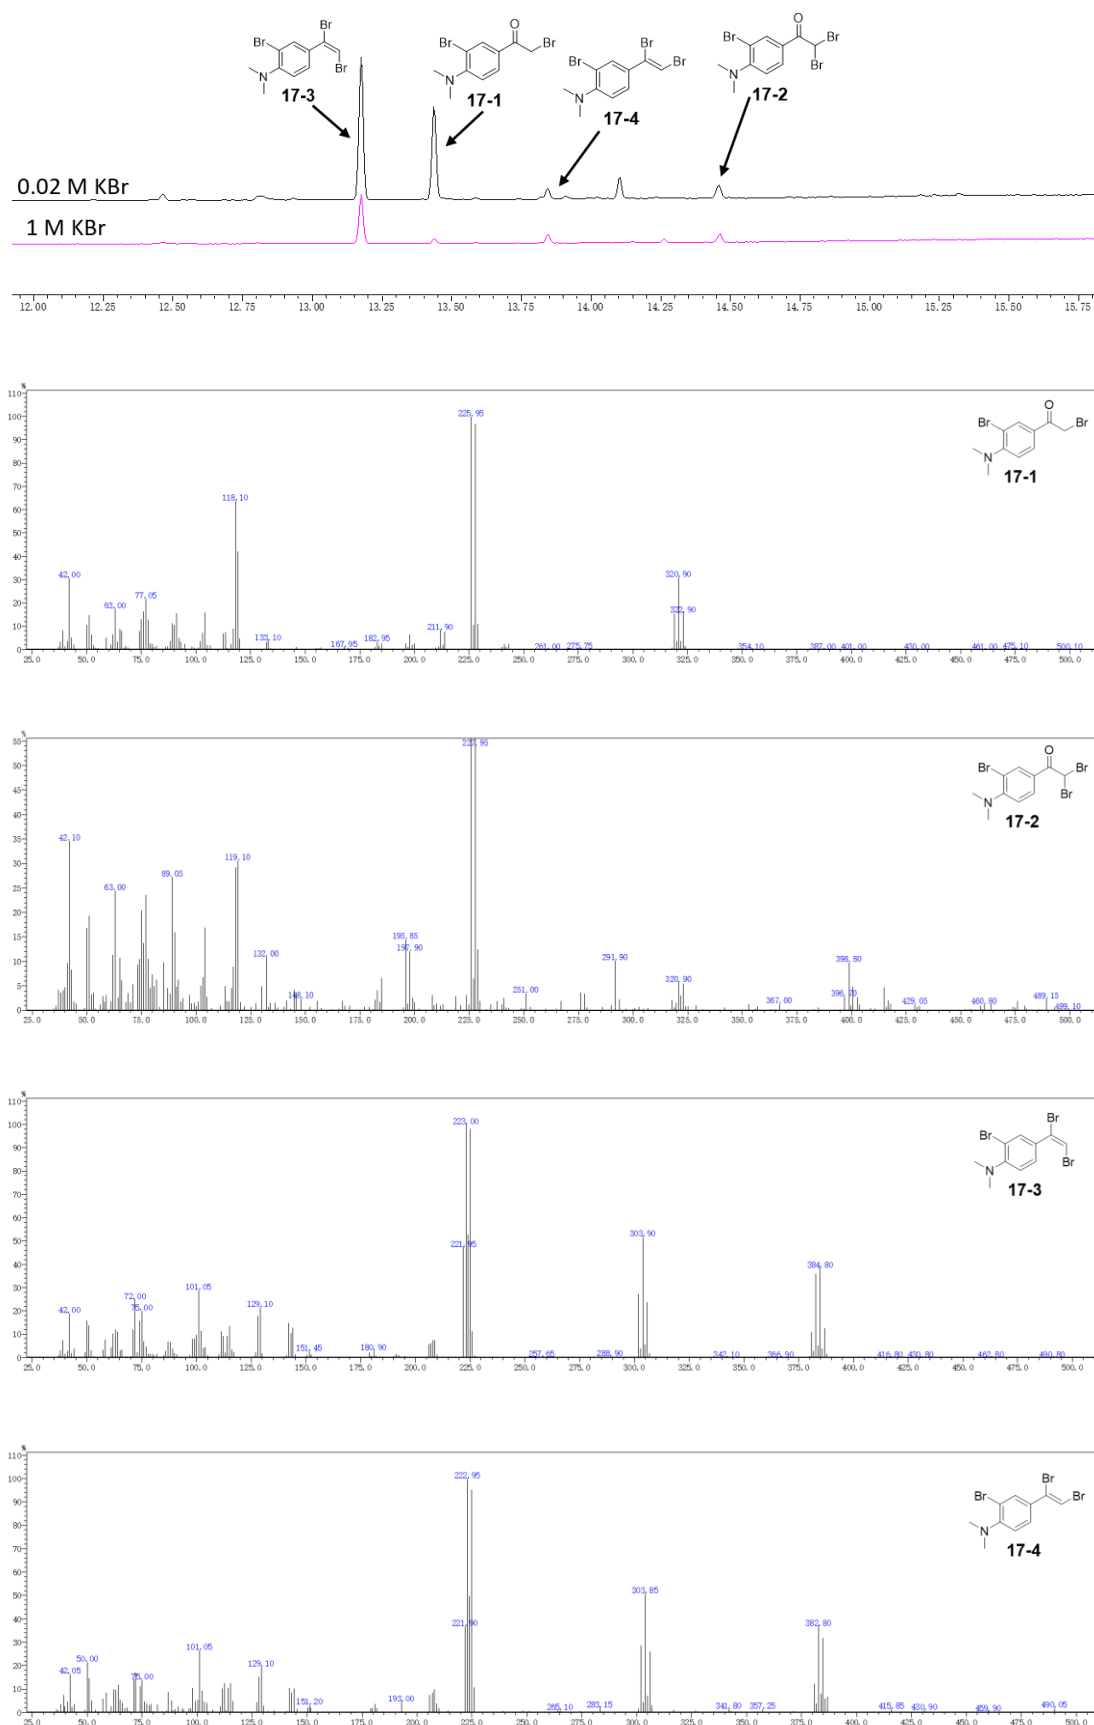

**Figure S20.** Representative GC and Mass spectrum of **17-1**, **17-2**, **17-3**, **17-4**.

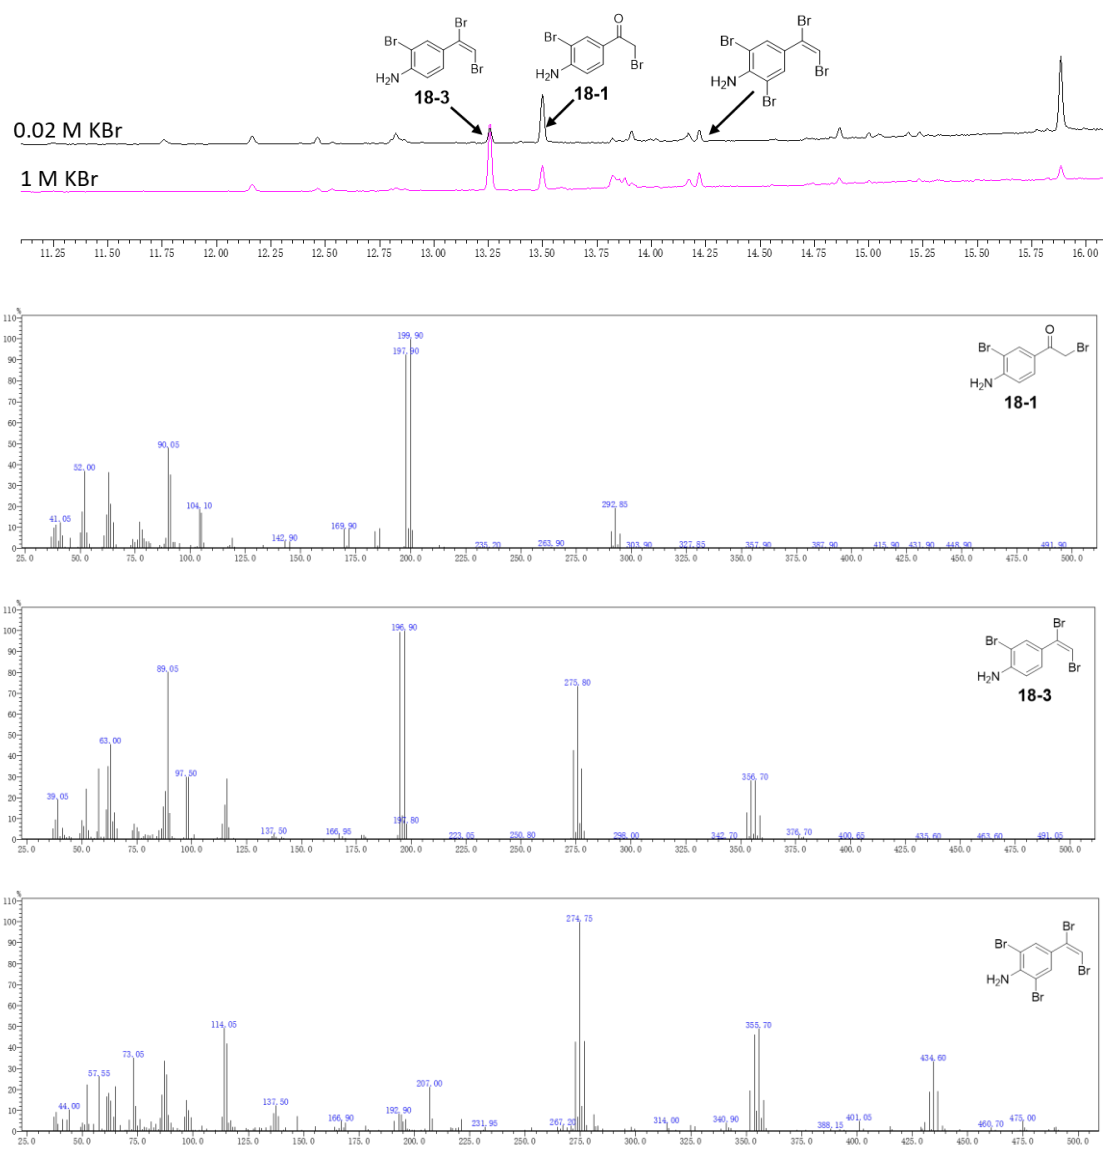

**Figure S21.** Representative GC and Mass spectrum of **18-1**, **18-3** and byproduct.

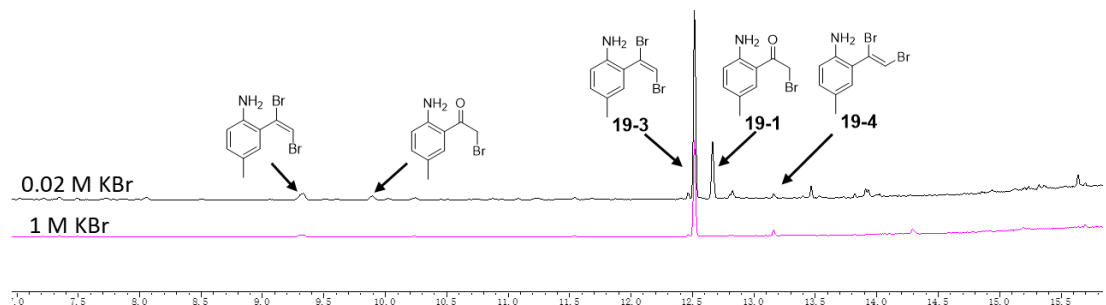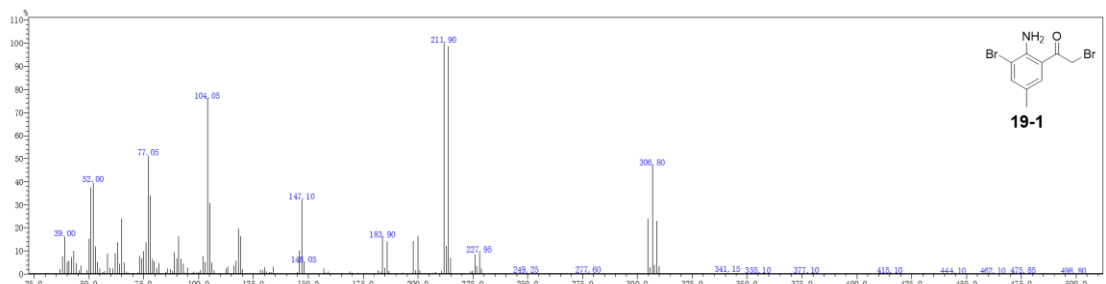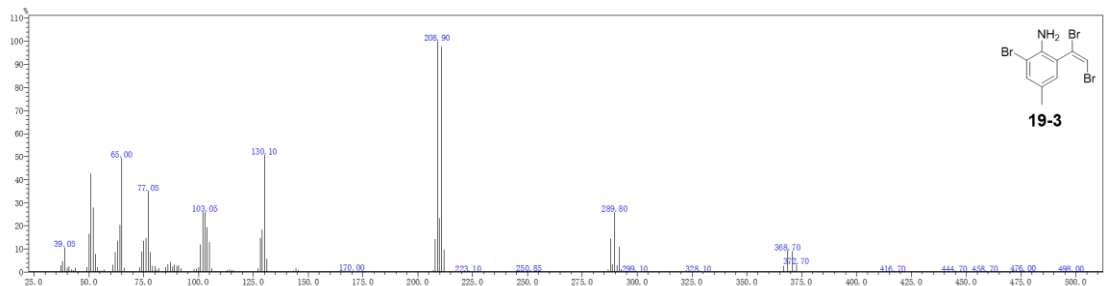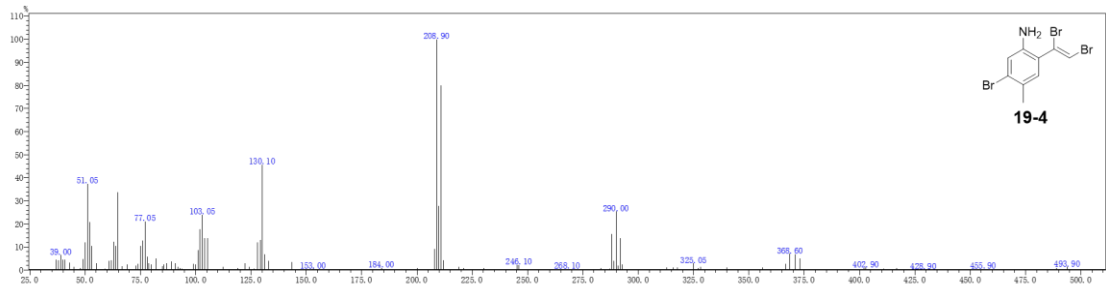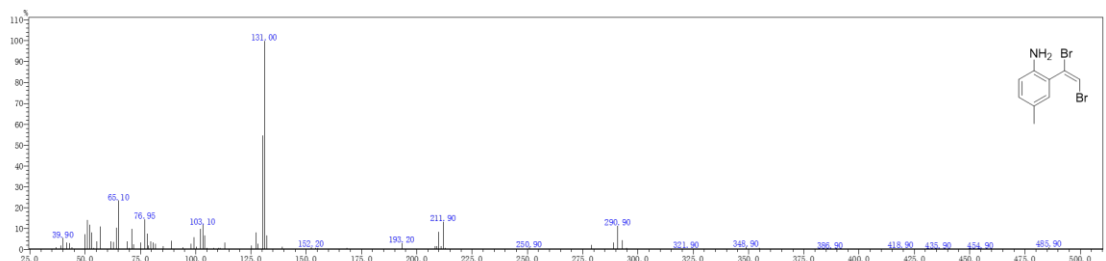

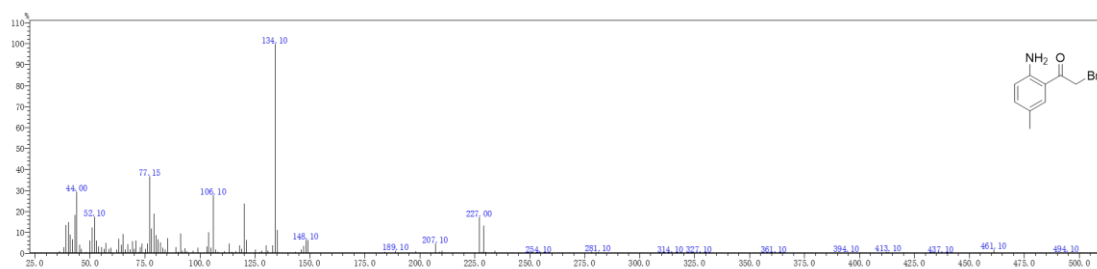

**Figure S22.** Representative GC and Mass spectrum of **19-1**, **19-3**, **19-4** and byproduct.

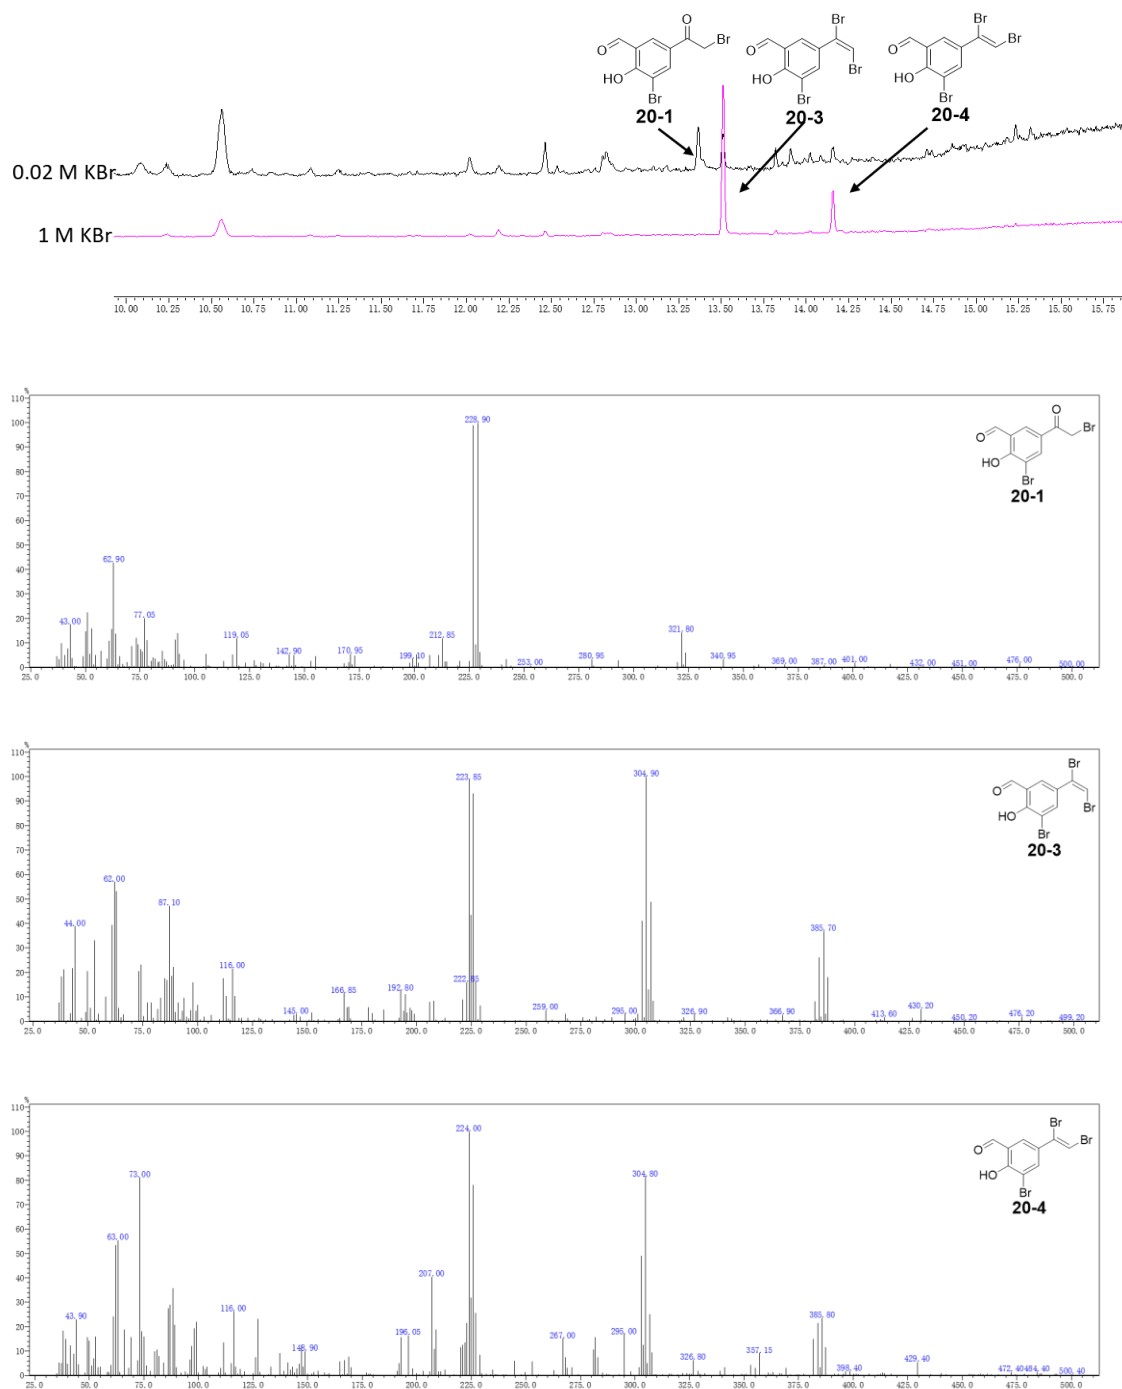

**Figure S23.** Representative GC and Mass spectrum of **20-1**, **20-3**, **20-4**.

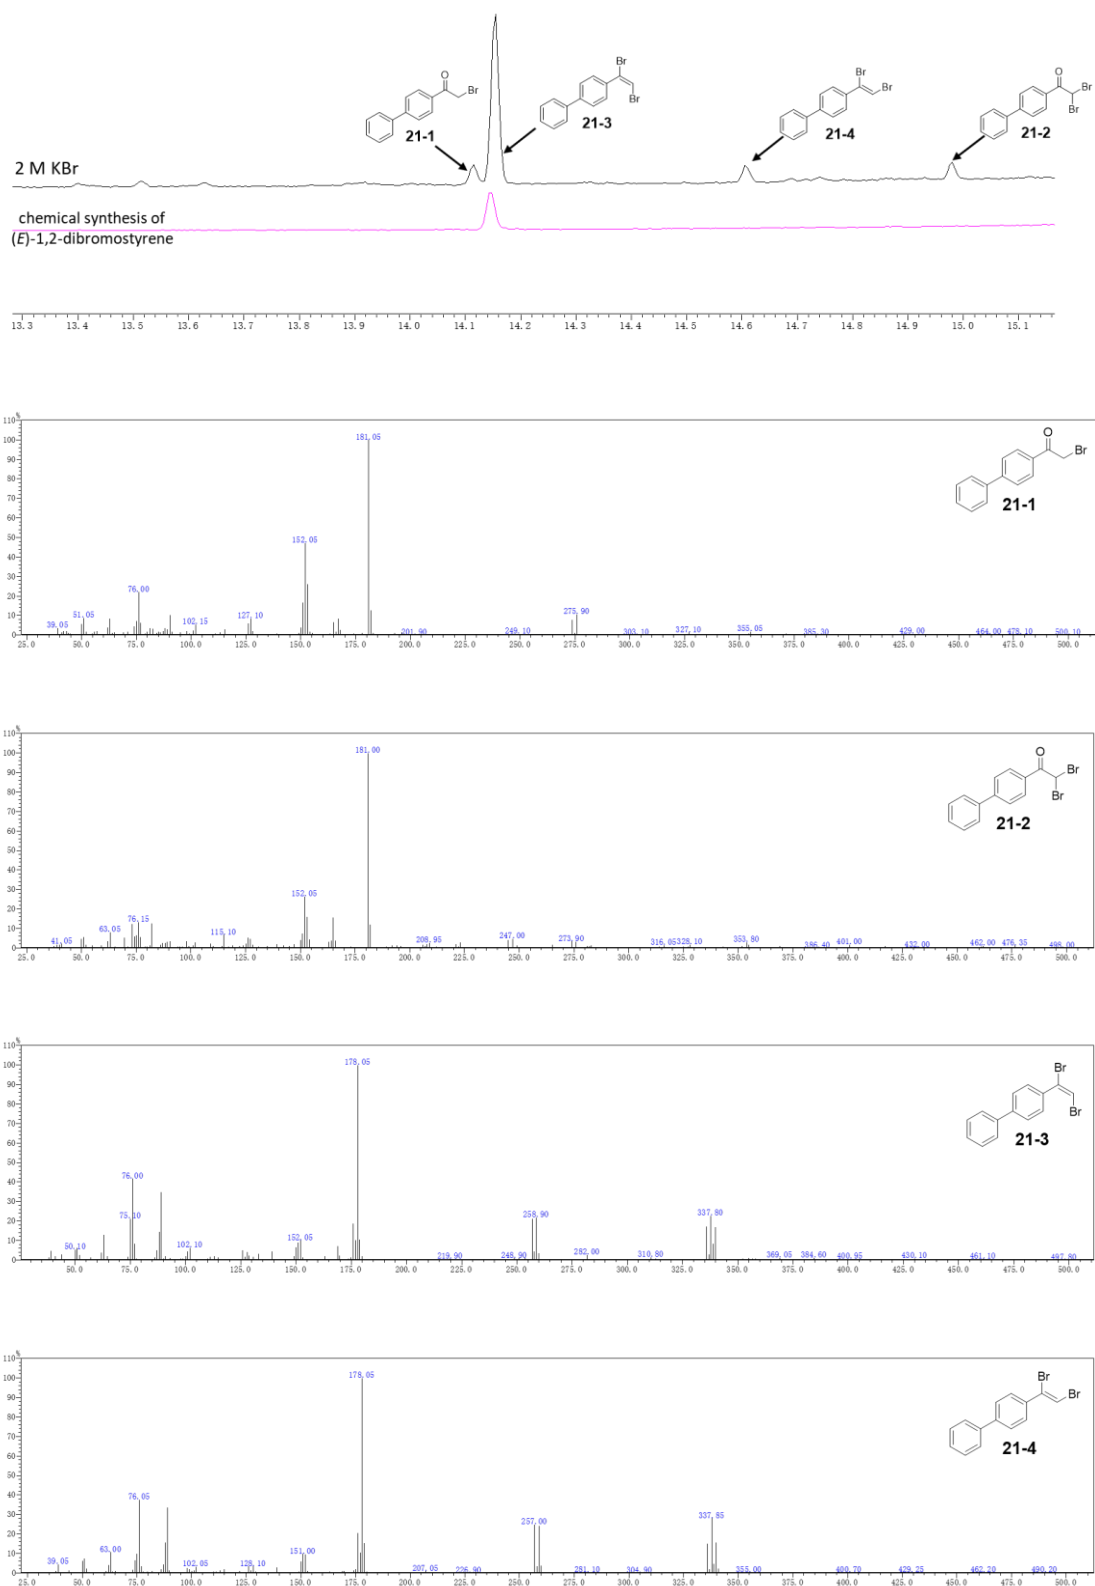

**Figure S24.** Representative GC and Mass spectrum of **21-1**, **21-2**, **21-3**, **21-4**

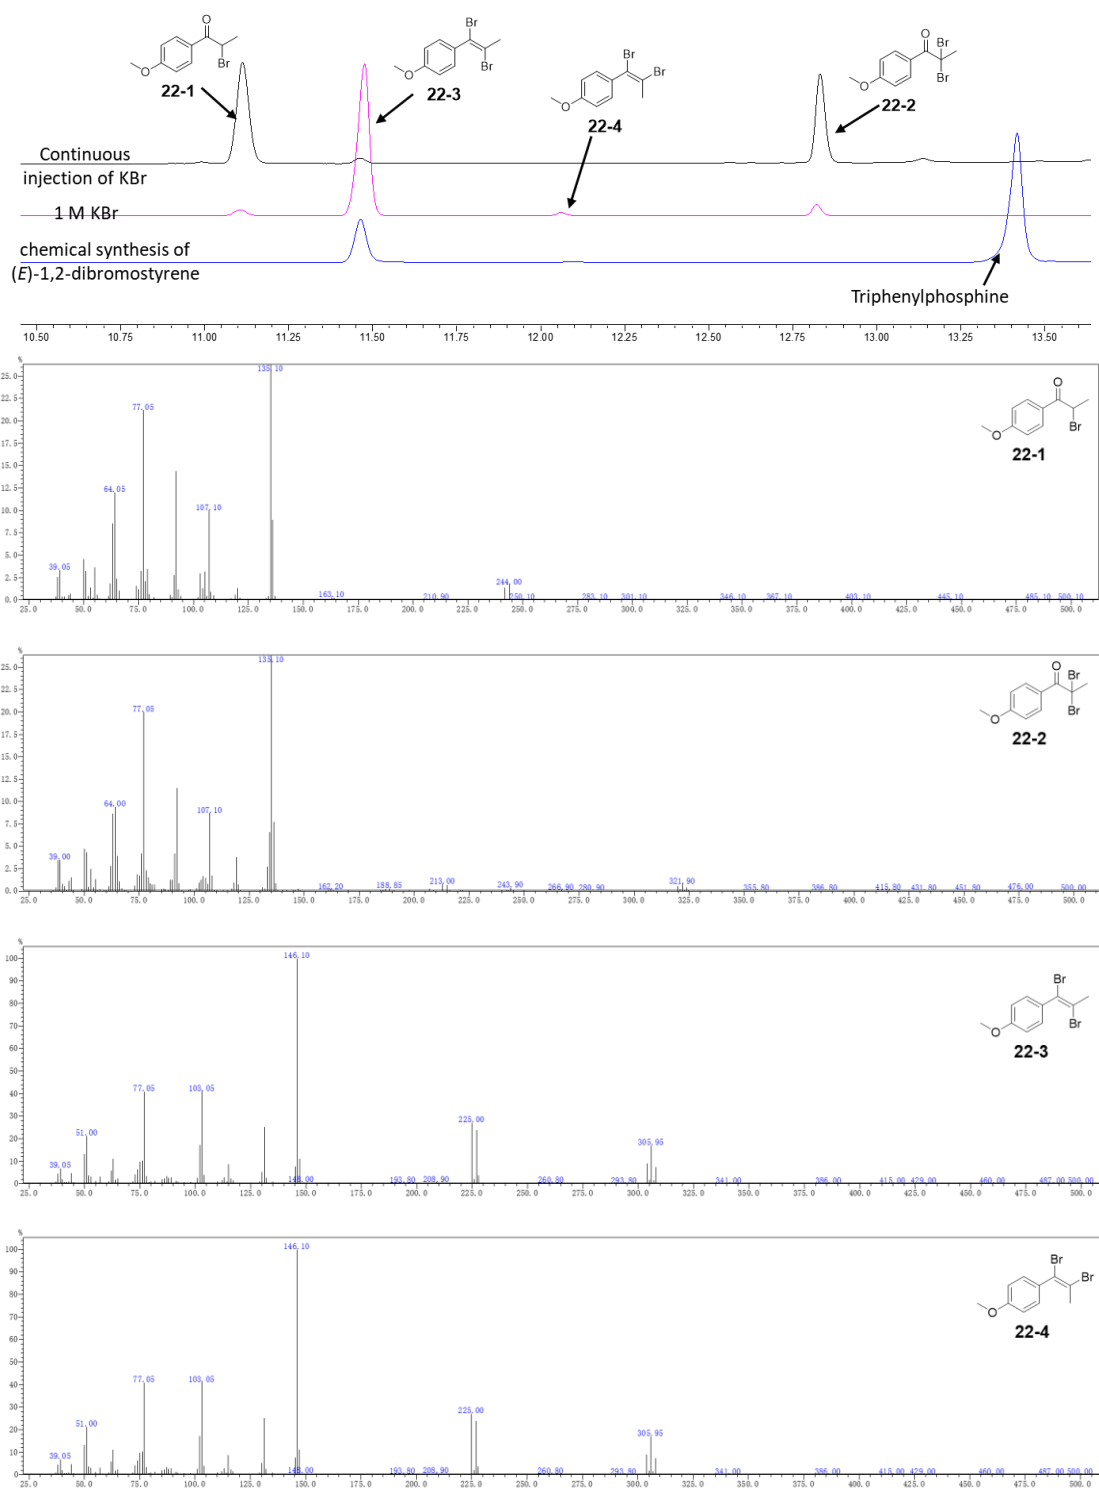

**Figure S25. Representative GC and Mass spectrum of 22-1, 22-2, 22-3, 22-4**

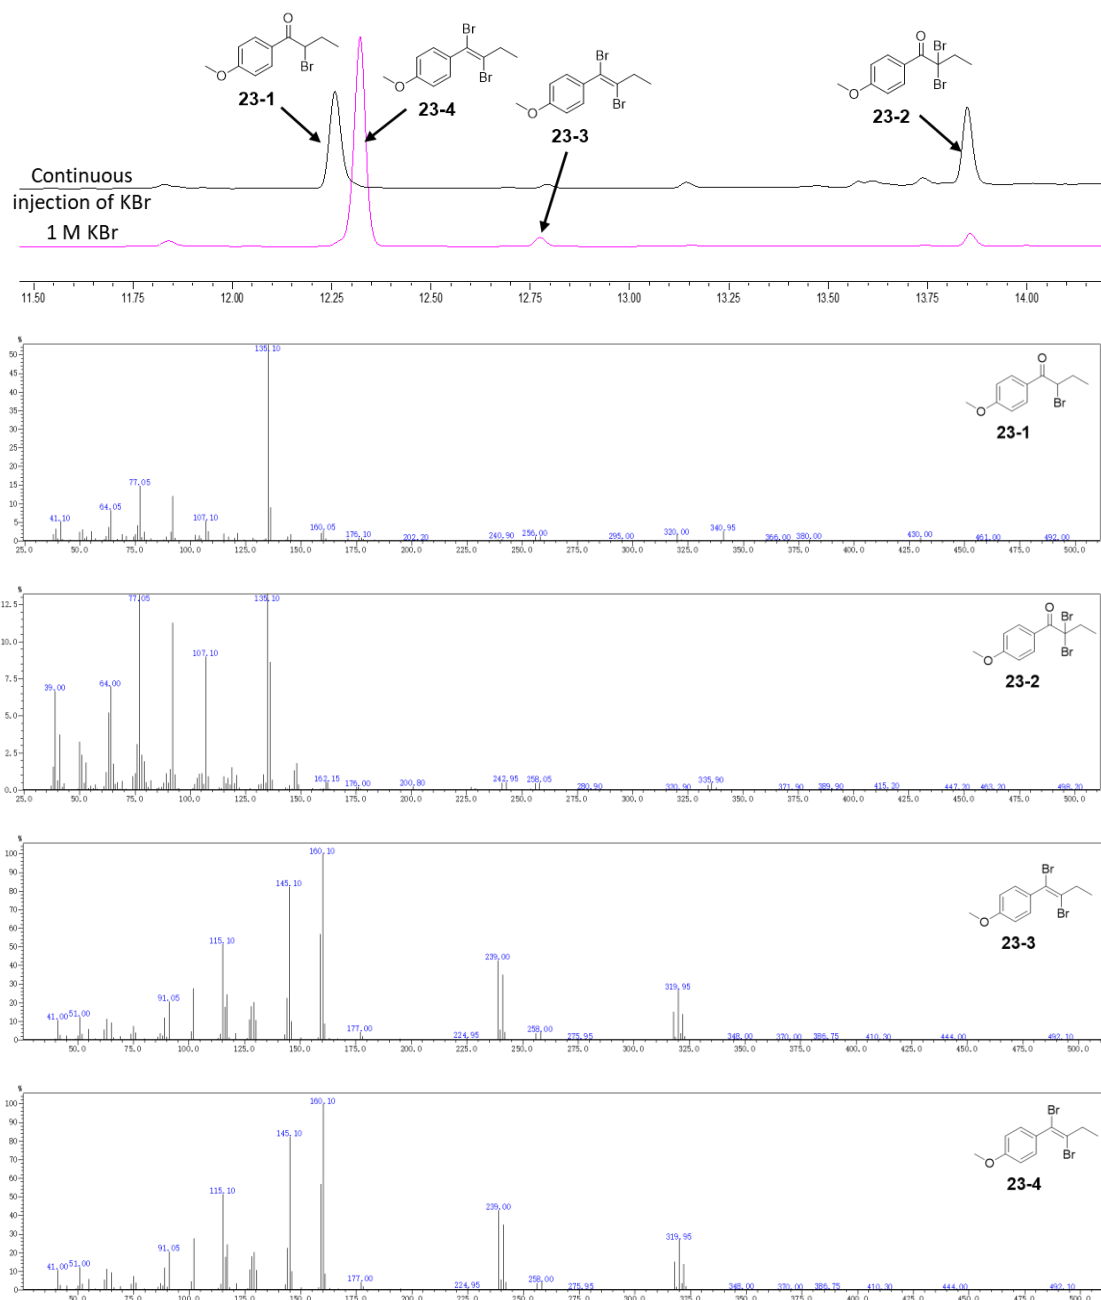

**Figure S26.** Representative GC and Mass spectrum of **23-1**, **23-2**, **23-3**, **23-4**

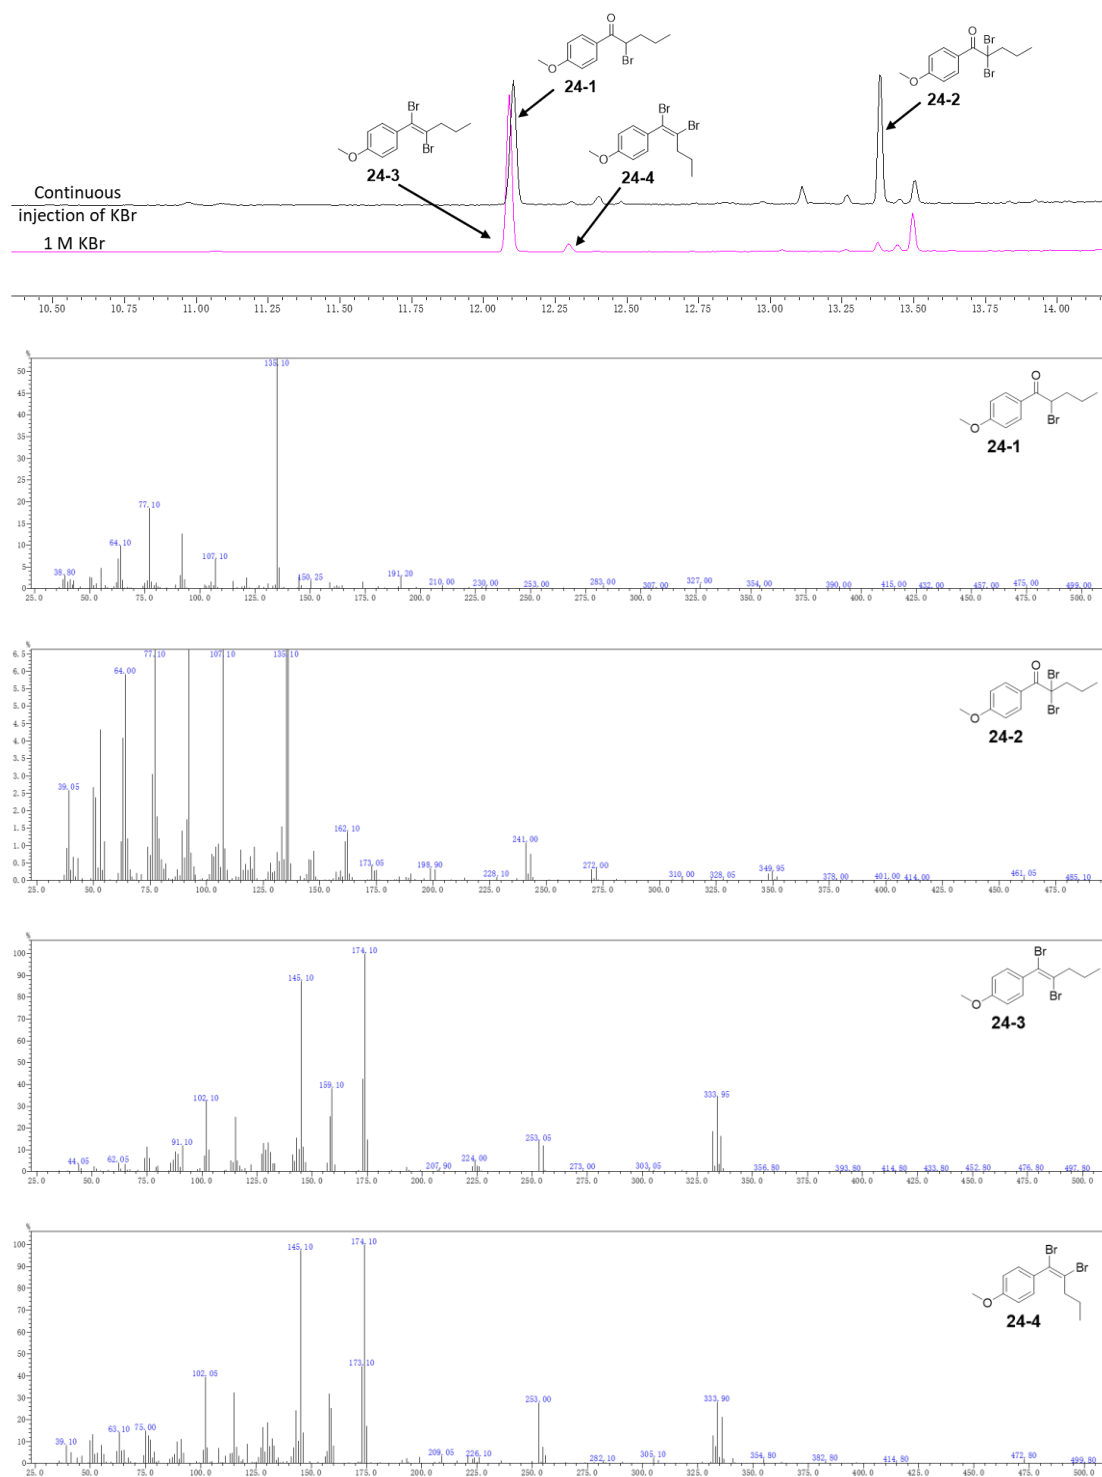

**Figure S27. Representative GC and Mass spectrum of 24-1, 24-2, 24-3, 24-4**

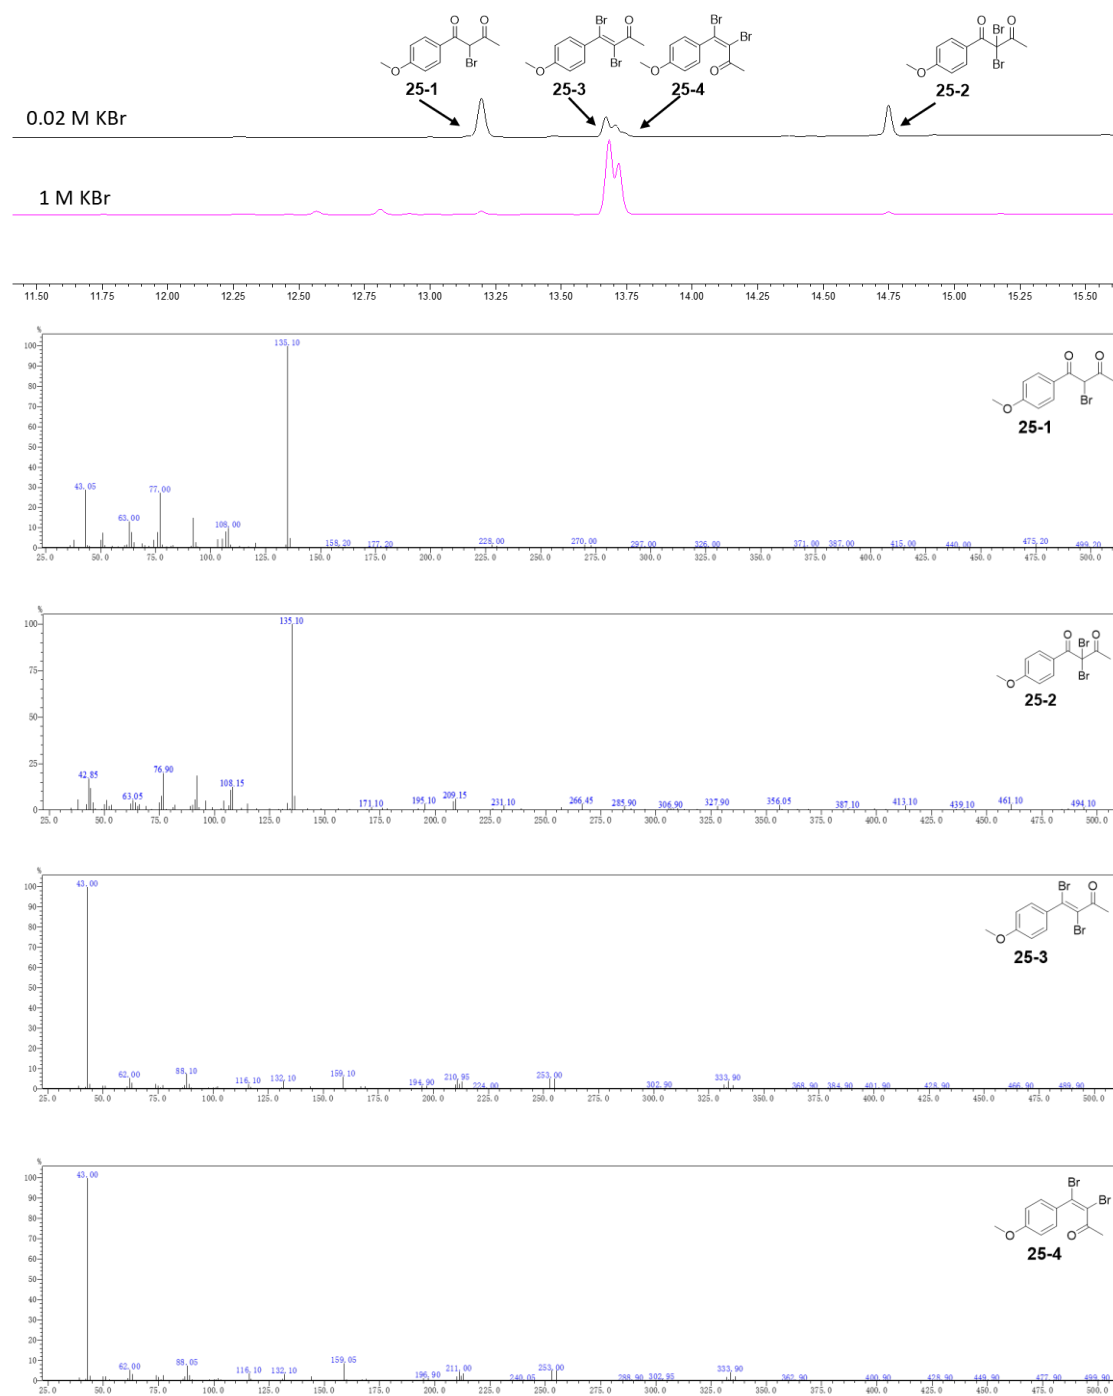

**Figure S28.** Representative GC and Mass spectrum of **25-1**, **25-2**, **25-3**, **25-4**

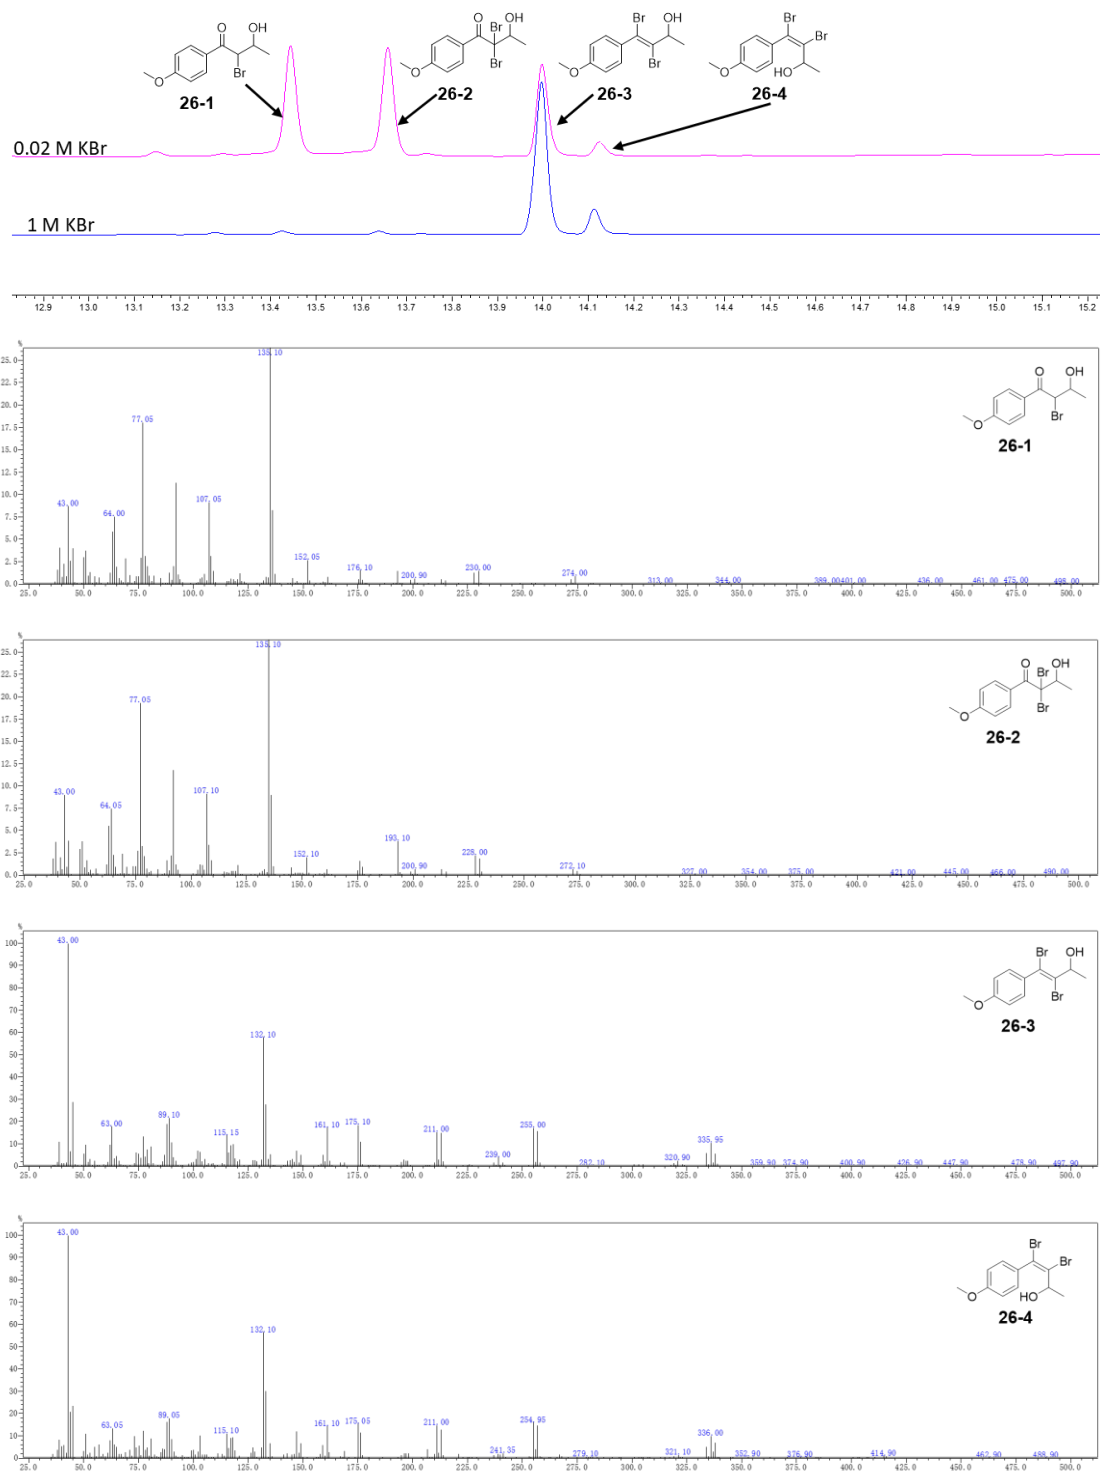

**Figure S29. Representative GC and Mass spectrum of 26-1, 26-2, 26-3, 26-4**

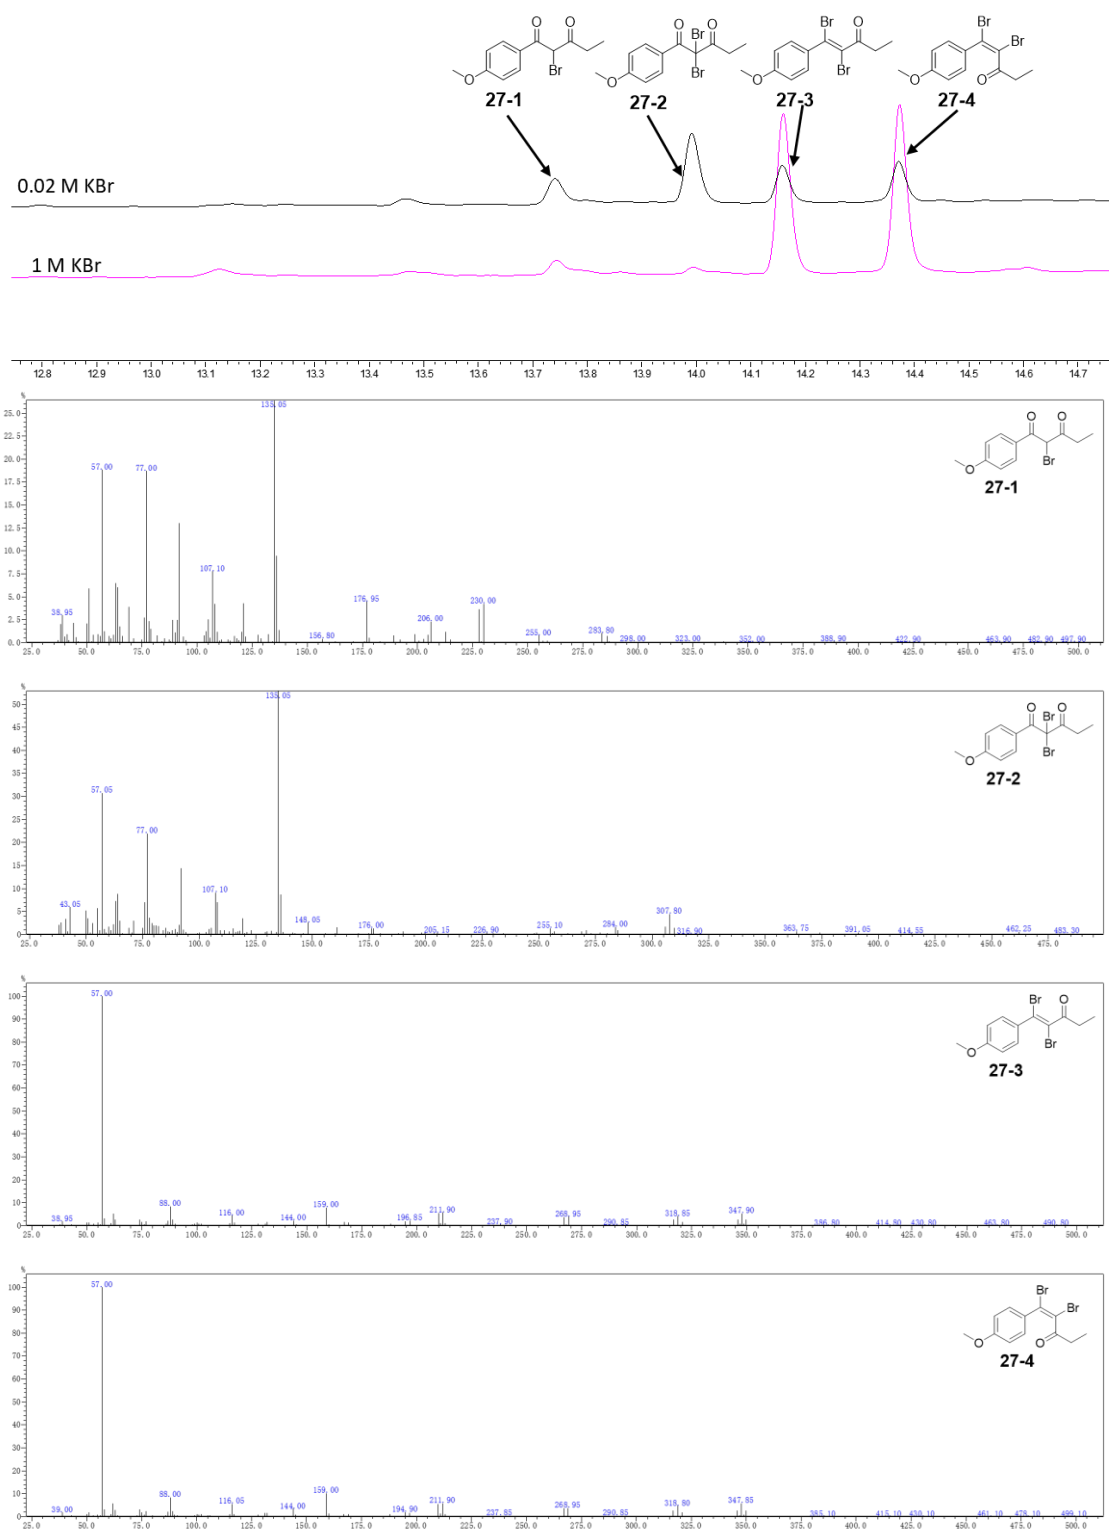

**Figure S30. Representative GC and Mass spectrum of 27-1, 27-2, 27-3, 27-4**

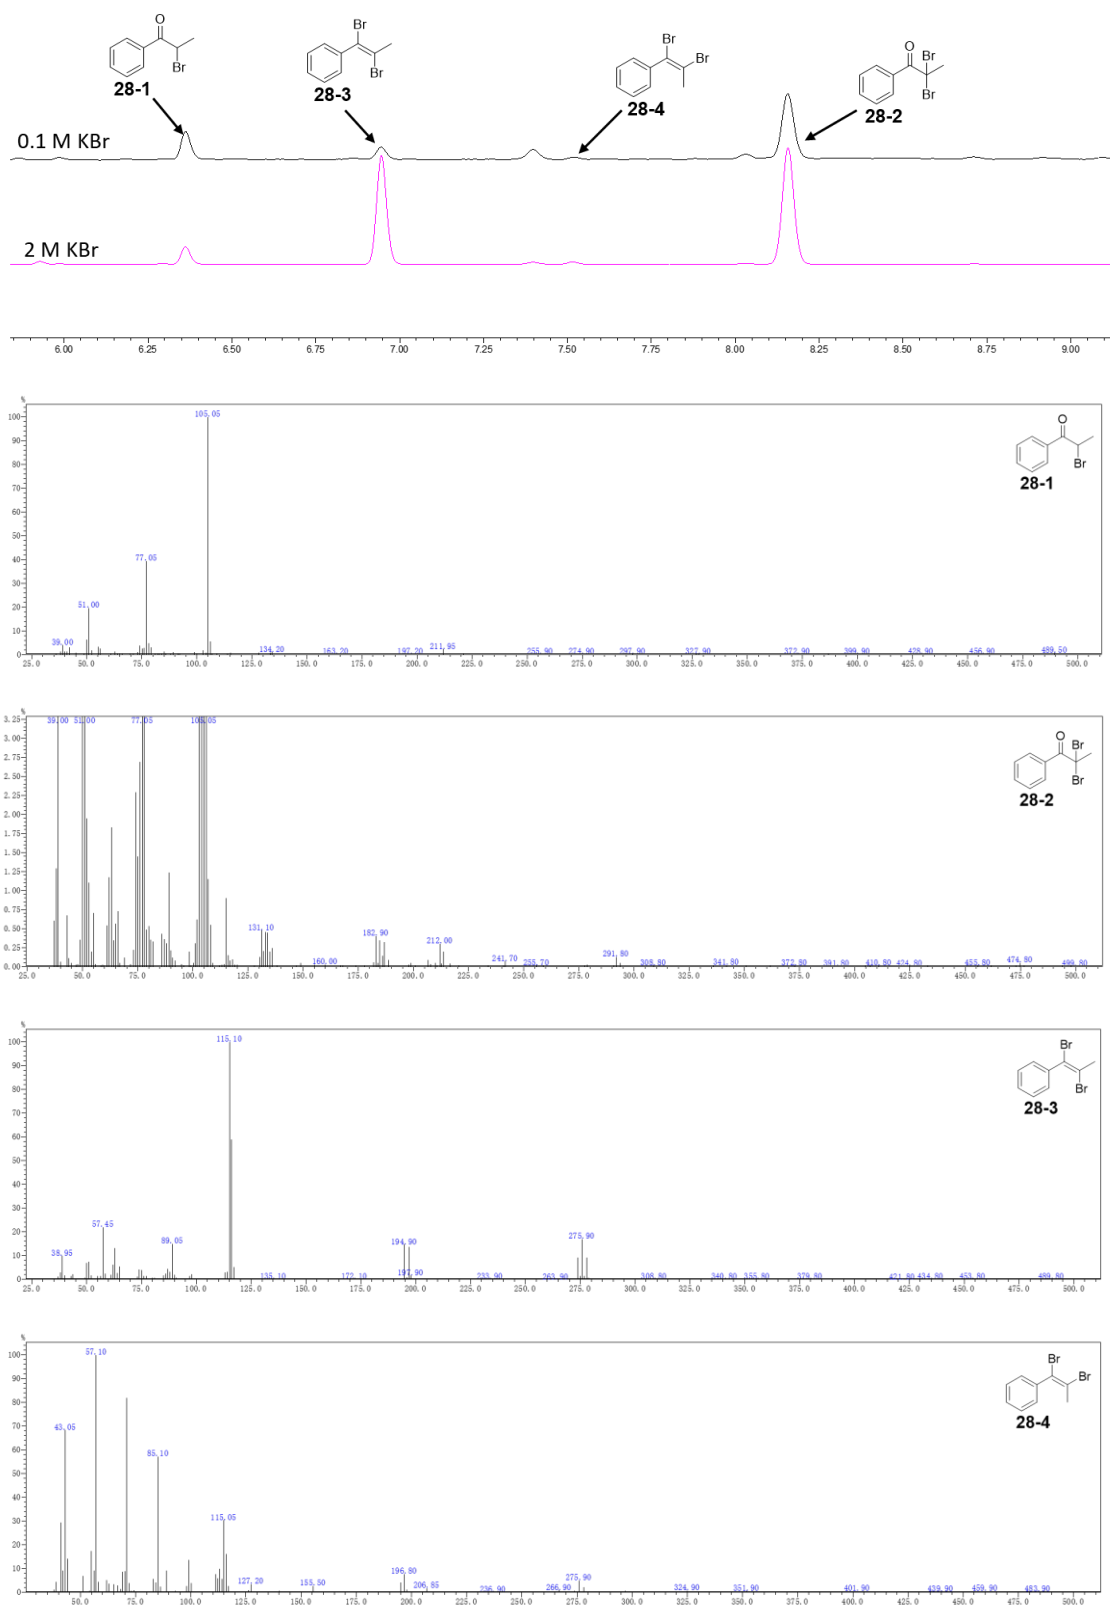

**Figure S31.** Representative GC and Mass spectrum of **28-1**, **28-2**, **28-3**, **28-4**

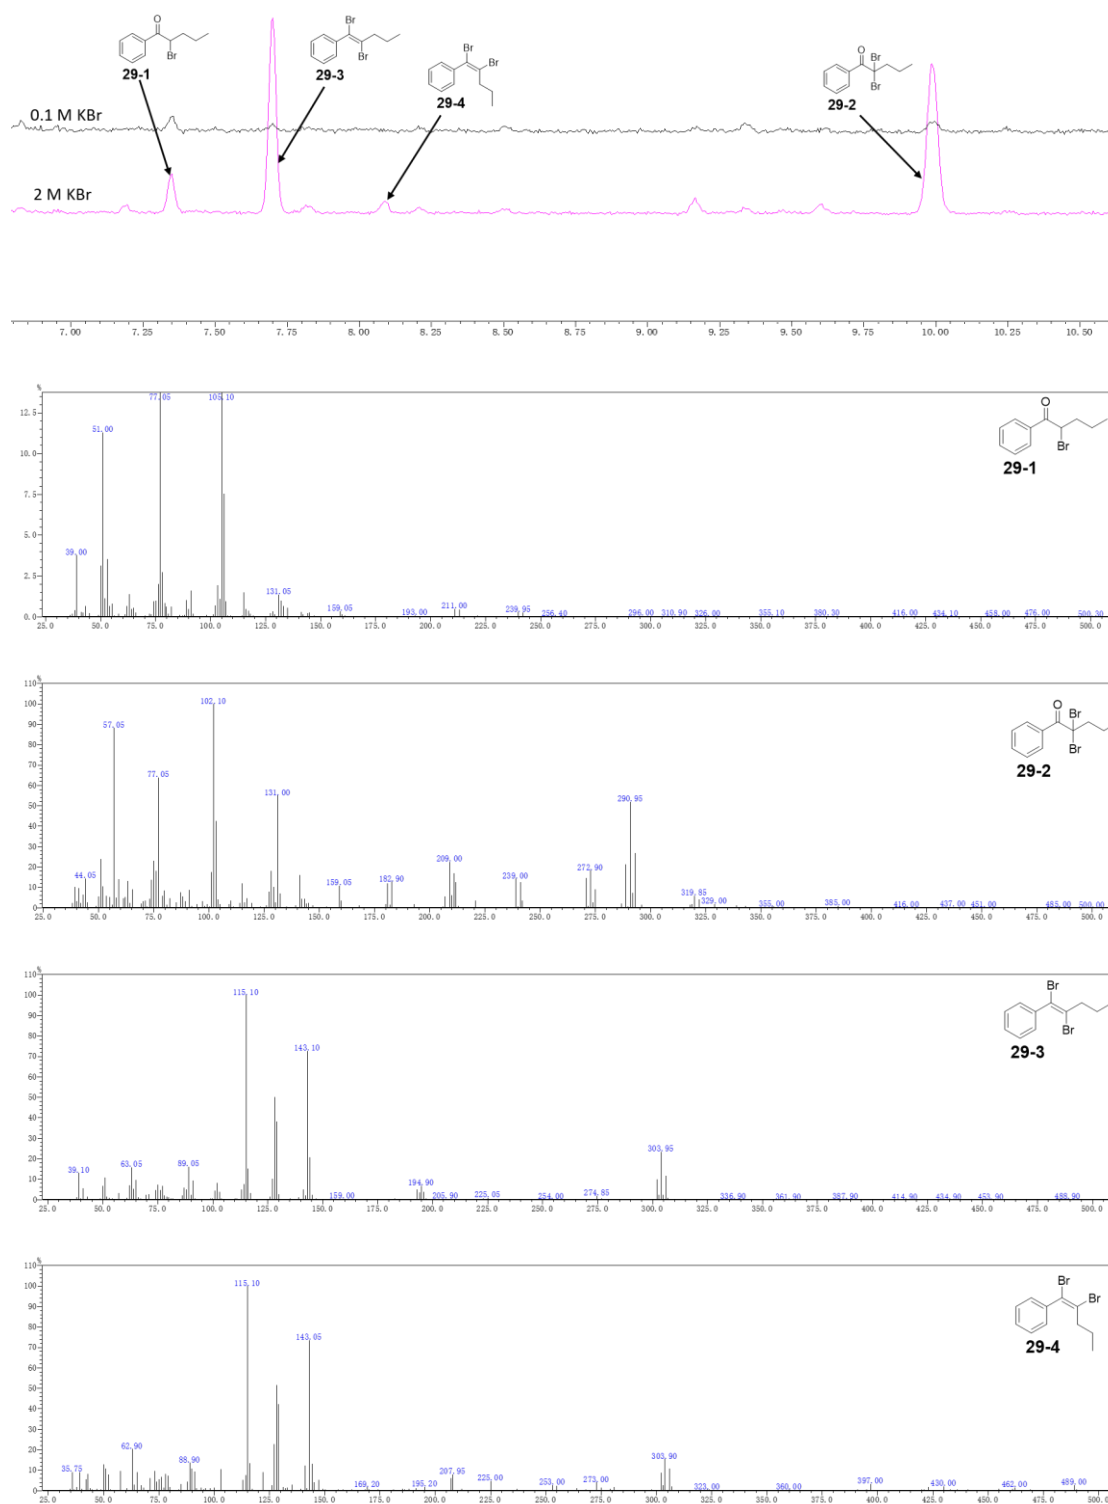

**Figure S32.** Representative GC and Mass spectrum of 29-1, 29-2, 29-3, 29-4

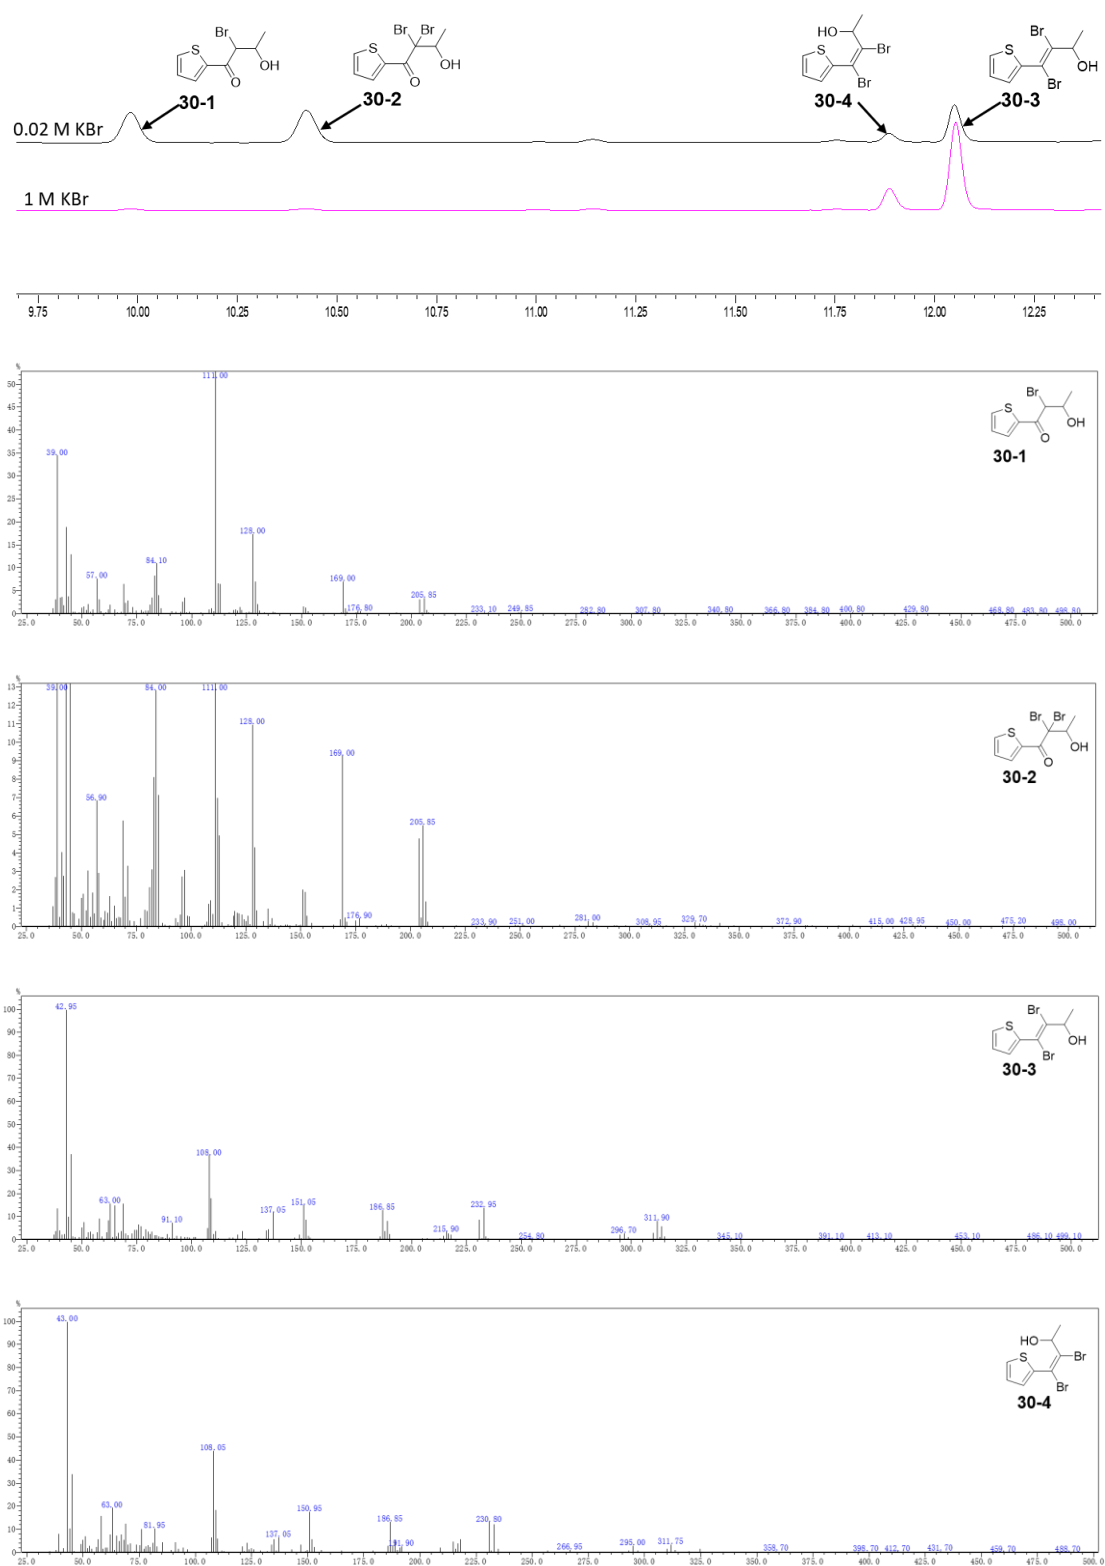

**Figure S33.** Representative GC and Mass spectrum of **30-1**, **30-2**, **30-3**, **30-4**

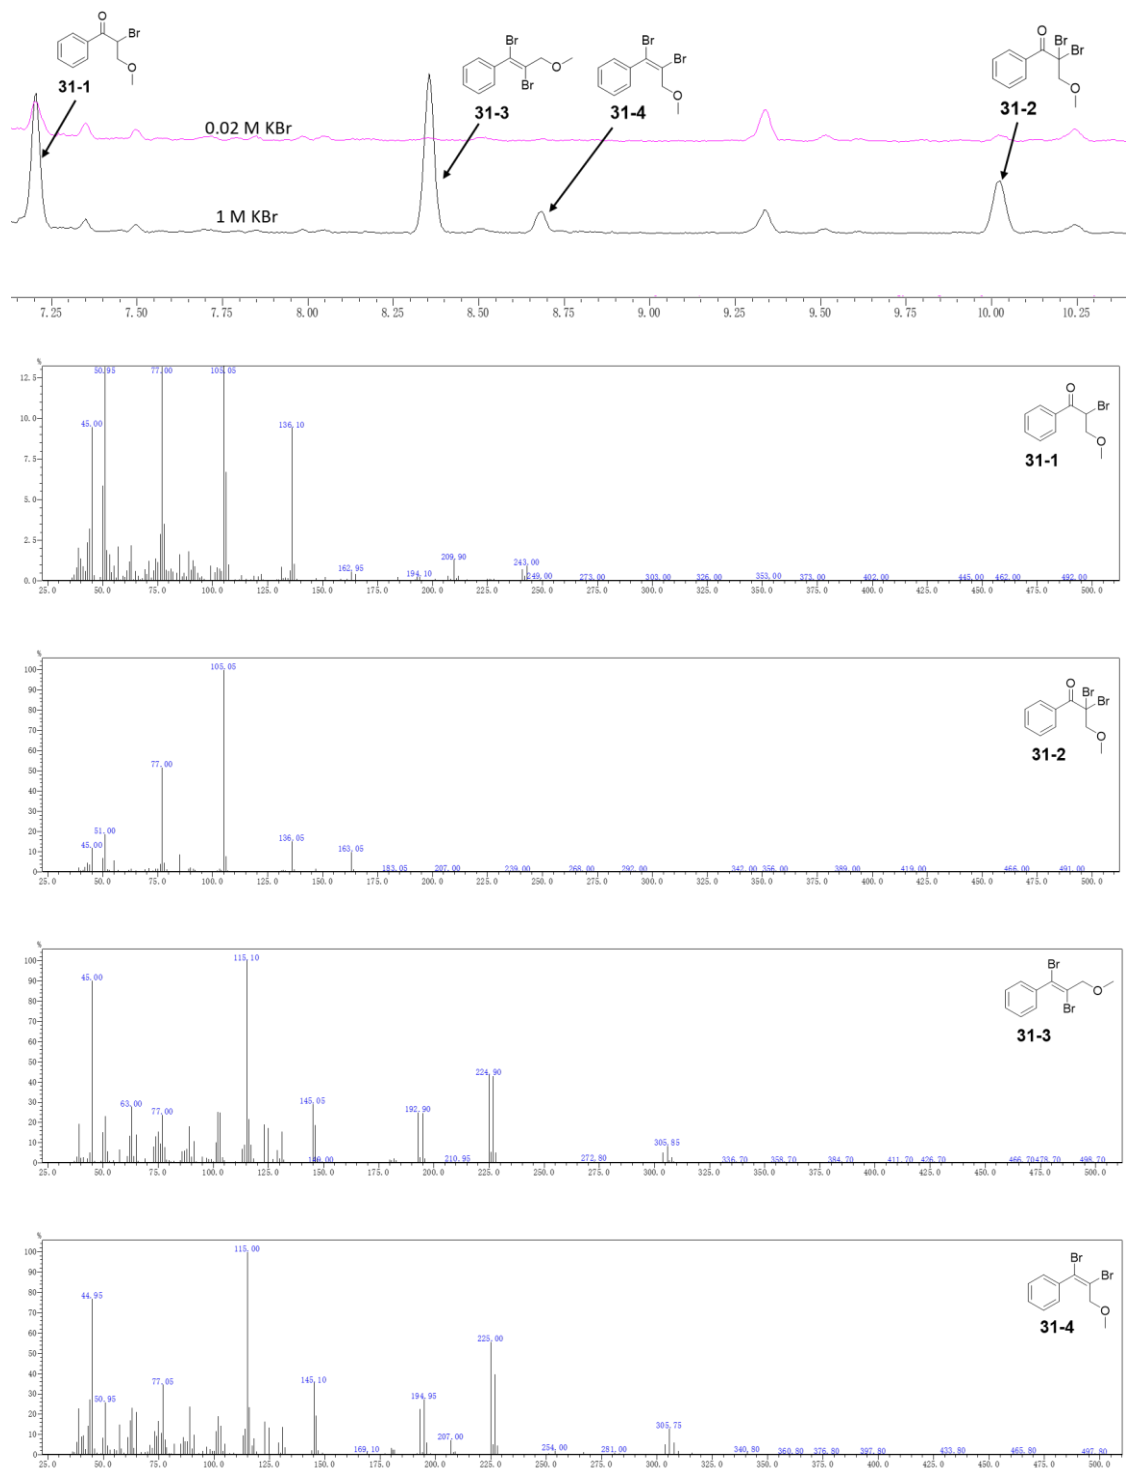

**Figure S34.** Representative GC and Mass spectrum of **31-1**, **31-2**, **31-3**, **31-4**

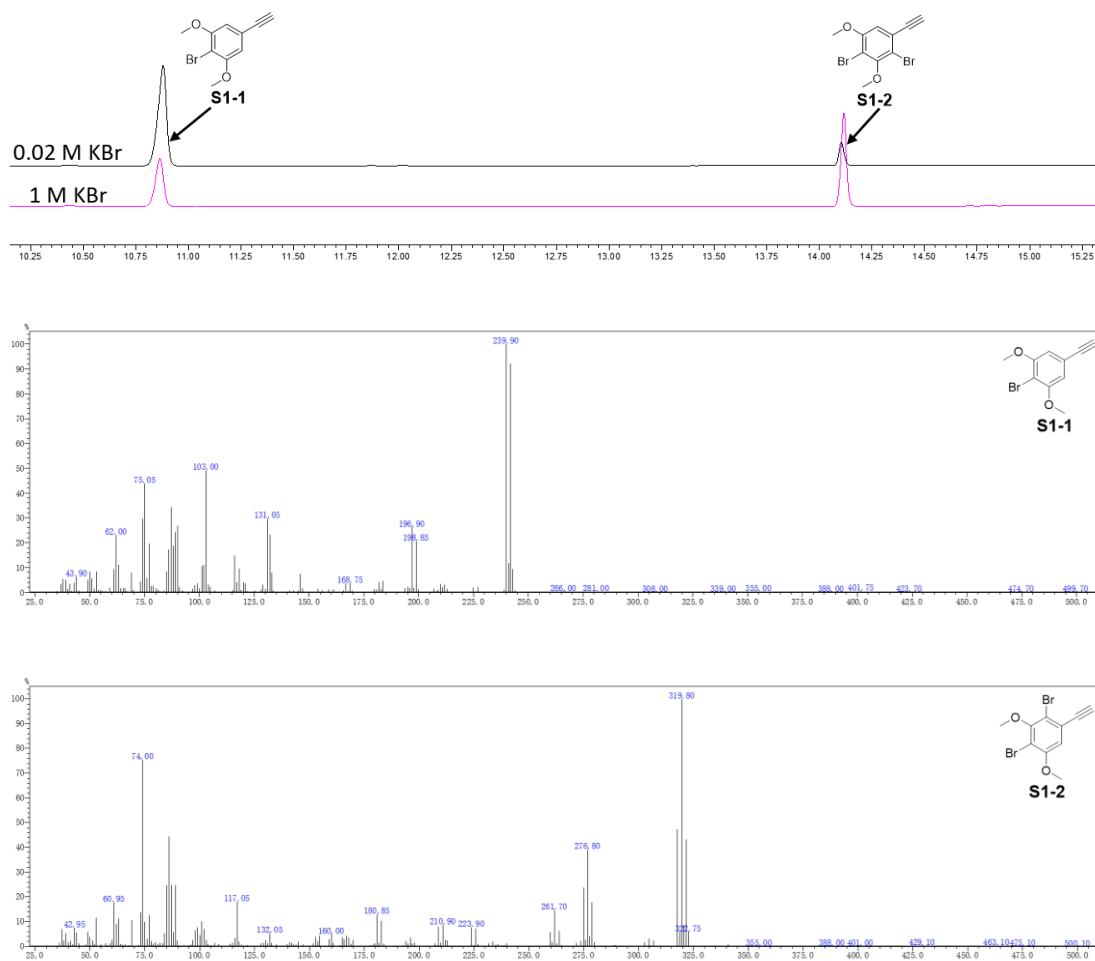

**Figure S35.** Representative GC and Mass spectrum of **S1-1**, **S1-2**

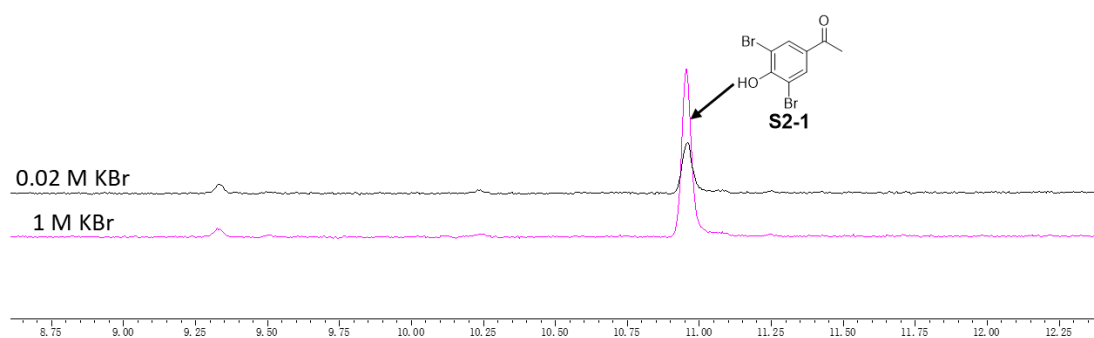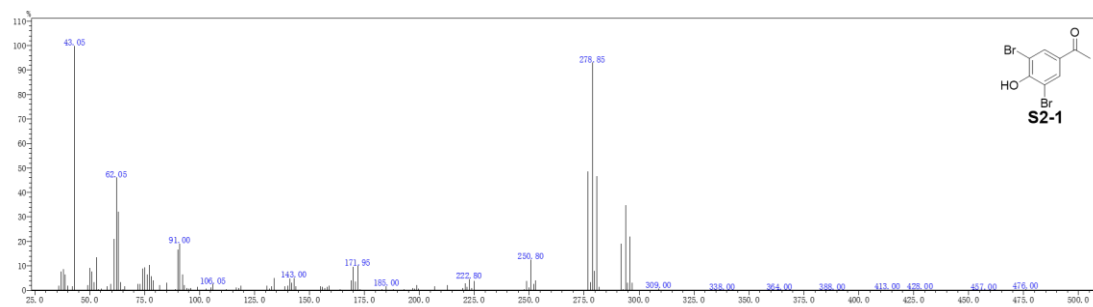

**Figure S36.** Representative GC and Mass spectrum of **S2-1**

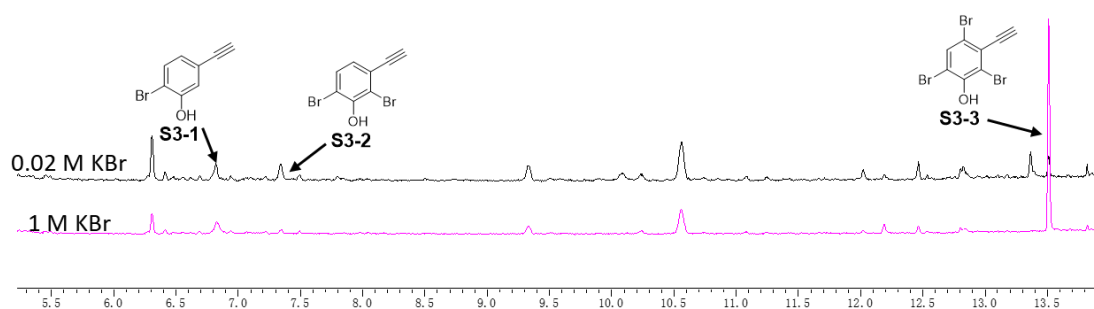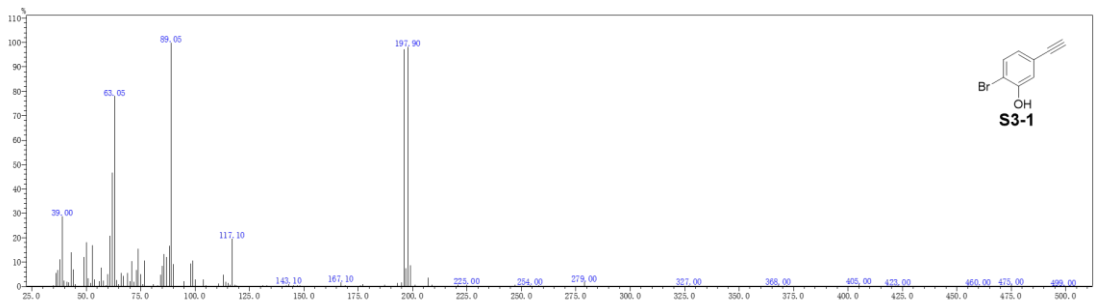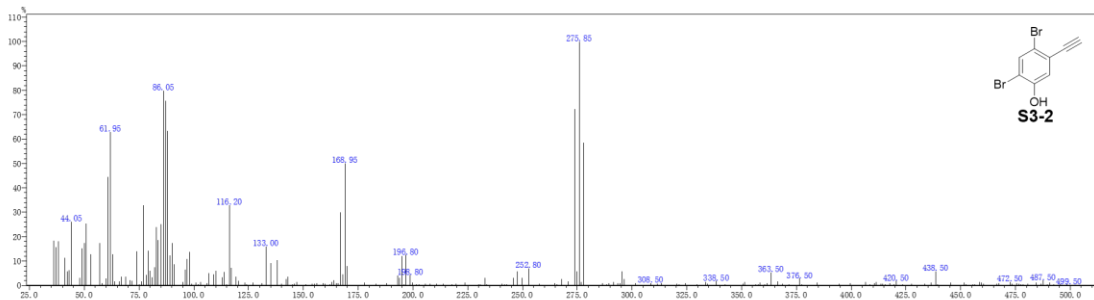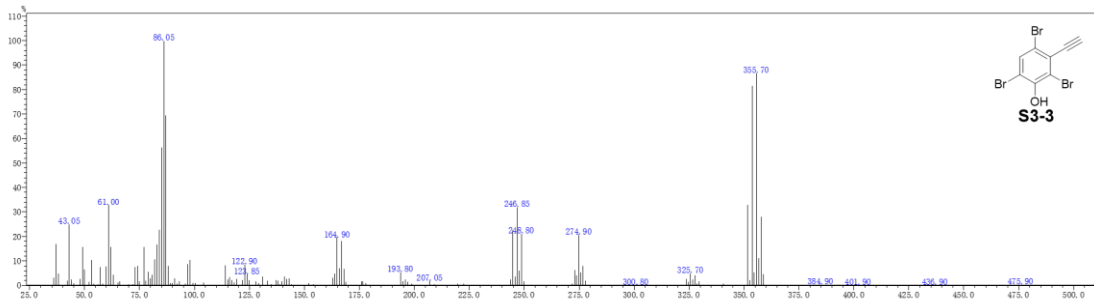

**Figure S37.** Representative GC and Mass spectrum of **S3-1**, **S3-2**, **S3-3**

# Crystal structure of **1-1**

**Table S5.** Crystal structure of **1-1**

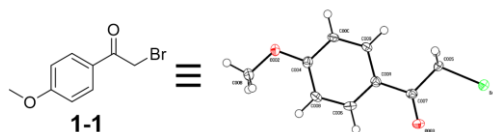

| Empirical formula                           | C <sub>9</sub> H <sub>9</sub> BrO <sub>2</sub>    |
|---------------------------------------------|---------------------------------------------------|
| Formula weight                              | 229.07                                            |
| Temperature/K                               | 103(3)                                            |
| Crystal system                              | monoclinic                                        |
| Space group                                 | P2 <sub>1</sub> /c                                |
| a/Å                                         | 7.52210(10)                                       |
| b/Å                                         | 12.39280(10)                                      |
| c/Å                                         | 9.91070(10)                                       |
| α/°                                         | 90                                                |
| β/°                                         | 110.8220(10)                                      |
| γ/°                                         | 90                                                |
| Volume/Å <sup>3</sup>                       | 863.535(17)                                       |
| Z                                           | 4                                                 |
| ρ <sub>calc</sub> mg/mm <sup>3</sup>        | 1.762                                             |
| μ/mm <sup>-1</sup>                          | 6.125                                             |
| F(000)                                      | 456.0                                             |
| Crystal size/mm <sup>3</sup>                | 0.1 × 0.1 × 0.1                                   |
| Radiation                                   | Cu Kα (λ=1.54184Å)                                |
| 2θ range for data collection                | 11.928 to 148.648°                                |
| Index ranges                                | -7 ≤ h ≤ 9, -14 ≤ k ≤ 15, -12 ≤ l ≤ 12            |
| Reflections collected                       | 16475                                             |
| Independent reflections                     | 1703[R(int) = 0.0256]                             |
| Data/restraints/parameters                  | 1703/0/110                                        |
| Goodness-of-fit on F <sup>2</sup>           | 1.233                                             |
| Final R indexes [I>=2σ (I)]                 | R <sub>1</sub> = 0.0268, wR <sub>2</sub> = 0.1257 |
| Final R indexes [all data]                  | R <sub>1</sub> = 0.0270, wR <sub>2</sub> = 0.1262 |
| Largest diff. peak/hole / e Å <sup>-3</sup> | 0.40/-1.11                                        |

NMR analysis of products from preparative-scale synthesis

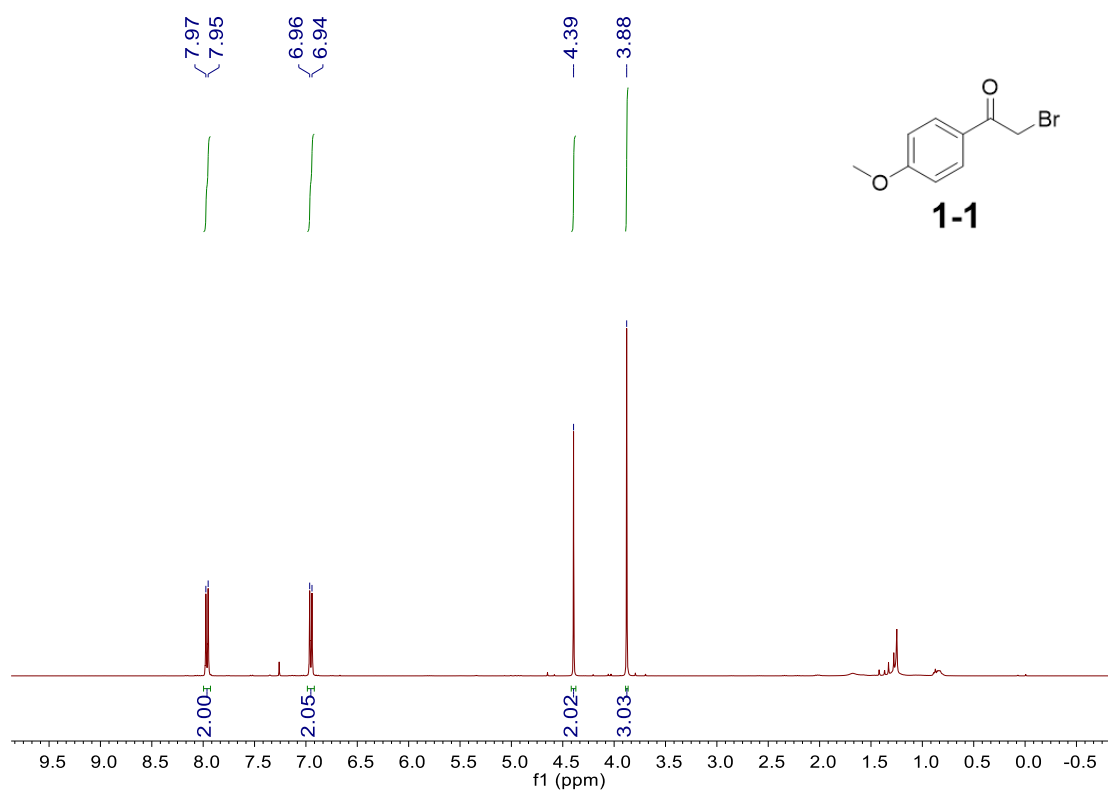

**Figure S38.**  $^1\text{H}$  NMR of **1-1**.  $^1\text{H}$  NMR (400 MHz, Chloroform- $d$ ):  $\delta$  7.96 (d,  $J$  = 9.0 Hz, 2H), 6.95 (d,  $J$  = 9.0 Hz, 2H), 4.39 (s, 2H), 3.88 (s, 3H).

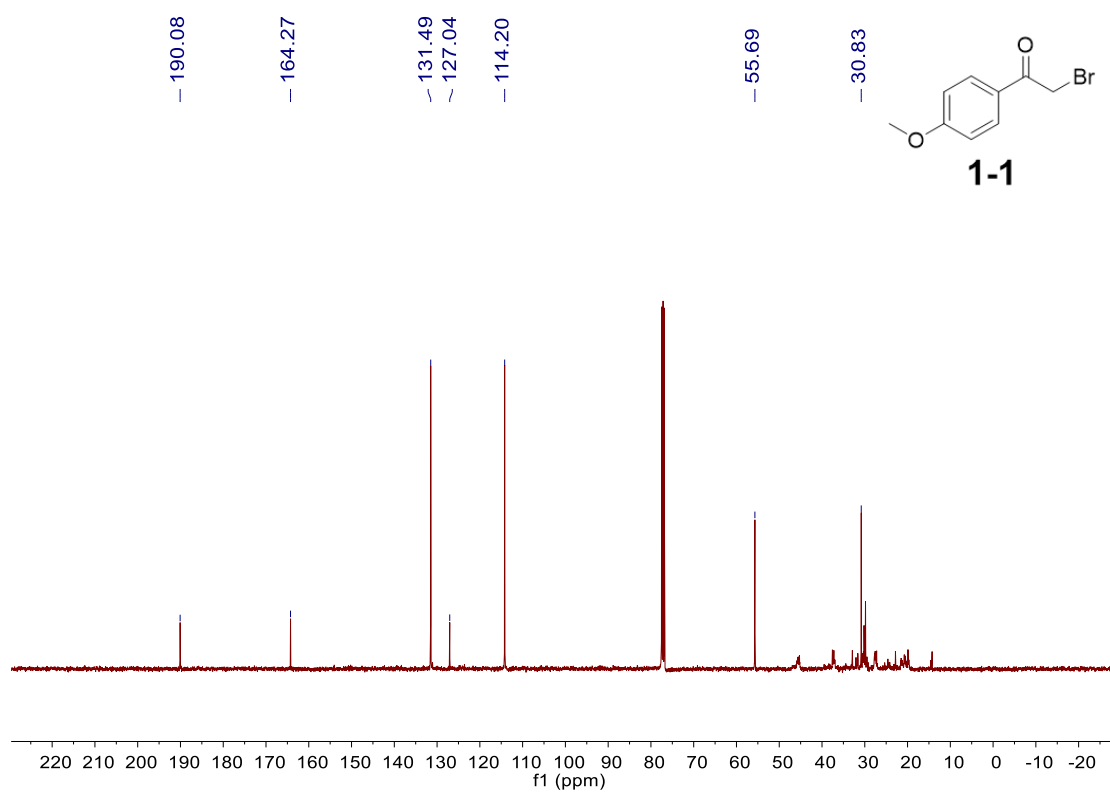

**Figure S39.**  $^{13}\text{C}$  NMR of **1-1**.  $^{13}\text{C}$  NMR (101 MHz, Chloroform-*d*):  $\delta$  190.08, 164.27, 131.49, 127.04, 114.20, 55.69, 30.83.

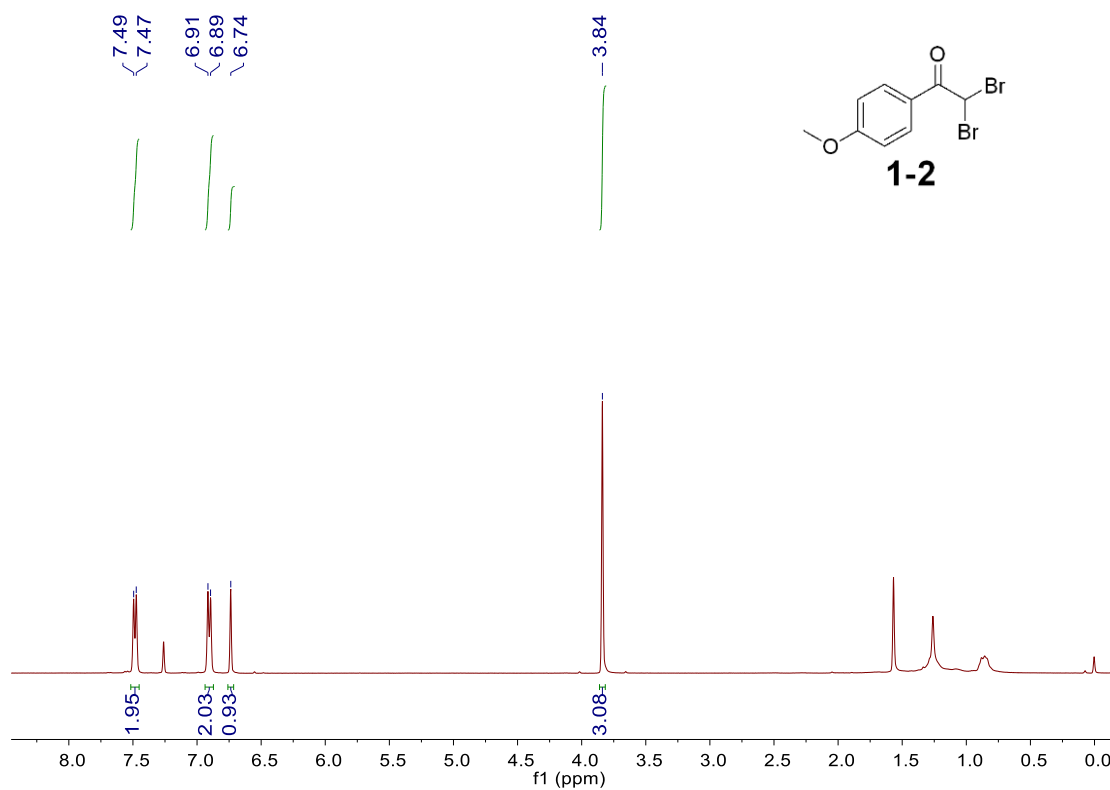

**Figure S40.** <sup>1</sup>H NMR of **1-2**. <sup>1</sup>H NMR (400 MHz, Chloroform-*d*): δ 7.48 (d, *J* = 8.1 Hz, 2H), 6.90 (d, *J* = 8.1 Hz, 2H), 6.74 (s, 1H), 3.84 (s, 3H).

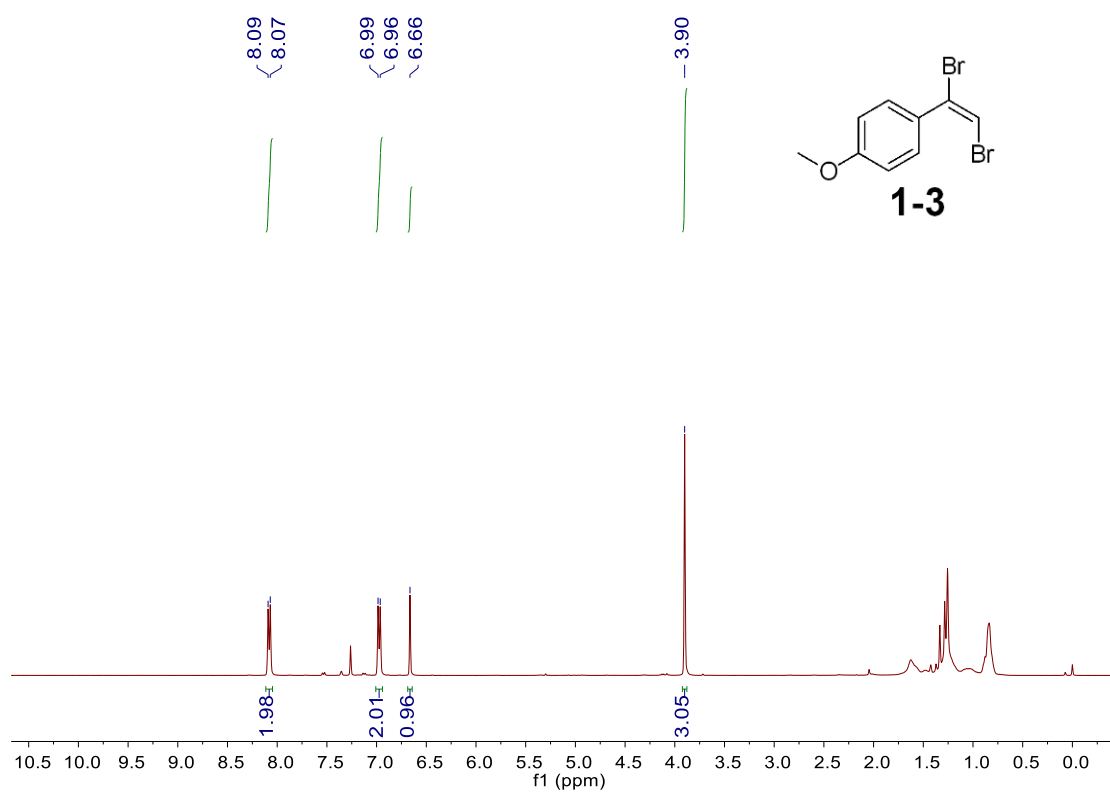

**Figure S41.**  $^1\text{H}$  NMR of **1-3**.  $^1\text{H}$  NMR (400 MHz, Chloroform-*d*):  $\delta$  8.11 – 8.05 (m, 2H), 6.97 (d,  $J$  = 8.8 Hz, 2H), 6.66 (s, 1H), 3.90 (s, 3H).

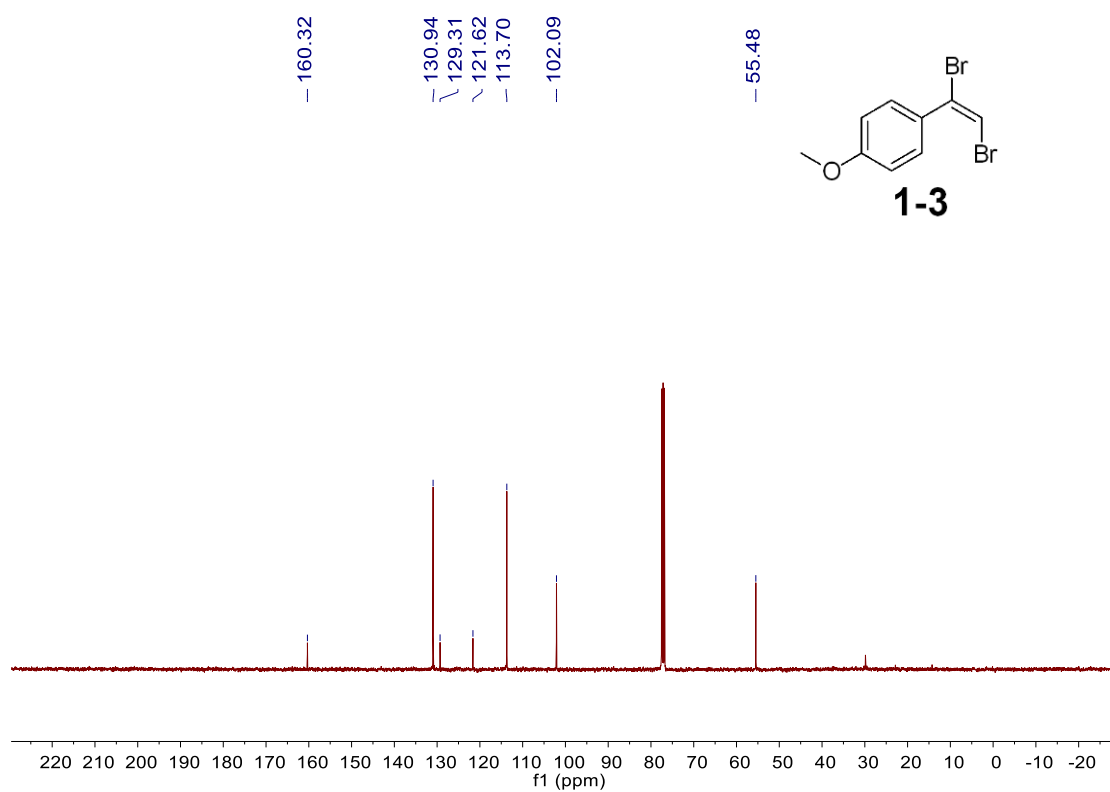

**Figure S42.**  $^{13}\text{C}$  NMR of **1-3**.  $^{13}\text{C}$  NMR (101 MHz, Chloroform-*d*):  $\delta$  160.32, 130.94, 129.31, 121.62, 113.70, 102.09, 55.48.

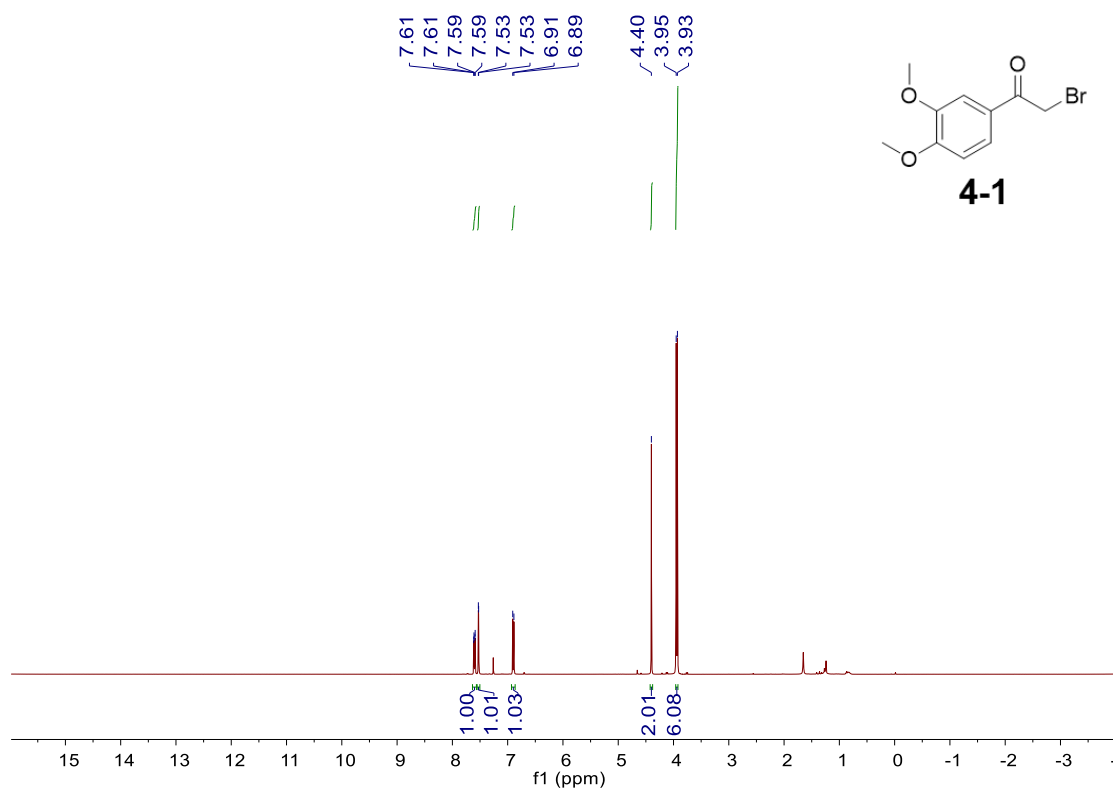

**Figure S43.** <sup>1</sup>H NMR of **4-1**. <sup>1</sup>H NMR (400 MHz, Chloroform-*d*): δ 7.60 (dd, *J* = 8.4, 1.9 Hz, 1H), 7.53 (d, *J* = 1.9 Hz, 1H), 6.90 (d, *J* = 8.4 Hz, 1H), 4.40 (s, 2H), 3.94 (d, *J* = 8.9 Hz, 6H).

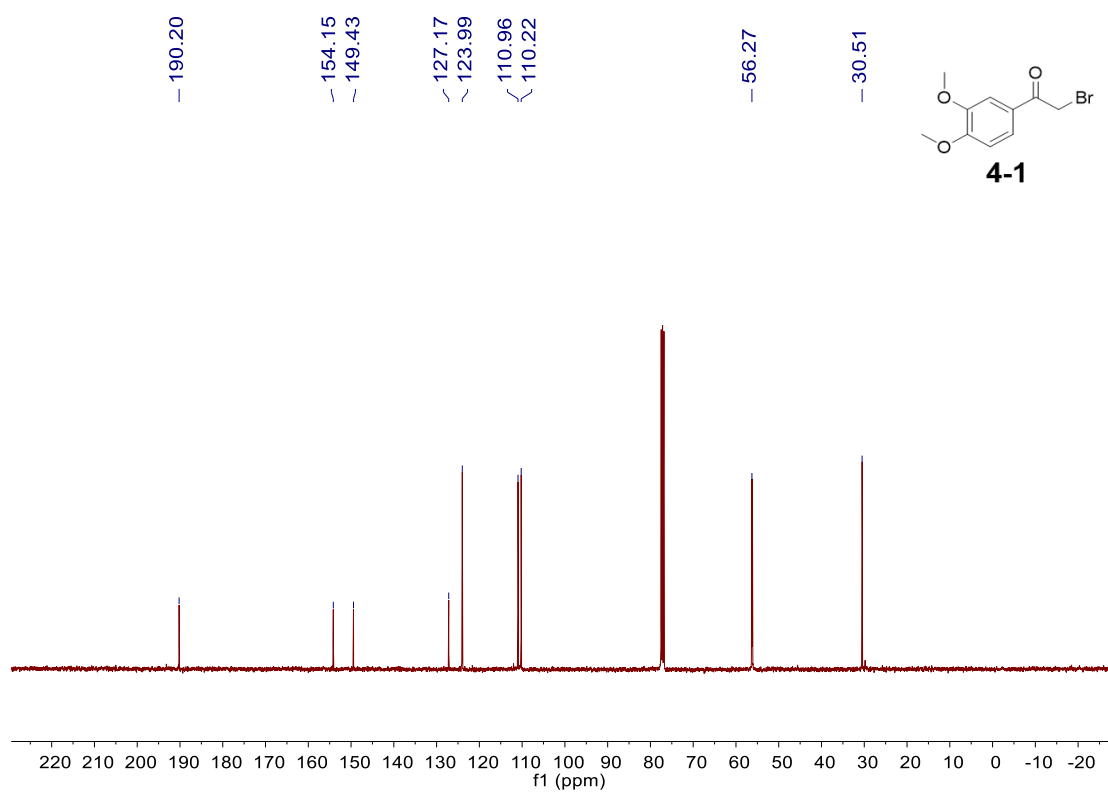

**Figure S44.** <sup>13</sup>C NMR of **4-1**. <sup>13</sup>C NMR (101 MHz, Chloroform-*d*): δ 190.20, 154.15, 149.43, 127.17, 123.99, 110.96, 110.22, 56.27, 30.51.

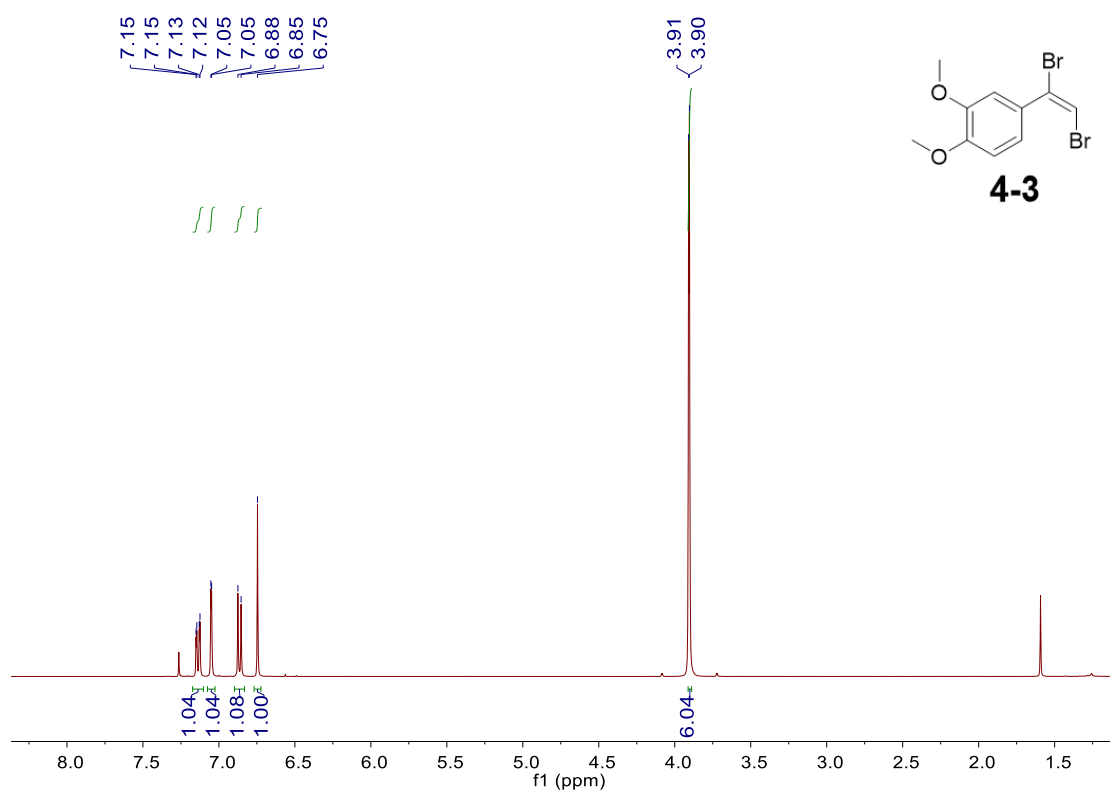

**Figure S45.** <sup>1</sup>H NMR of **4-3**. <sup>1</sup>H NMR (400 MHz, Chloroform-*d*): δ 7.14 (dd, *J* = 8.4, 2.0 Hz, 1H), 7.05 (d, *J* = 1.9 Hz, 1H), 6.86 (d, *J* = 8.4 Hz, 1H), 6.75 (s, 1H), 3.91 (d, *J* = 2.1 Hz, 6H).

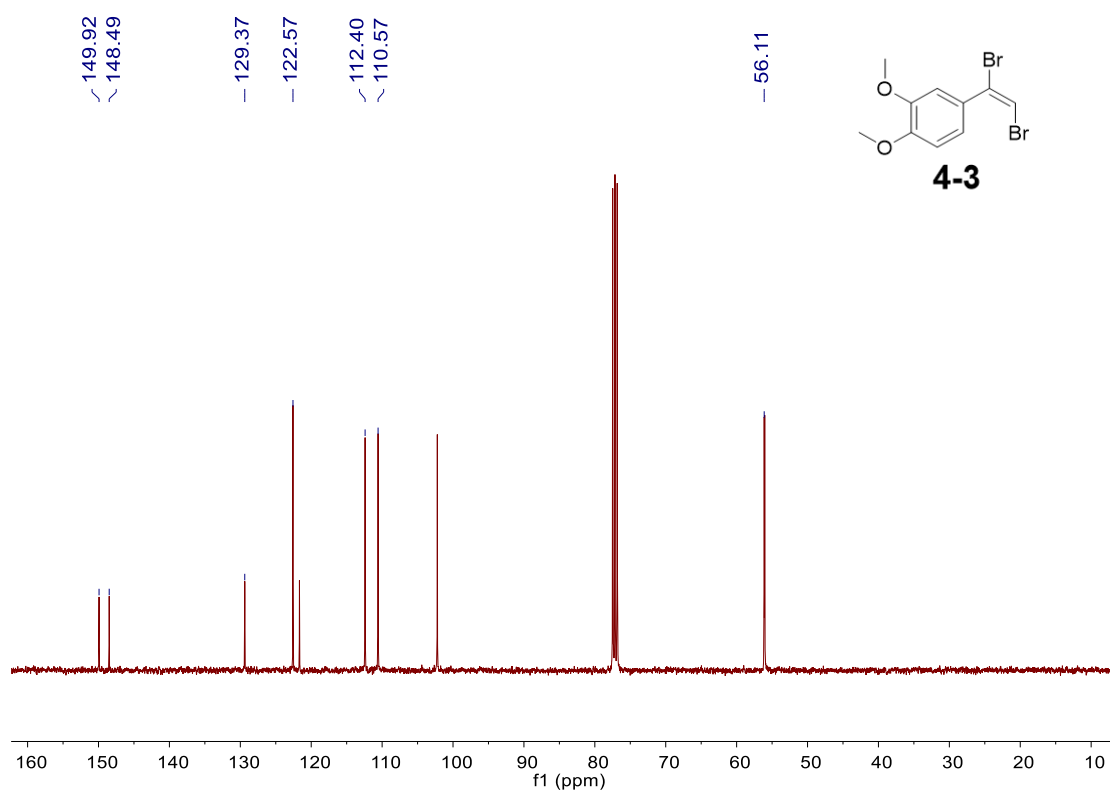

**Figure S46.** <sup>13</sup>C NMR of **4-3**. <sup>13</sup>C NMR (101 MHz, Chloroform-*d*): δ 149.92, 148.49, 129.37, 122.57, 112.40, 110.57, 56.11.

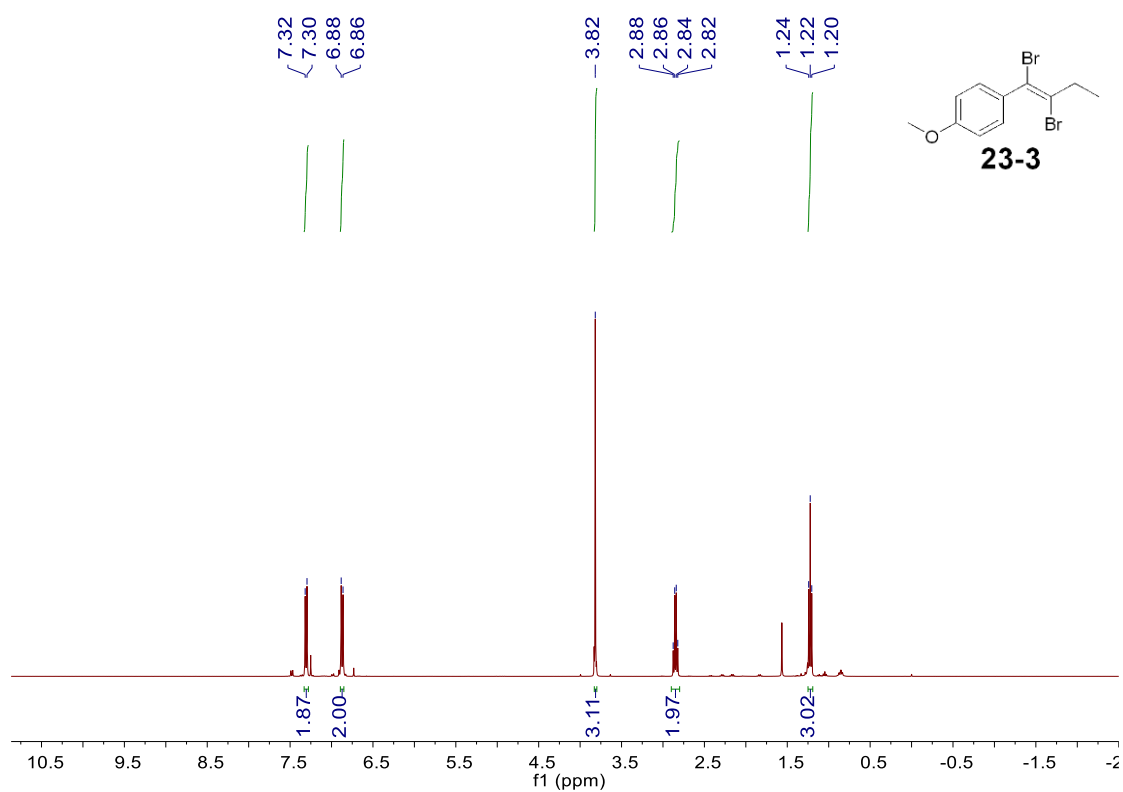

**Figure S47.** <sup>1</sup>H NMR of **22-3**. <sup>1</sup>H NMR (400 MHz, Chloroform-*d*): δ 7.31 (d, *J* = 8.8 Hz, 2H), 6.87 (d, *J* = 8.8 Hz, 2H), 3.82 (s, 3H), 2.85 (q, *J* = 7.4 Hz, 2H), 1.22 (t, *J* = 7.4 Hz, 3H).

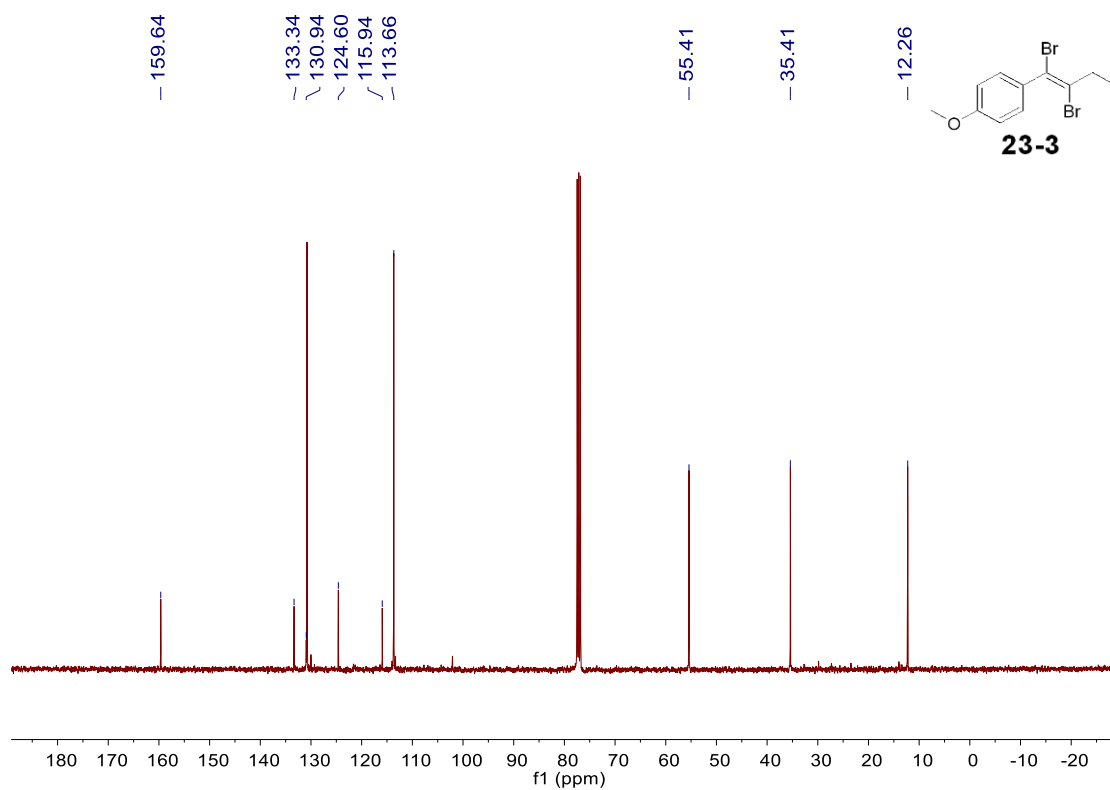

**Figure S48.** <sup>13</sup>C NMR of **22-3**. <sup>13</sup>C NMR (101 MHz, Chloroform-*d*): δ 159.64, 133.34, 124.60, 115.94, 113.66, 55.41, 35.41, 12.26.

## Mechanism investigation

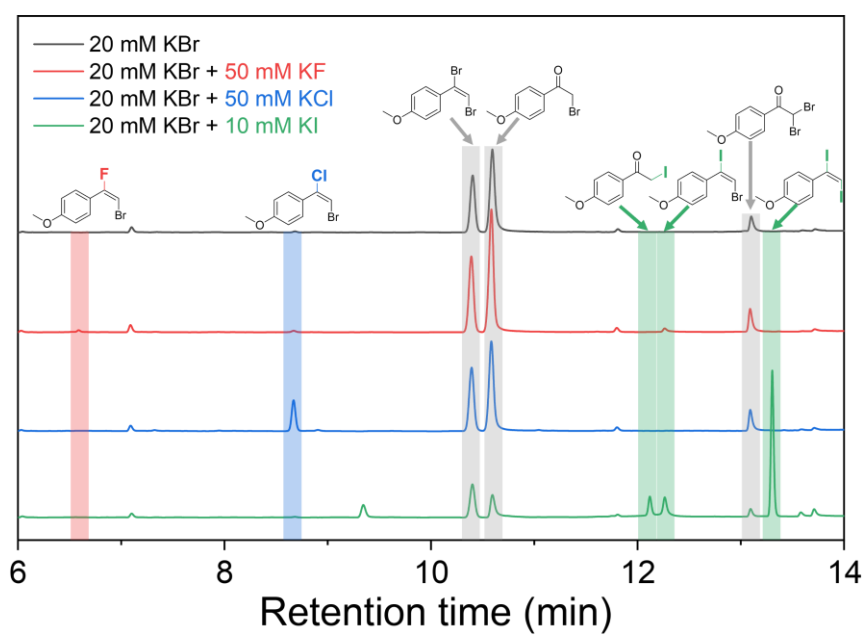

Figure S49. Trapping the carbenium ion by using exogenous nucleophiles (KF, KCl and KI). Condition: 10% DMSO in citrate buffer (100 mM, pH 5.0), **[1]** = 10 mM, [CVCPO] = 150 nM, [H<sub>2</sub>O<sub>2</sub>] = 100 mM, [KBr] = 20 mM, 30 °C, 800 rpm, 0.5 h. Exogenous KX: [KF] = 50 mM, [KCl] = 50 mM, [KI] = 10 mM. The products were determined by GC and GC-MS.

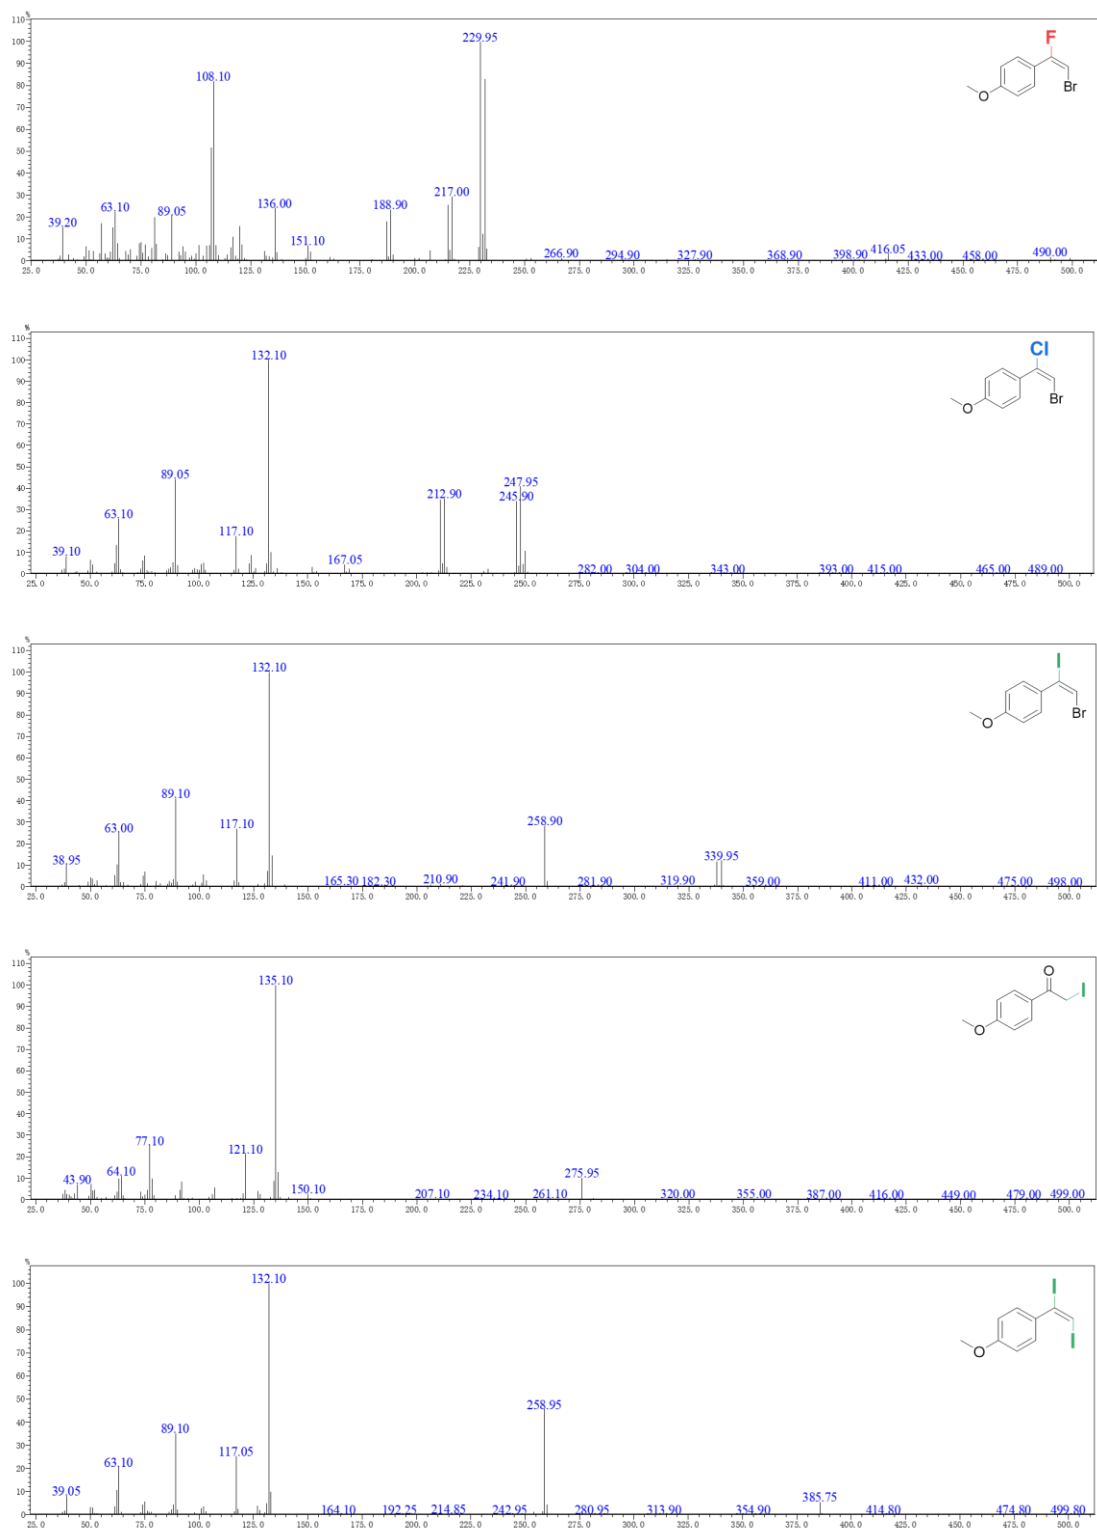

Figure S50. Mass spectrum of multi-halogenated products in figure S49.

## E-factor analysis

Table S6. Comparison of E-factor for the synthesis of  $\alpha$ -bromoketones.

| Item                  | Mass (g)                                        |                                     |                                                           |            |
|-----------------------|-------------------------------------------------|-------------------------------------|-----------------------------------------------------------|------------|
| Substrate             | 0.12                                            | 0.03                                | 0.03                                                      | 0.13       |
| Cosubstrate           | 0.49 (HBr)                                      | 0.04 (NBS)                          | 0.06 (oxidants)                                           | 2.38 (KBr) |
| Cosolvent             | 1.57                                            | 1.03                                | 3.98                                                      | 3.63       |
| Catalyst              | -                                               | 0.00                                | 0.01                                                      | 0.00       |
| Solvent for isolation | 67.29                                           | 22.41                               | 22.41                                                     | 67.29      |
| Silica gel            | 11.00                                           | 3.66                                | 3.66                                                      | 11.00      |
| Sum of wastes         | 80.48                                           | 27.17                               | 30.15                                                     | 84.44      |
| Product               | 0.16                                            | 0.03                                | 0.03                                                      | 0.09       |
| E factor              | 508.09                                          | 790.93                              | 1180.57                                                   | 938        |
| System                | H <sub>2</sub> O <sub>2</sub> /KBr <sup>3</sup> | AuCl <sub>3</sub> /NBS <sup>4</sup> | Ph <sub>3</sub> PAuNTf <sub>2</sub> /Oxidant <sup>5</sup> | This work  |

Table S7. Comparison of E-factor for the synthesis of 1,2-Dibromostyrenes

| Item                  | Mass (g)                             |                                   |                  |
|-----------------------|--------------------------------------|-----------------------------------|------------------|
| Substrate             | 0.04                                 | 0.03                              | 0.13             |
| Cosubstrate           | 0.22 (PIDA/NaBr)                     | 0.07 (NBS)                        | (Recyclable KBr) |
| Cosolvent             | 2.36                                 | 0.53                              | 3.63             |
| Catalyst              | -                                    | 0.05 (PPh <sub>3</sub> )          | 0.00             |
| Solvent for isolation | 21.83                                | 13.10                             | 65.50            |
| Silica gel            | 3.67                                 | 2.20                              | 11.00            |
| Sum of wastes         | 28.11                                | 15.98                             | 80.26            |
| Product               | 0.06                                 | 0.03                              | 0.22             |
| E factor              | 499                                  | 591.28                            | 363              |
| System                | Hypervalent Iodine/NaBr <sup>6</sup> | NBS/PPh <sub>3</sub> <sup>2</sup> | This work        |

## References

- 1 H. Li, S. H. H. Younes, S. Chen, P. Duan, C. Cui, R. Wever, W. Zhang, F. Hollmann, *ACS Catal.*, 2022, **12**, 4554–4559.
- 2 W. Wang, M. Wang, W. Xu, B. Zhao, H. Zhang, Y. Gao, S. Guo and Y. Wang, *Org. Chem. Front.*, 2023, **10**, 3903–3908.
- 3 G. I. Nikishin, N. I. Kapustina, L. L. Sokova, O. V. Bitjukov and A. O. Terent'ev, *RSC Adv.*, 2018, **8**, 28632–28636.
- 4 Y. Xing, M. Zhang, S. Cicarelli, J. Lee and B. Catano, *Eur J Org Chem*, 2017, **2017**, 781–785.
- 5 W. He, L. Xie, Y. Xu, J. Xiang and L. Zhang, *Org. Biomol. Chem.*, 2012, **10**, 3168.
- 6 Y. Li, X. Chen, D. Huang, Z. Xie and Y. Liu, *Front. Chem.*, 2022, **10**, 879789.
